# Supplementary material for: Structural characterization and anti-inflammatory potency of Mesobuthus martensii Karsch oligopeptides in lipopolysaccharide (LPS)-induced RAW264.7 macrophages
Source: Royal Society of Chemistry journal article supplement (doi:10.1039/c9ra01623f), 2019-01-01

2

Spectrum from mass20181030.wiff2 (sample 4) - 2, Experiment 10, +IDA TOF MSMS (50 - 1500) from 0.071 min  
Precursor: 762.3 Da, +1, CE: 35.0

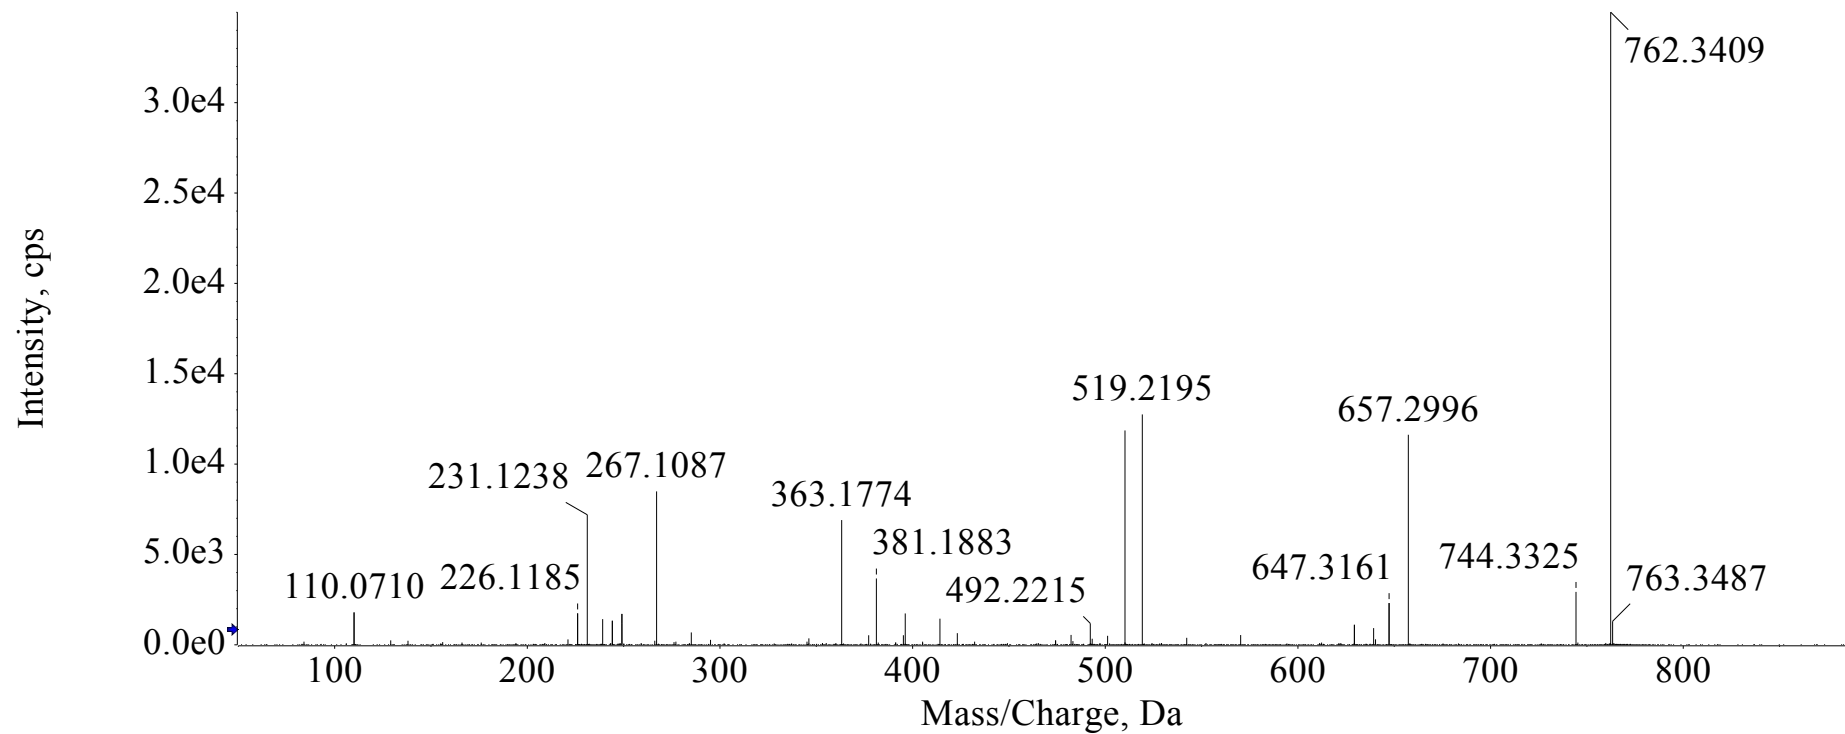

3

Spectrum from mass20181030.wiff2 (sample 8) - 4, Experiment 5, +IDA TOF MSMS (50 - 1500) from 0.070 min  
Precursor: 718.4 Da, +1, CE: 35.0

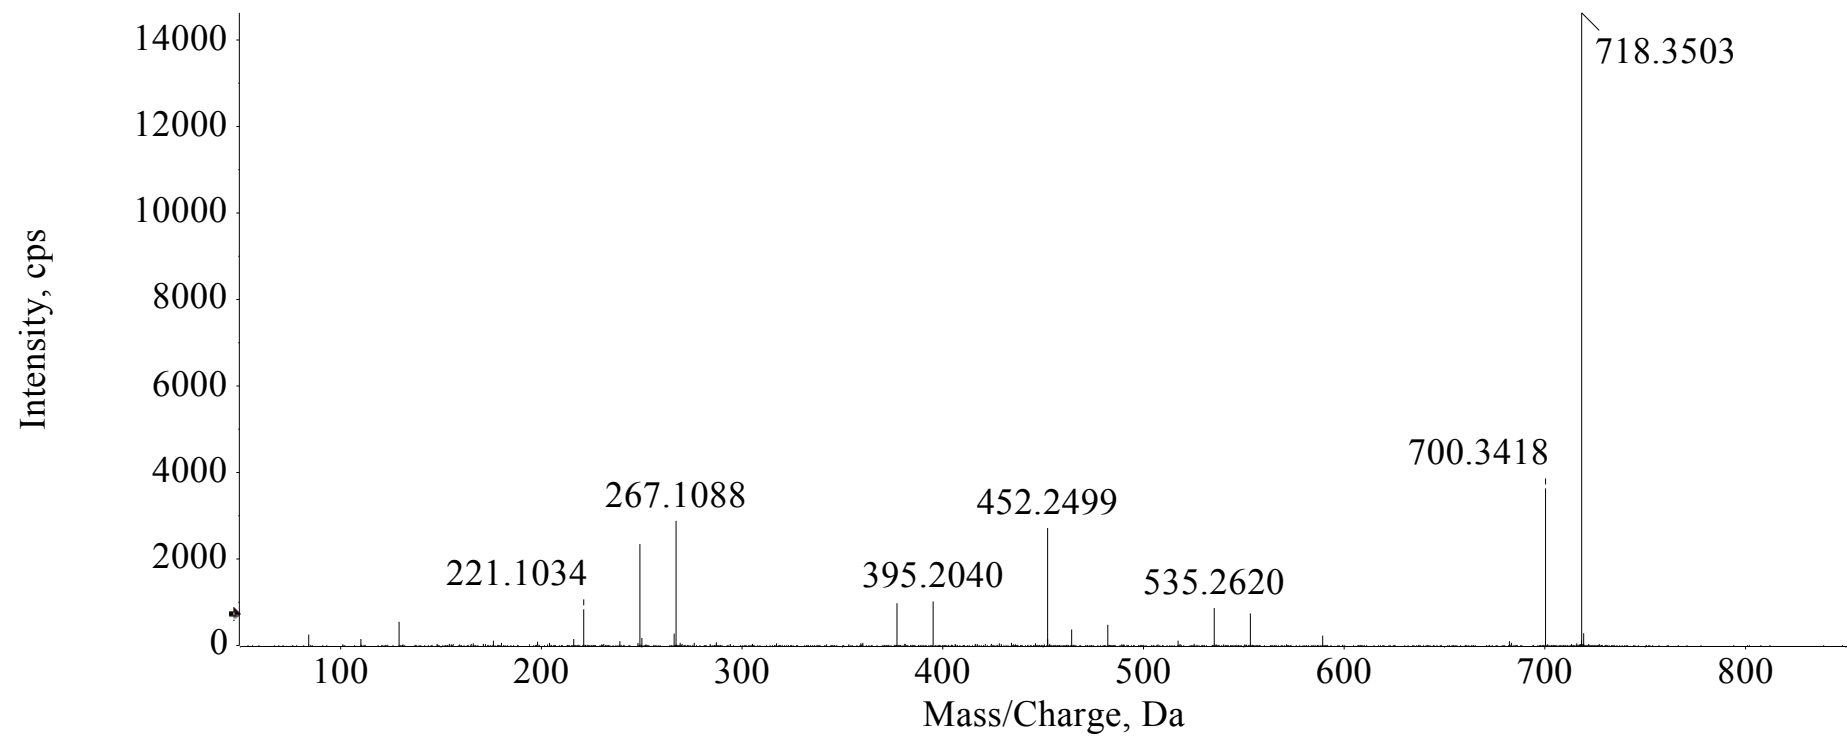

Spectrum from mass20181030.wiff2 (sample 10) - 5, Experiment 7, +IDA TOF MSMS (50 - 1500) from 0.070 min  
Precursor: 774.4 Da, +1, CE: 35.0

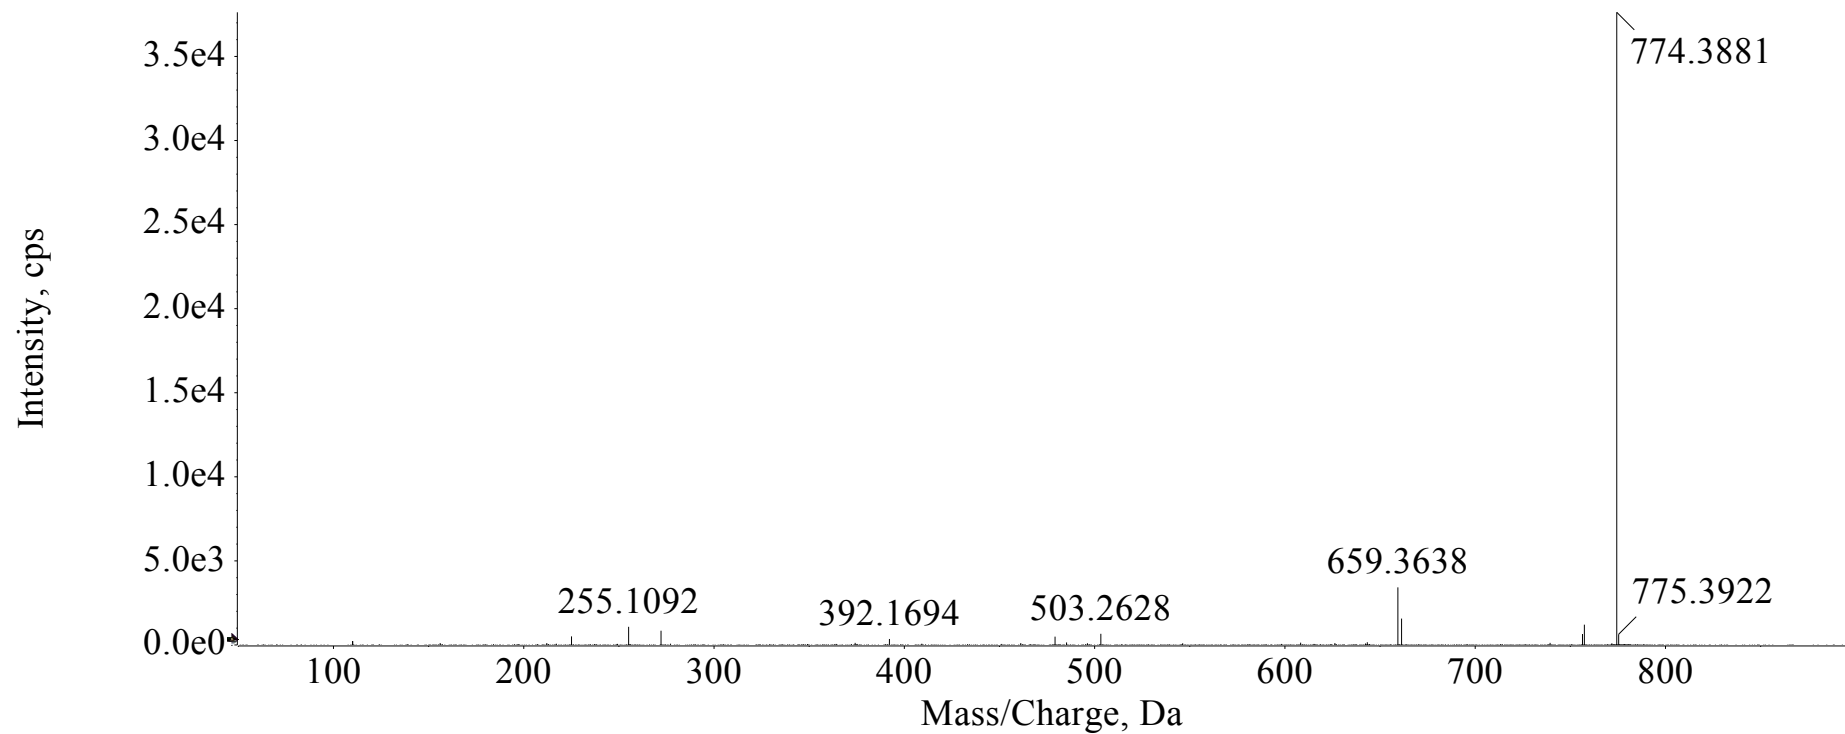

Spectrum from mass20181030.wiff2 (sample 12) - 6, Experiment 6, +IDA TOF MSMS (50 - 1500) from 0.069 min  
Precursor: 546.2 Da, +1, CE: 35.0

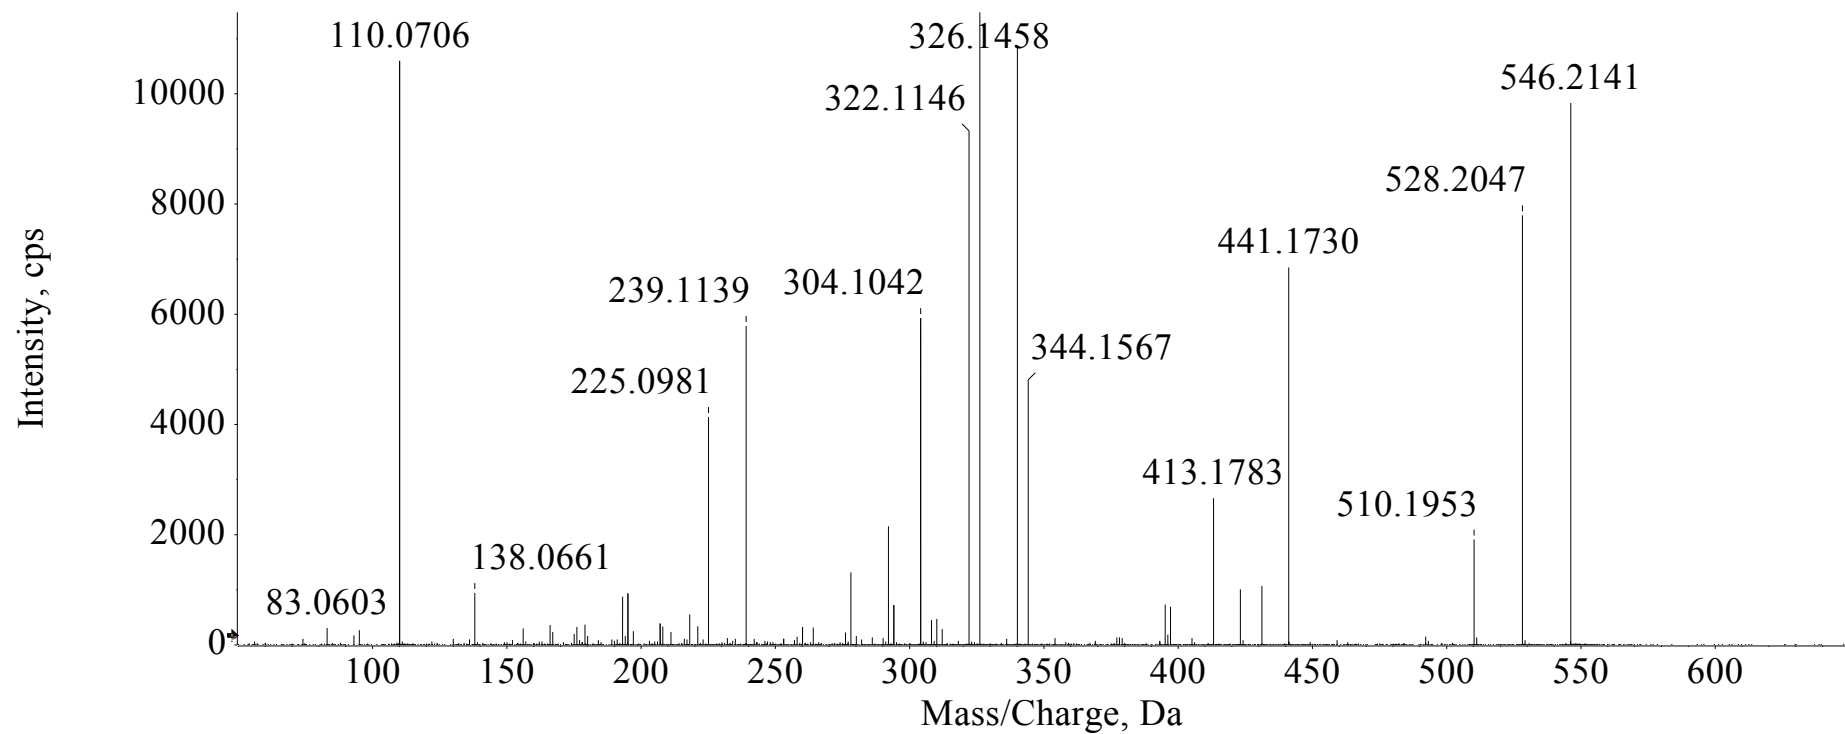

Spectrum from mass20181030.wiff2 (sample 16) - 8, Experiment 10, +IDA TOF MSMS (50 - 1500) from 0.082 min  
Precursor: 757.4 Da, +1, CE: 35.0

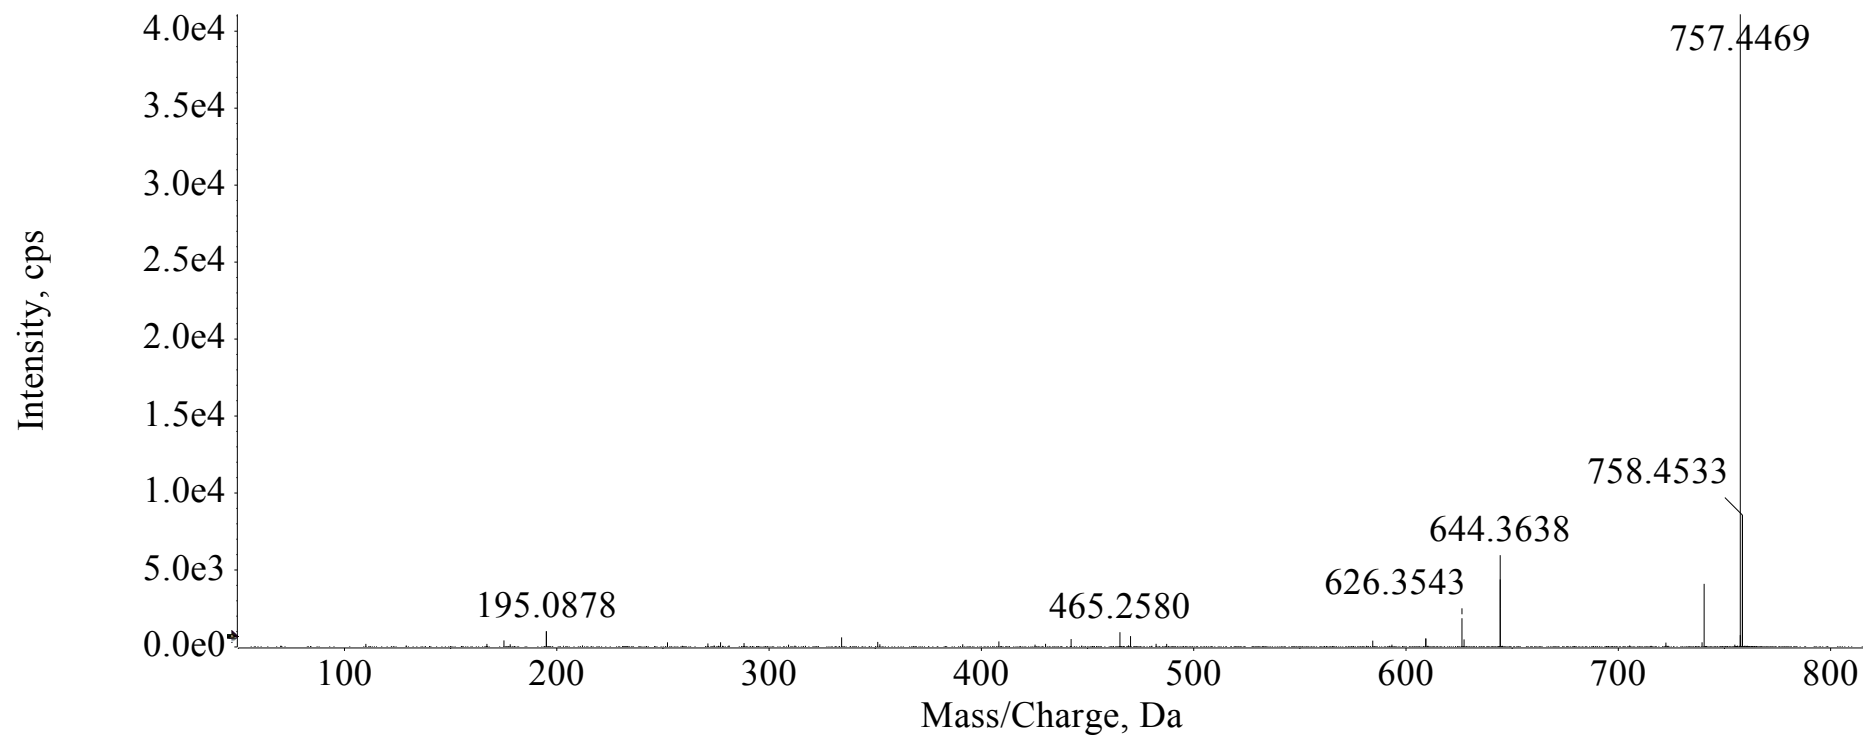

Spectrum from mass20181030.wiff2 (sample 22) - 11, Experiment 10, +IDA TOF MSMS (50 - 1500) from 0.071 min  
Precursor: 704.4 Da, +1, CE: 35.0

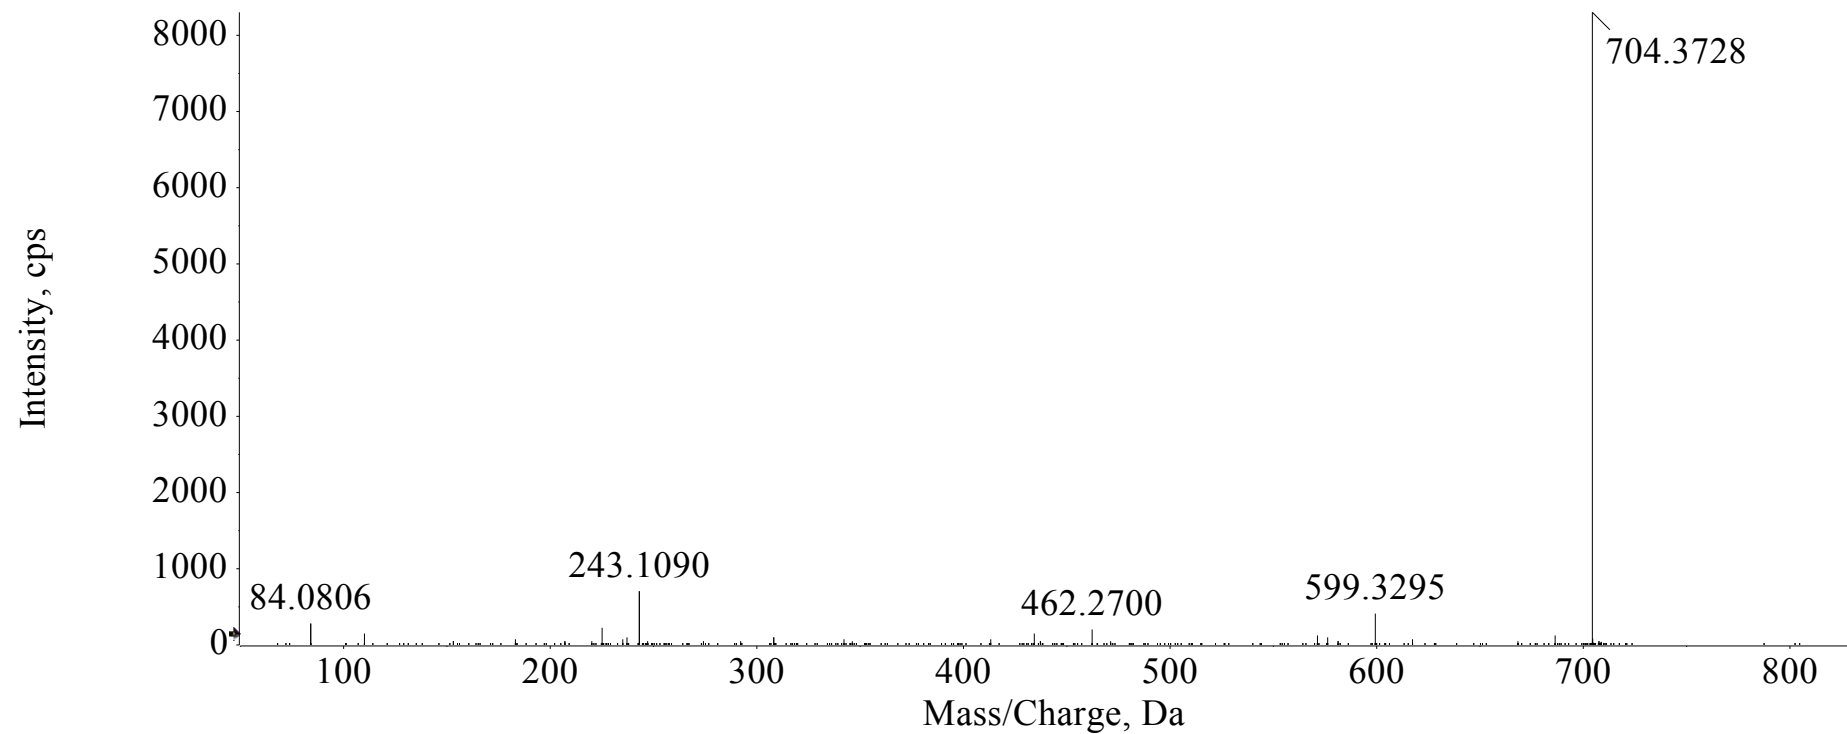

Spectrum from mass20181030.wiff2 (sample 28) - 14, Experiment 9, +IDA TOF MSMS (50 - 1500) from 0.070 min  
Precursor: 767.4 Da, +1, CE: 35.0

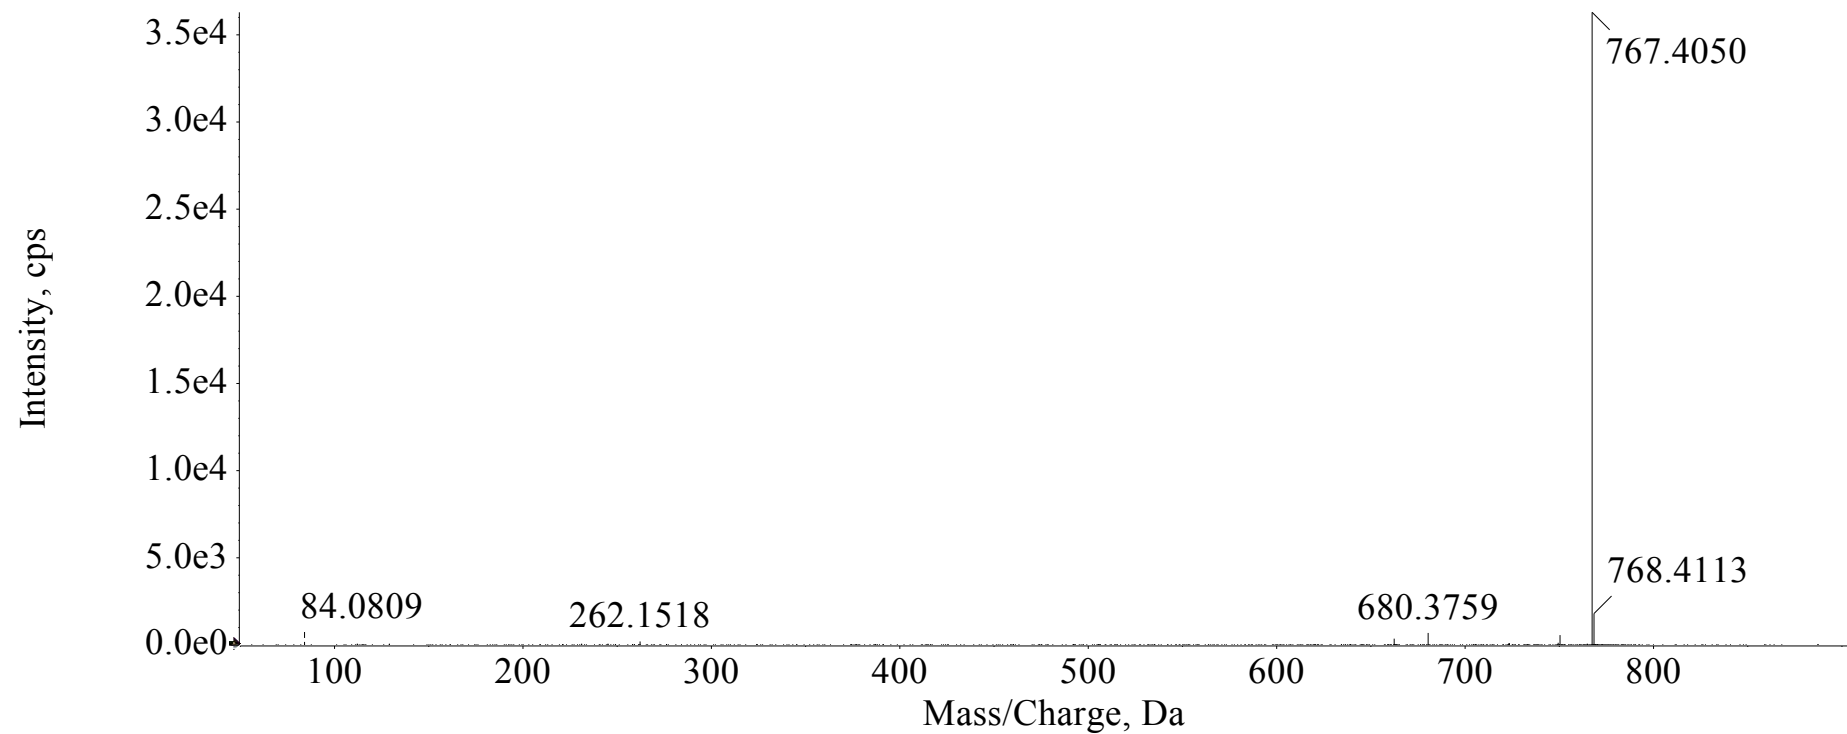

Spectrum from mass20181030.wiff2 (sample 30) - 15, Experiment 11, +IDA TOF MSMS (50 - 1500) from 0.072 min  
Precursor: 854.4 Da, +1, CE: 35.0

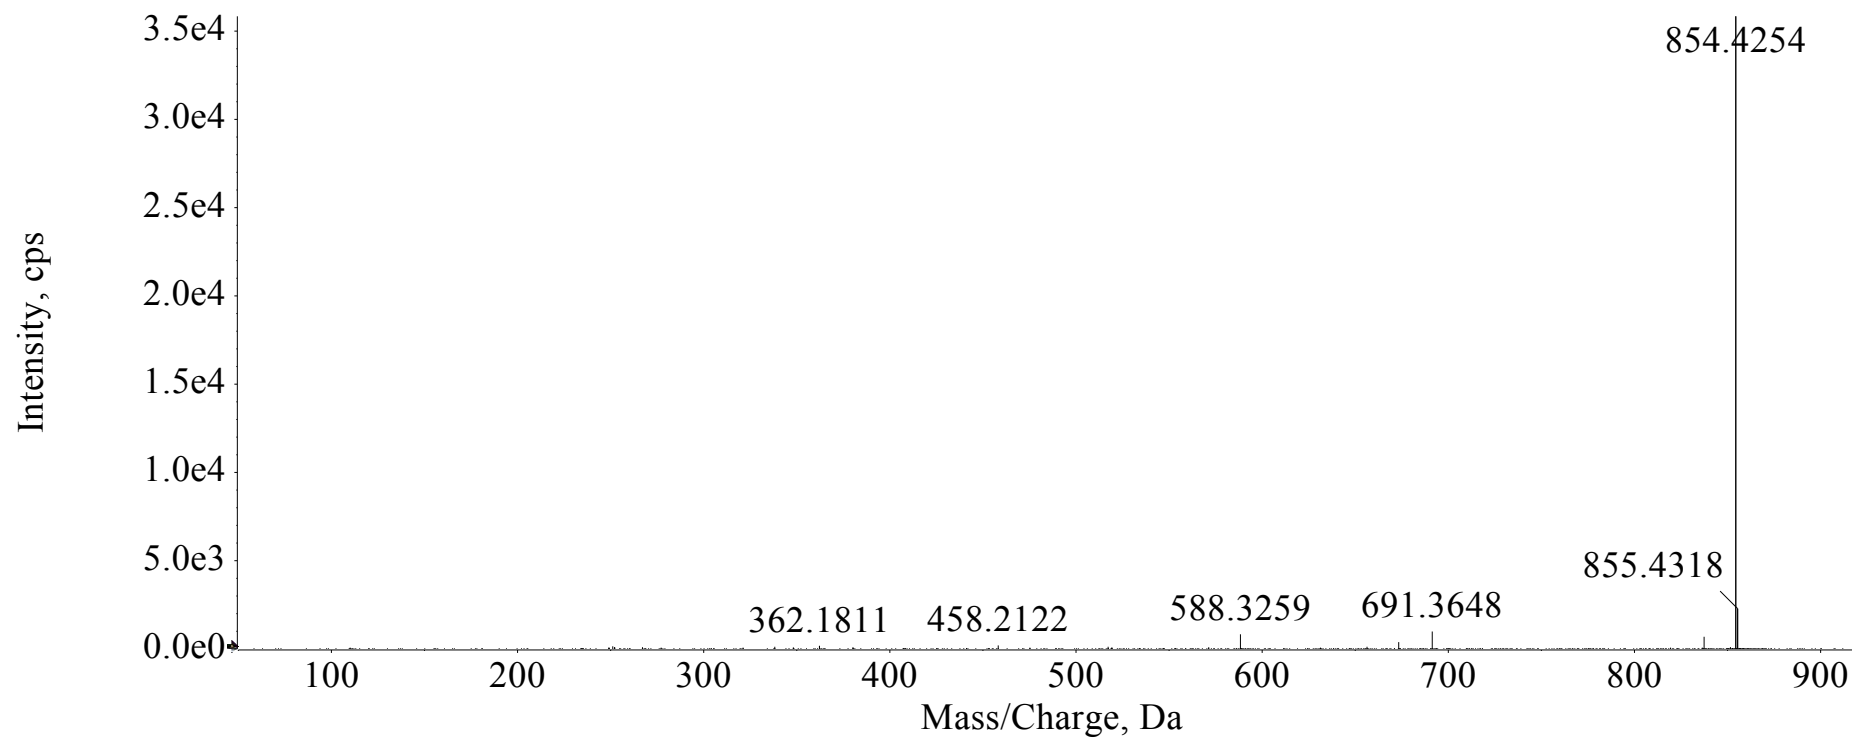



Spectrum from mass20181030.wiff2 (sample 32) - 16, Experiment 6, +IDA TOF MSMS (50 - 1500) from 0.070 min  
Precursor: 784.3 Da, +1, CE: 35.0

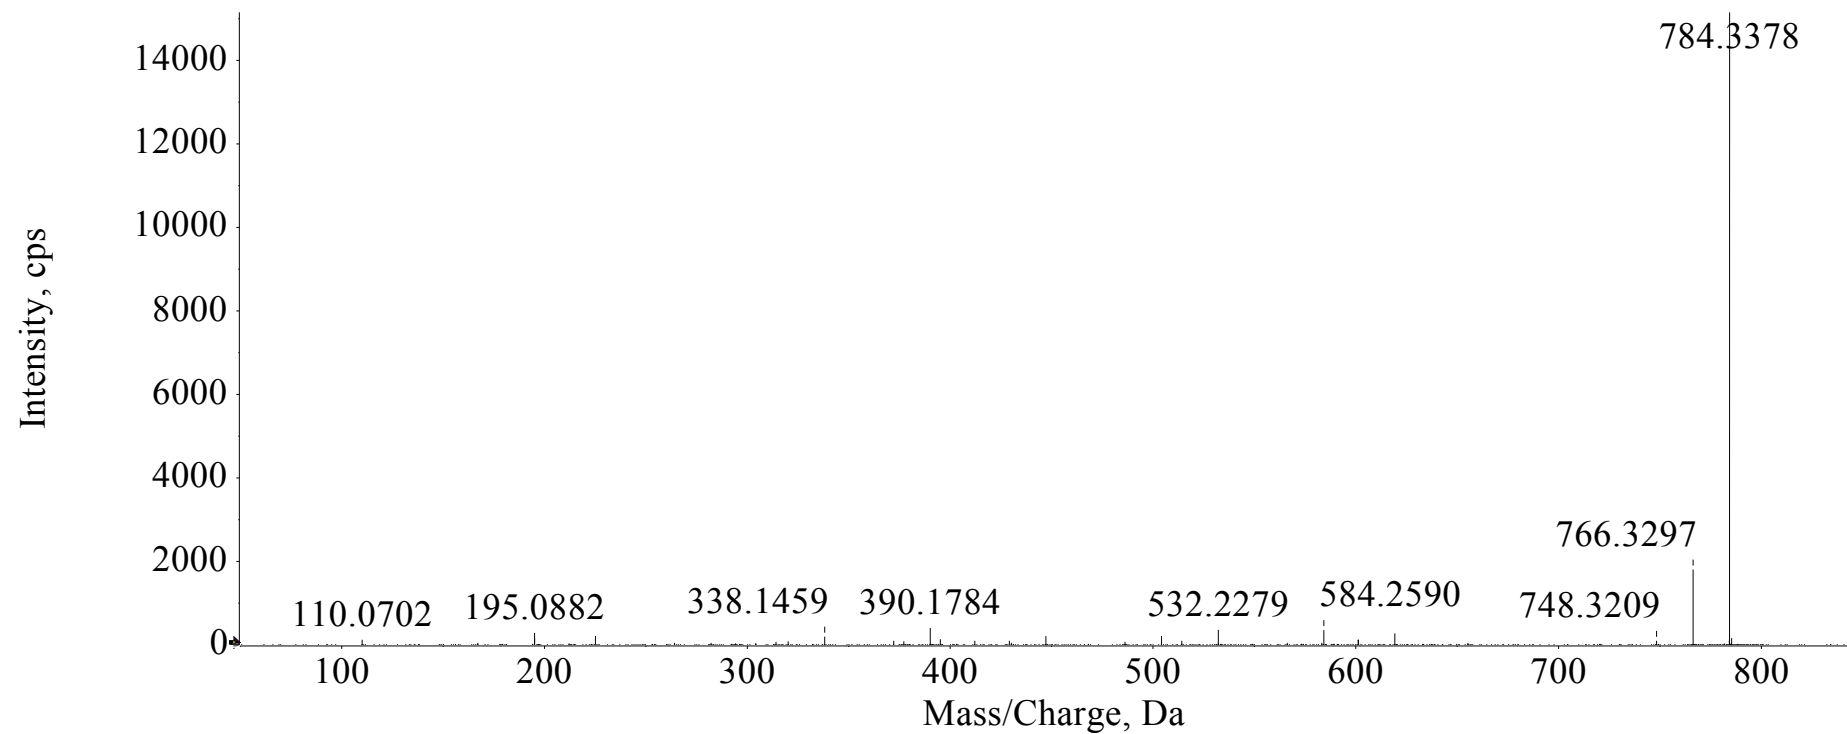

Spectrum from mass20181030.wiff2 (sample 34) - 17, Experiment 10, +IDA TOF MSMS (50 - 1500) from 0.071 min  
Precursor: 858.3 Da, +1, CE: 35.0

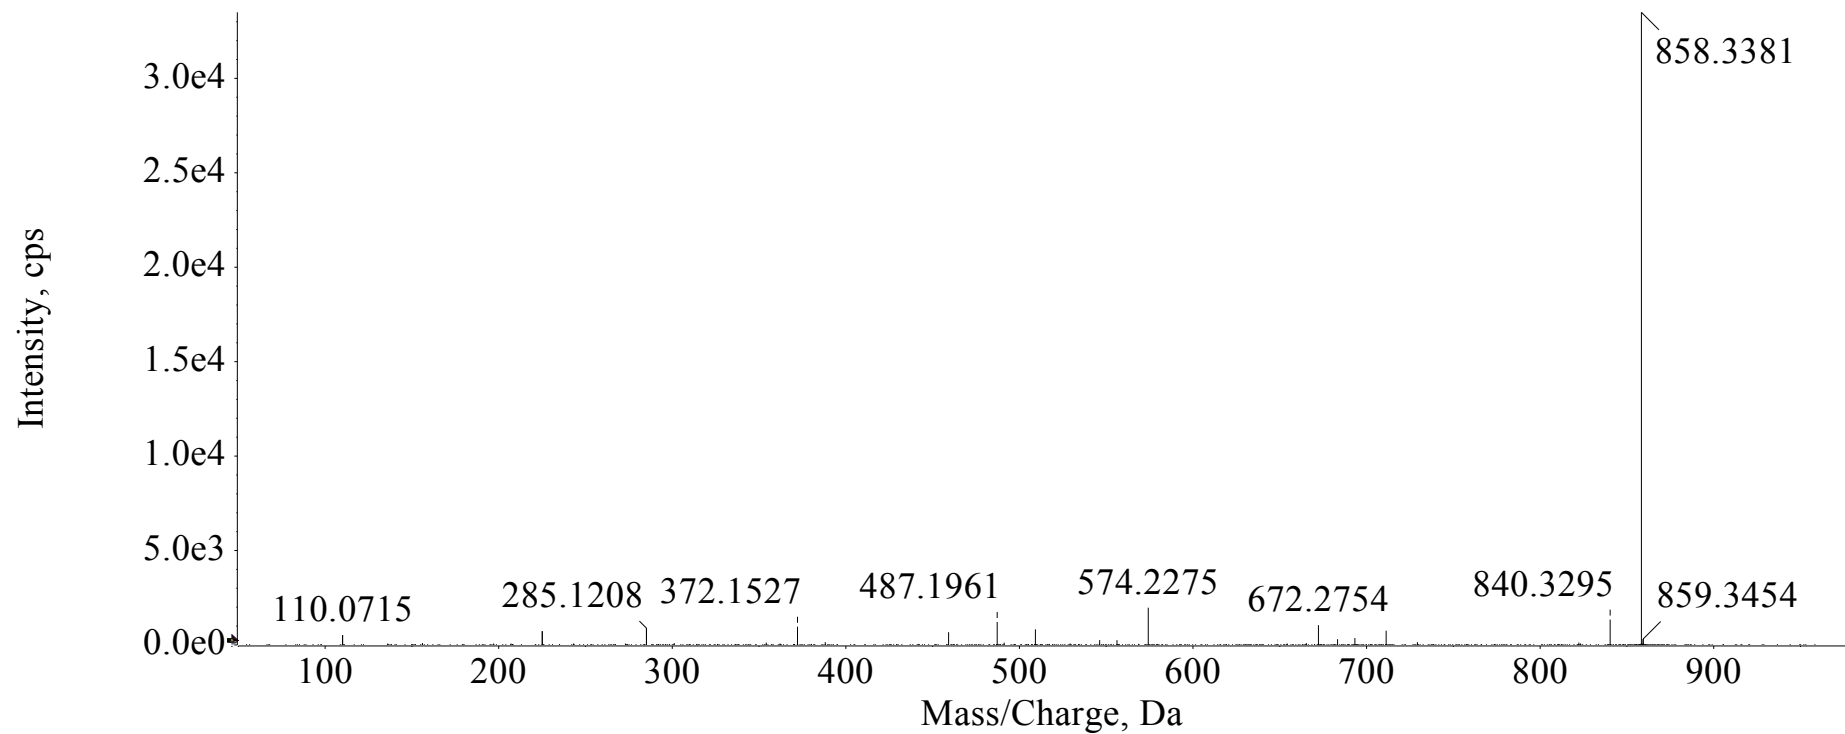

Spectrum from mass20181030.wiff2 (sample 36) - 18, Experiment 5, +IDA TOF MSMS (50 - 1500) from 0.068 min  
Precursor: 788.3 Da, +1, CE: 35.0

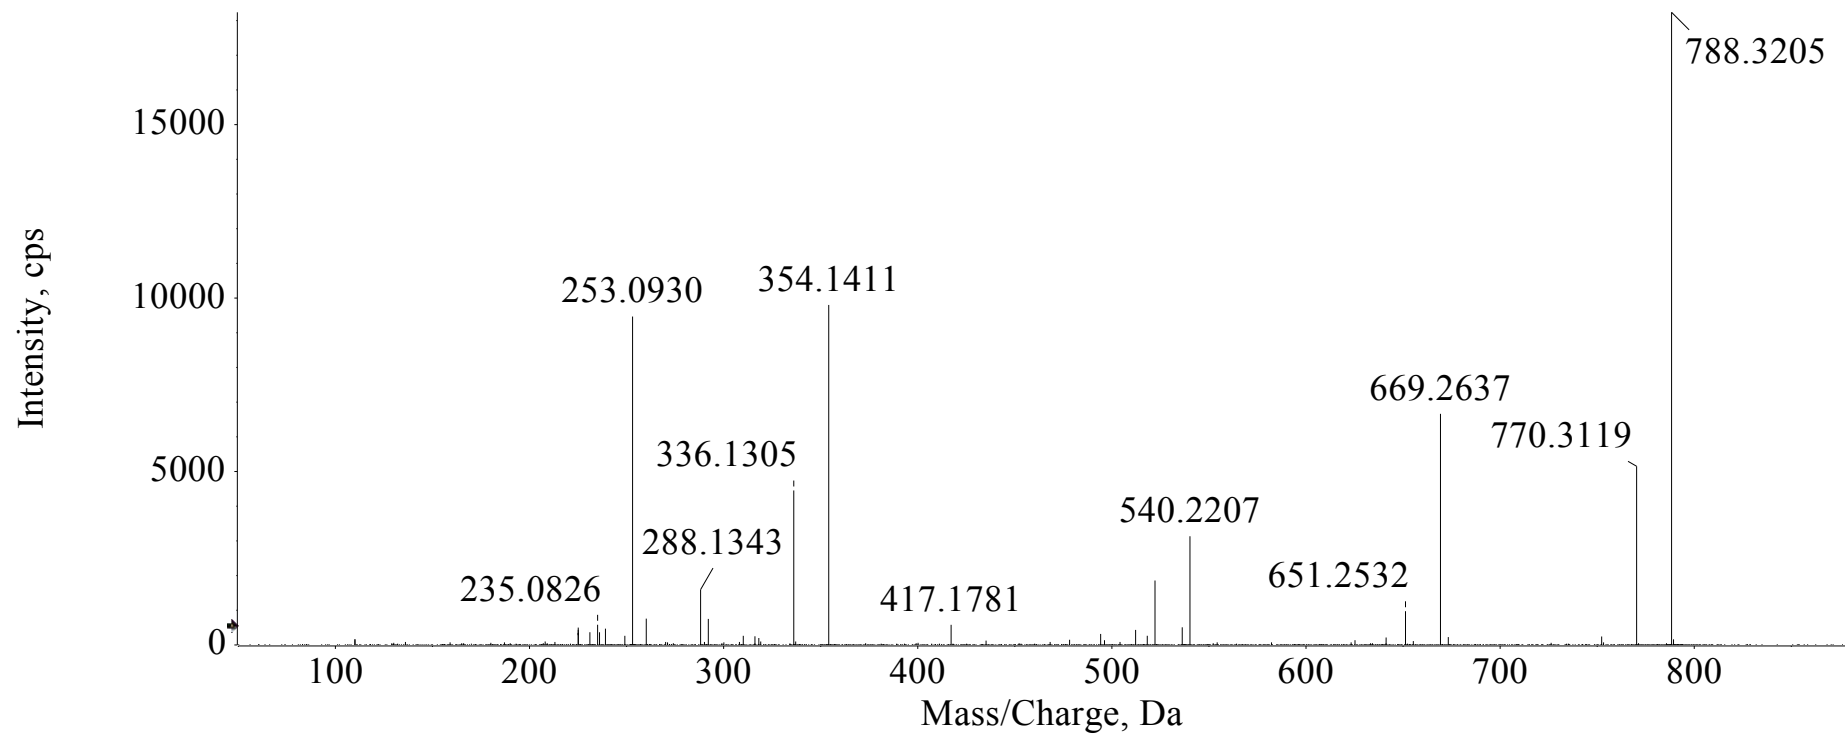

Spectrum from mass20181030.wiff2 (sample 38) - 19, Experiment 8, +IDA TOF MSMS (50 - 1500) from 0.069 min  
Precursor: 774.4 Da, +1, CE: 35.0

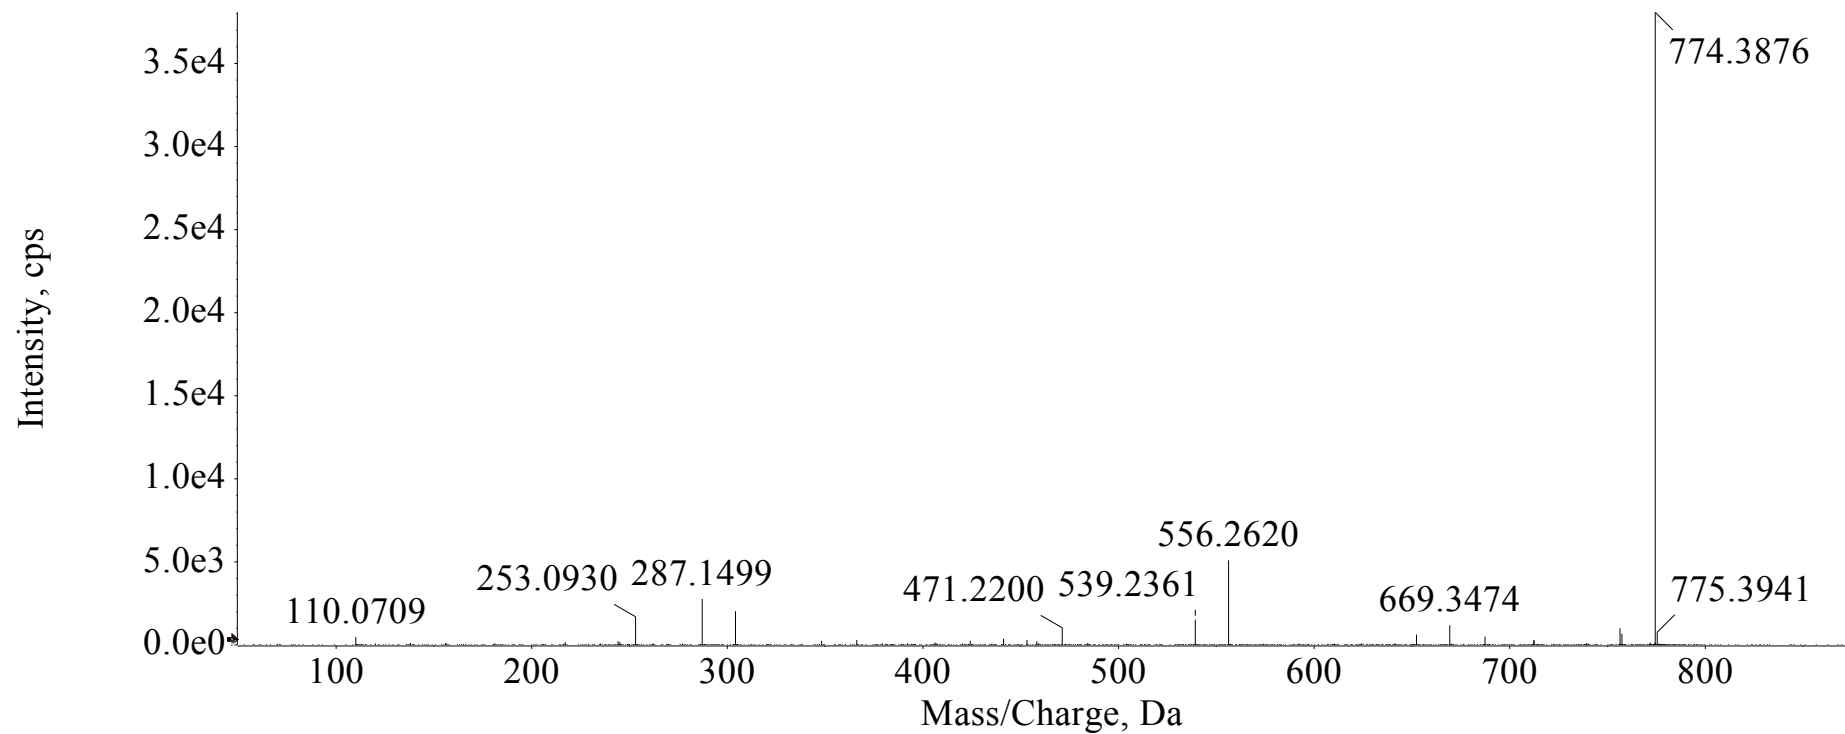

Spectrum from mass20181030.wiff2 (sample 40) - 20, Experiment 11, +IDA TOF MSMS (50 - 1500) from 0.072 min  
Precursor: 734.4 Da, +1, CE: 35.0

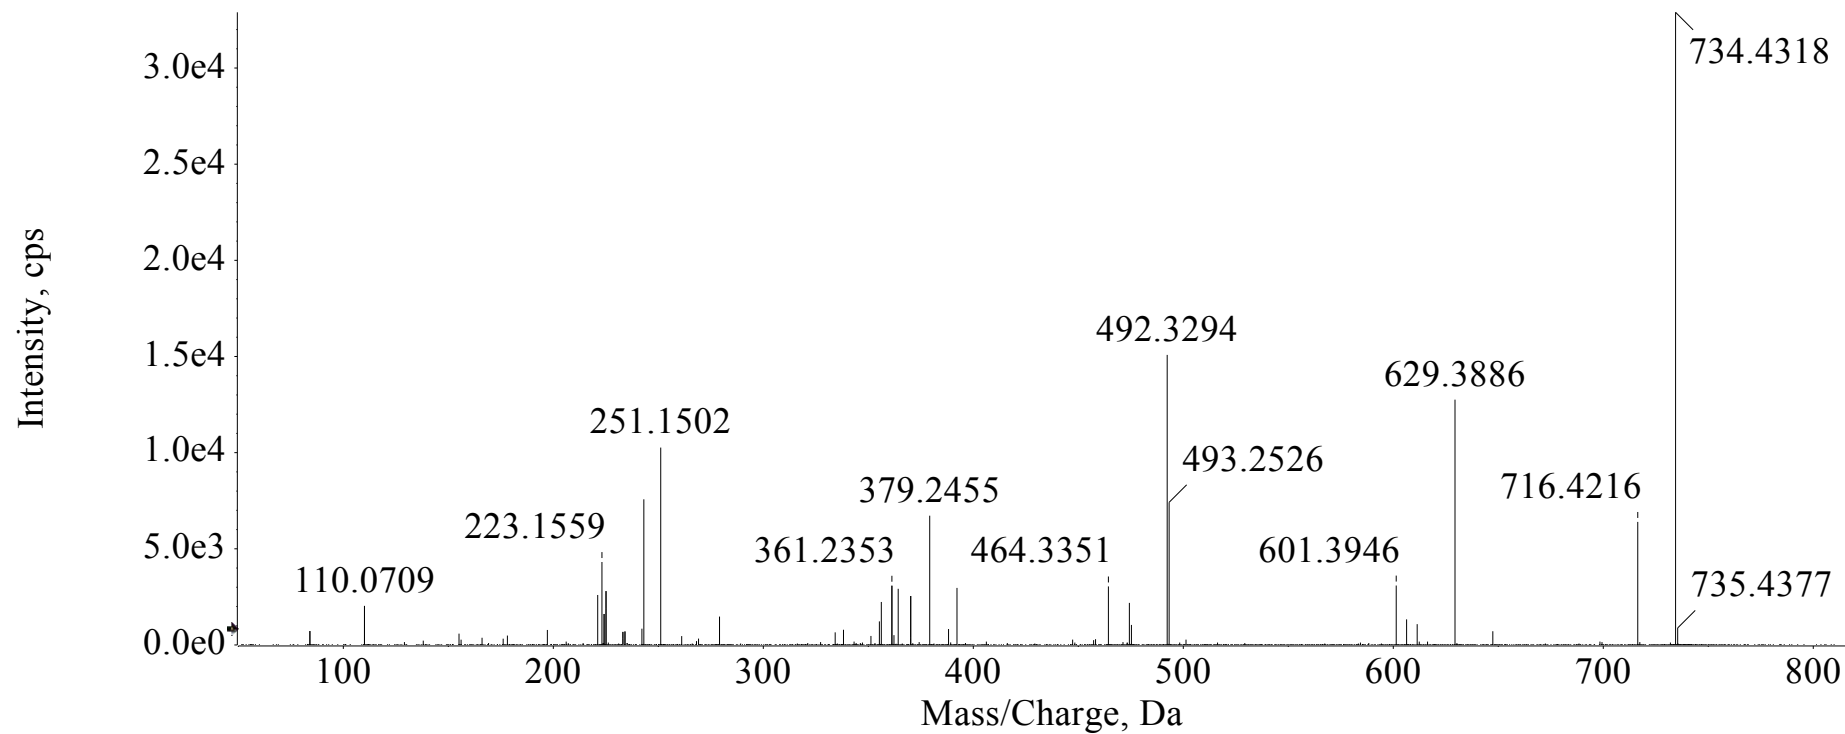

Spectrum from mass20181030.wiff2 (sample 44) - 22, Experiment 5, +IDA TOF MSMS (50 - 1500) from 0.070 min  
Precursor: 495.8 Da, +2, CE: 35.0

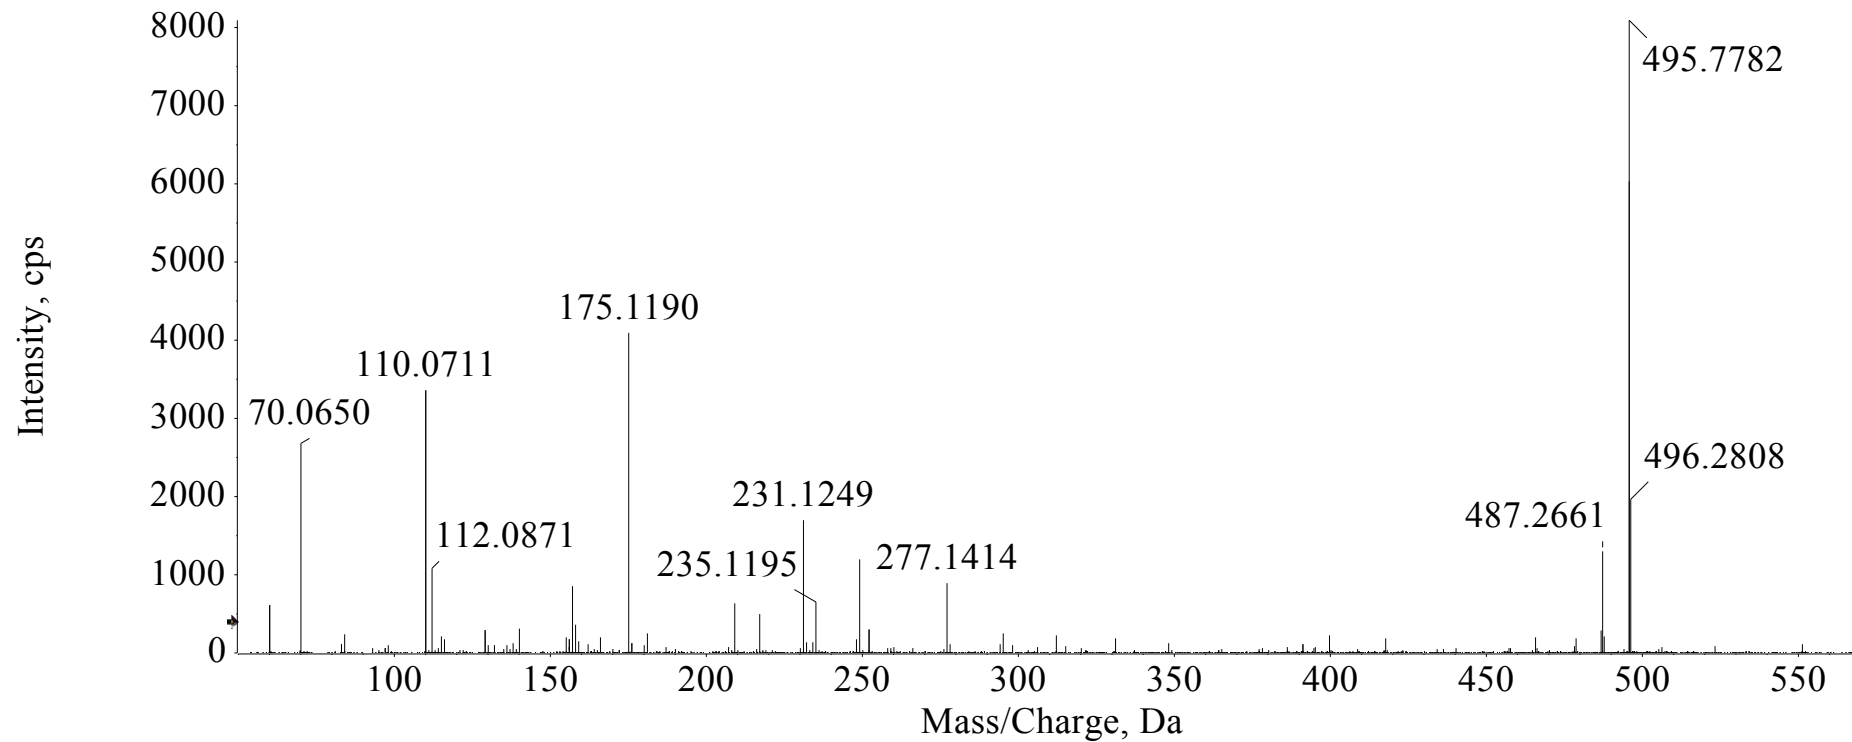

Spectrum from mass20181030.wiff2 (sample 46) - 23, Experiment 9, +IDA TOF MSMS (50 - 1500) from 0.070 min  
Precursor: 778.3 Da, +1, CE: 35.0

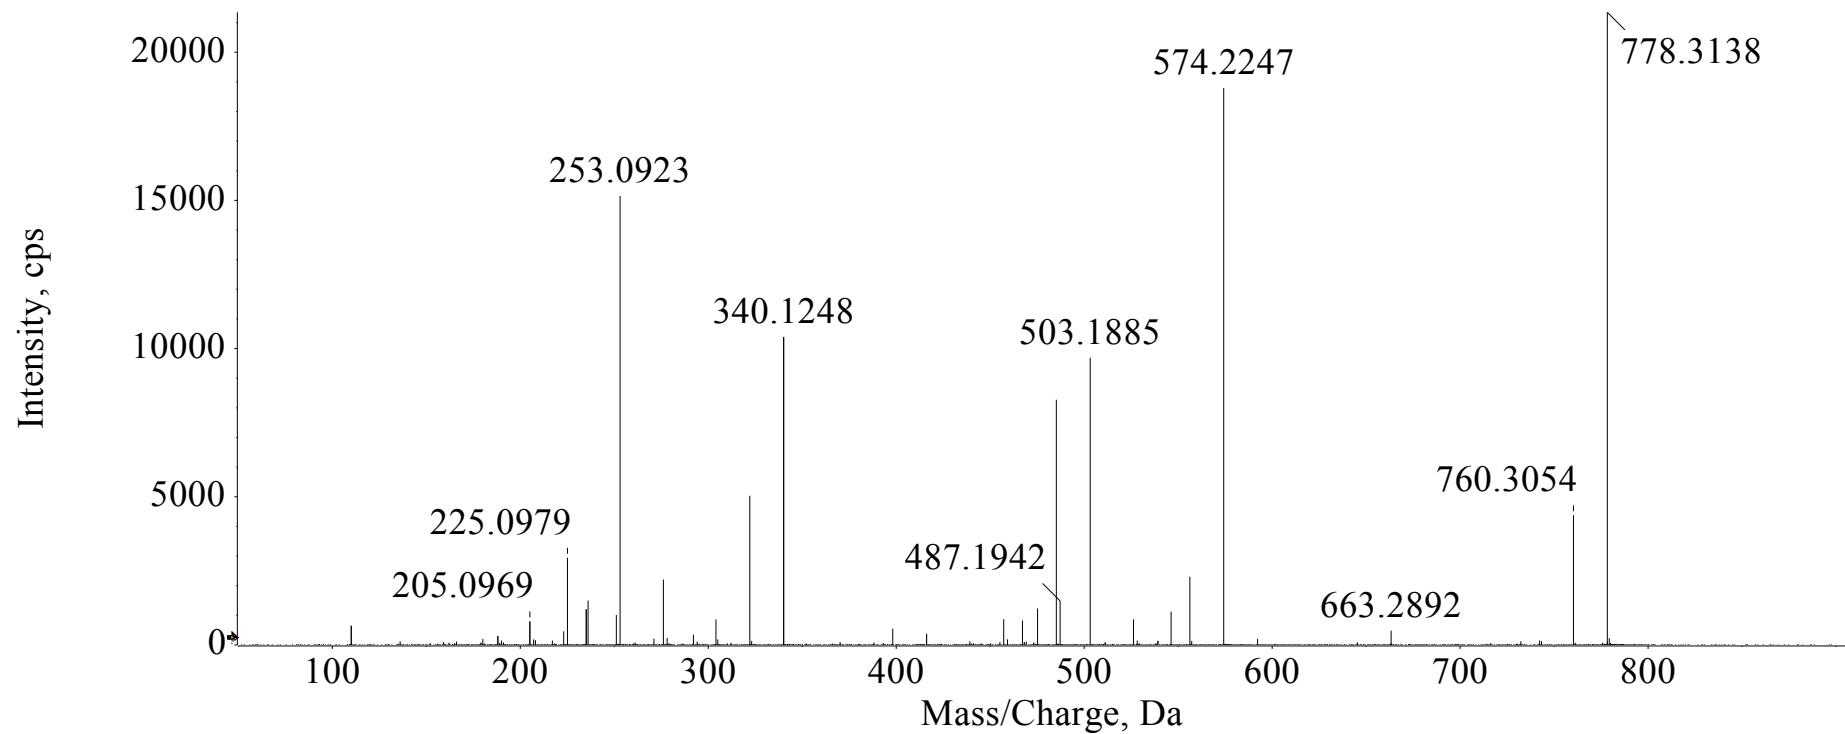

Spectrum from mass20181030.wiff2 (sample 48) - 24, Experiment 3, +IDA TOF MSMS (50 - 1500) from 0.067 min  
Precursor: 276.2 Da, +1, CE: 35.0

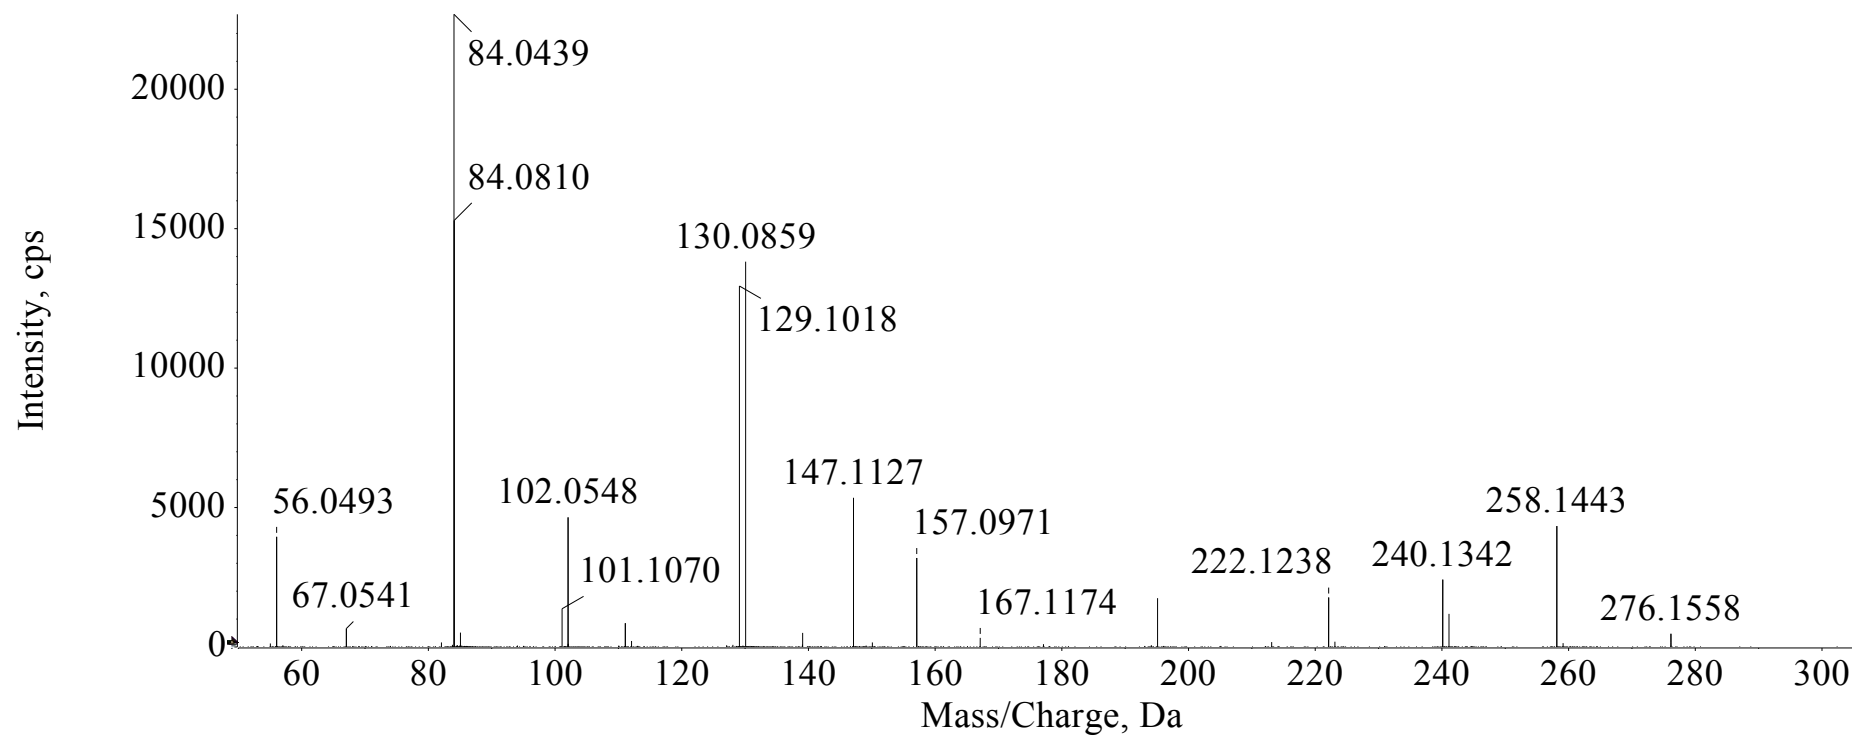



Spectrum from mass20181030.wiff2 (sample 50) - 25, Experiment 11, +IDA TOF MSMS (50 - 1500) from 0.072 min  
Precursor: 679.3 Da, +1, CE: 35.0

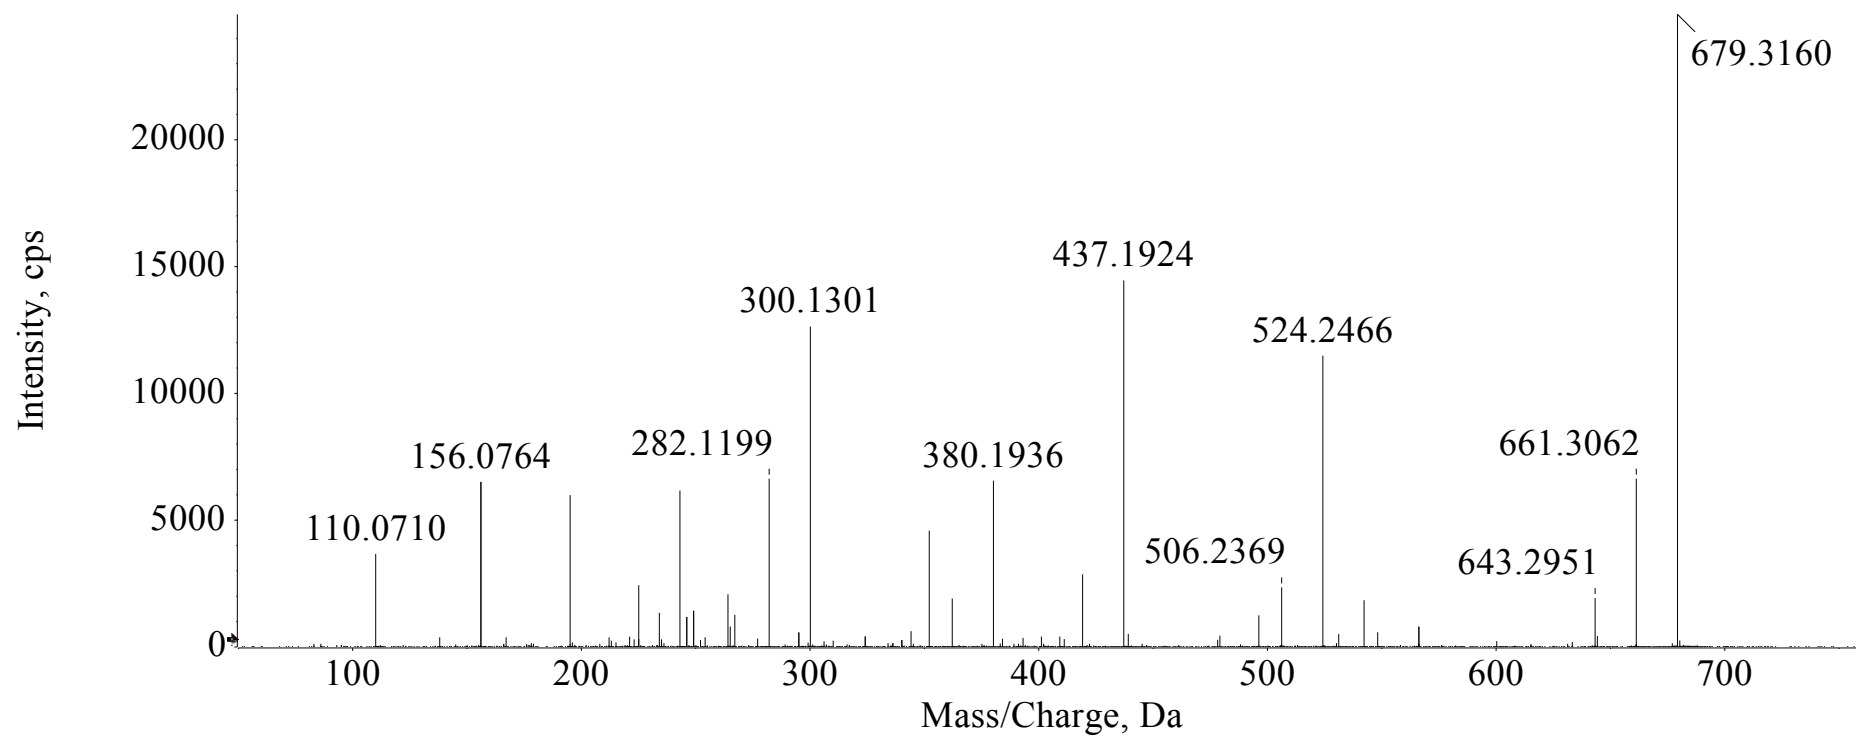

Spectrum from mass20181030.wiff2 (sample 52) - 26, Experiment 5, +IDA TOF MSMS (50 - 1500) from 0.068 min  
Precursor: 333.2 Da, +1, CE: 35.0

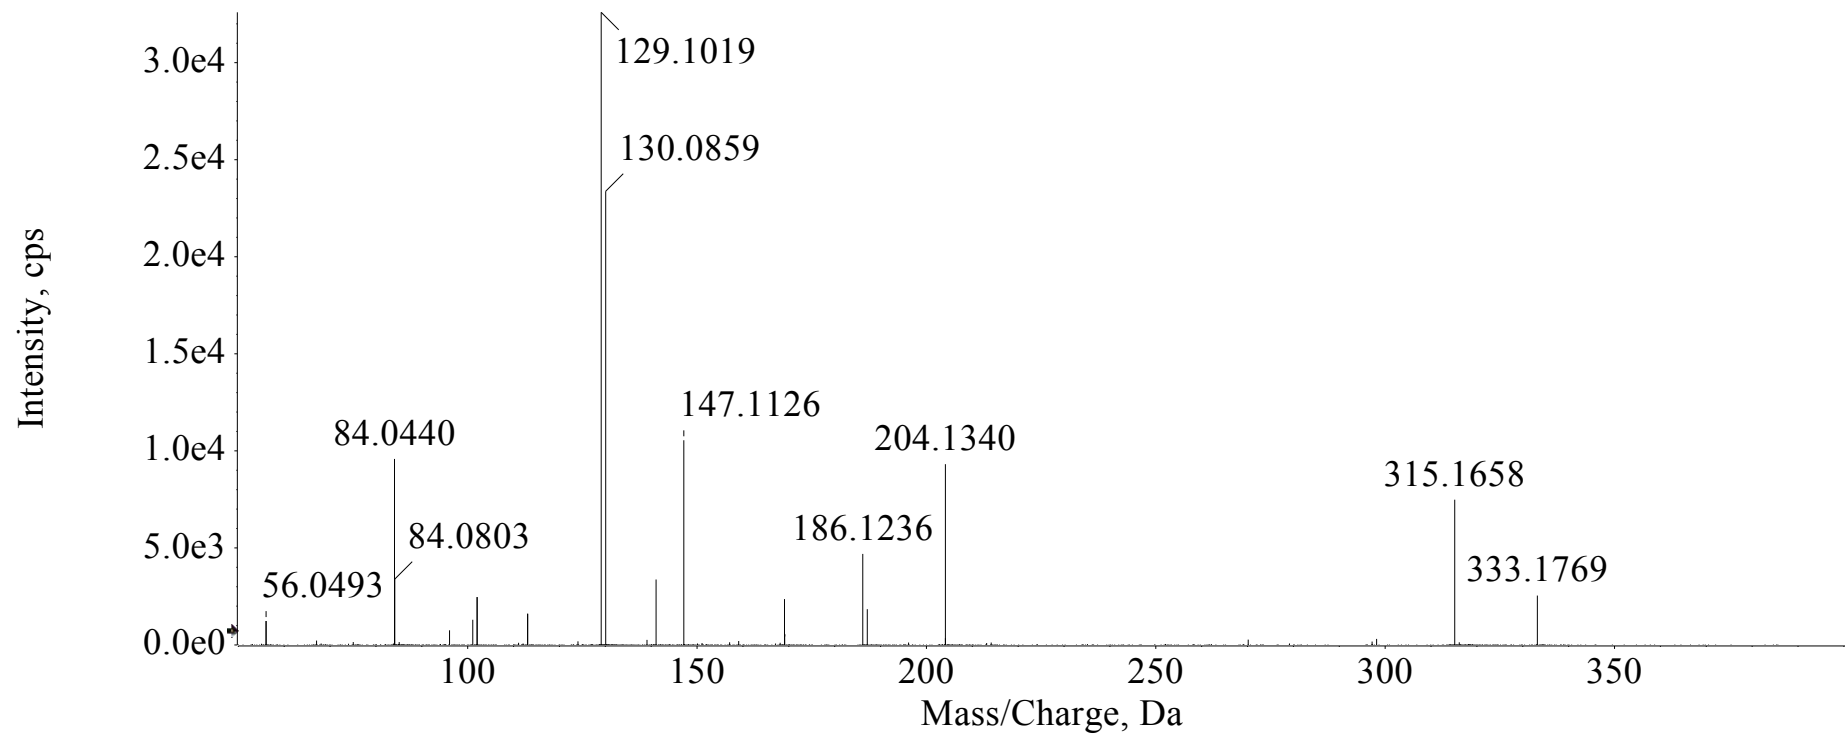

Spectrum from mass20181030.wiff2 (sample 58) - 29, Experiment 9, +IDA TOF MSMS (50 - 1500) from 0.070 min  
Precursor: 413.2 Da, +1, CE: 35.0

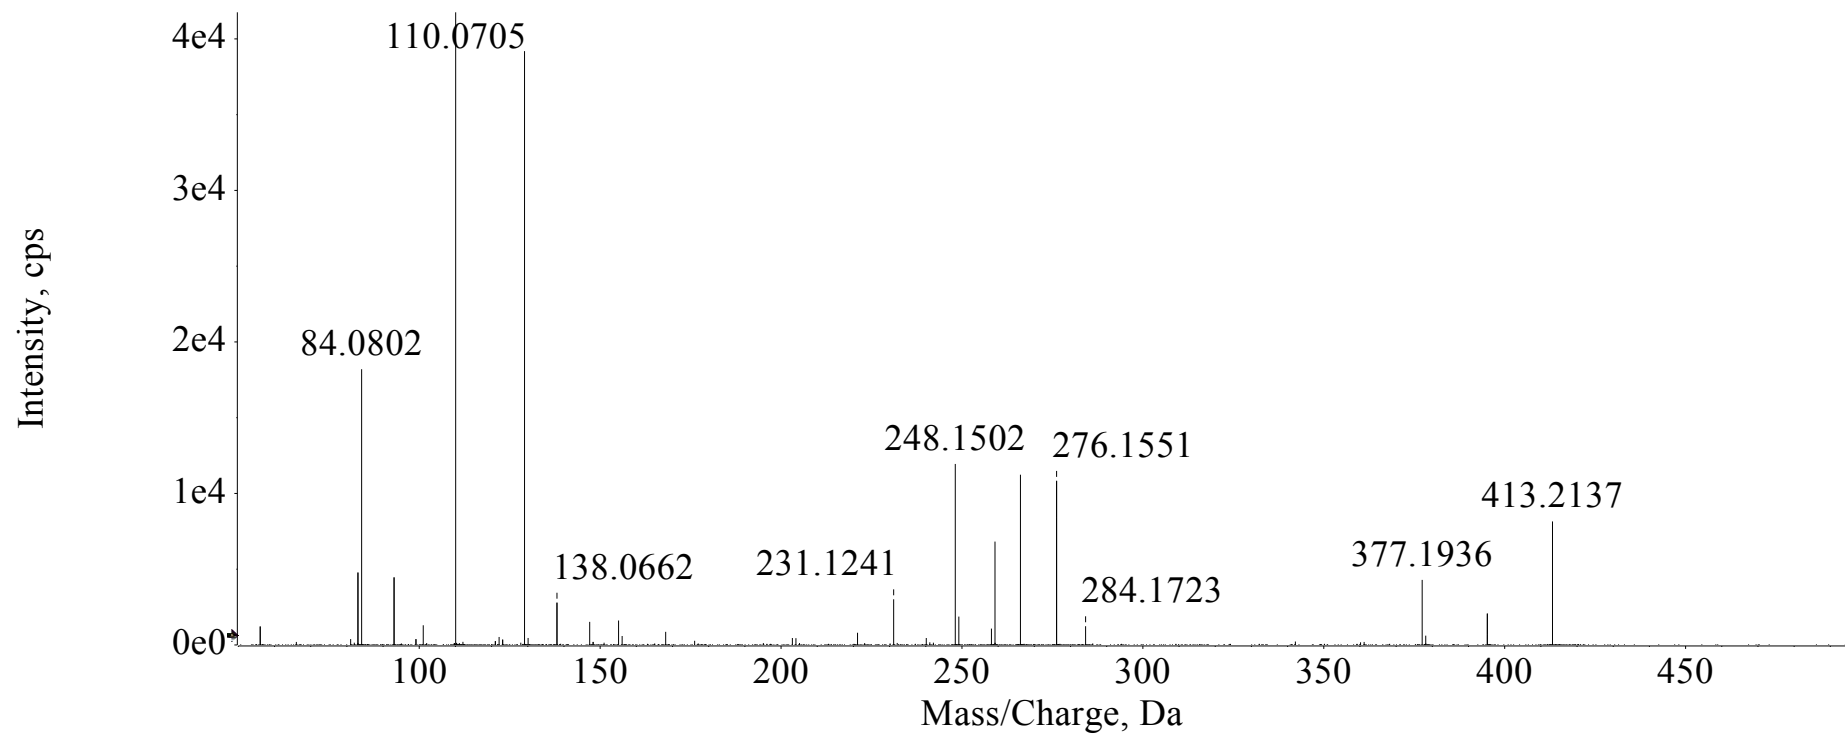

Spectrum from mass20181030.wiff2 (sample 64) - 32, Experiment 9, +IDA TOF MSMS (50 - 1500) from 0.070 min  
Precursor: 412.7 Da, +2, CE: 35.0

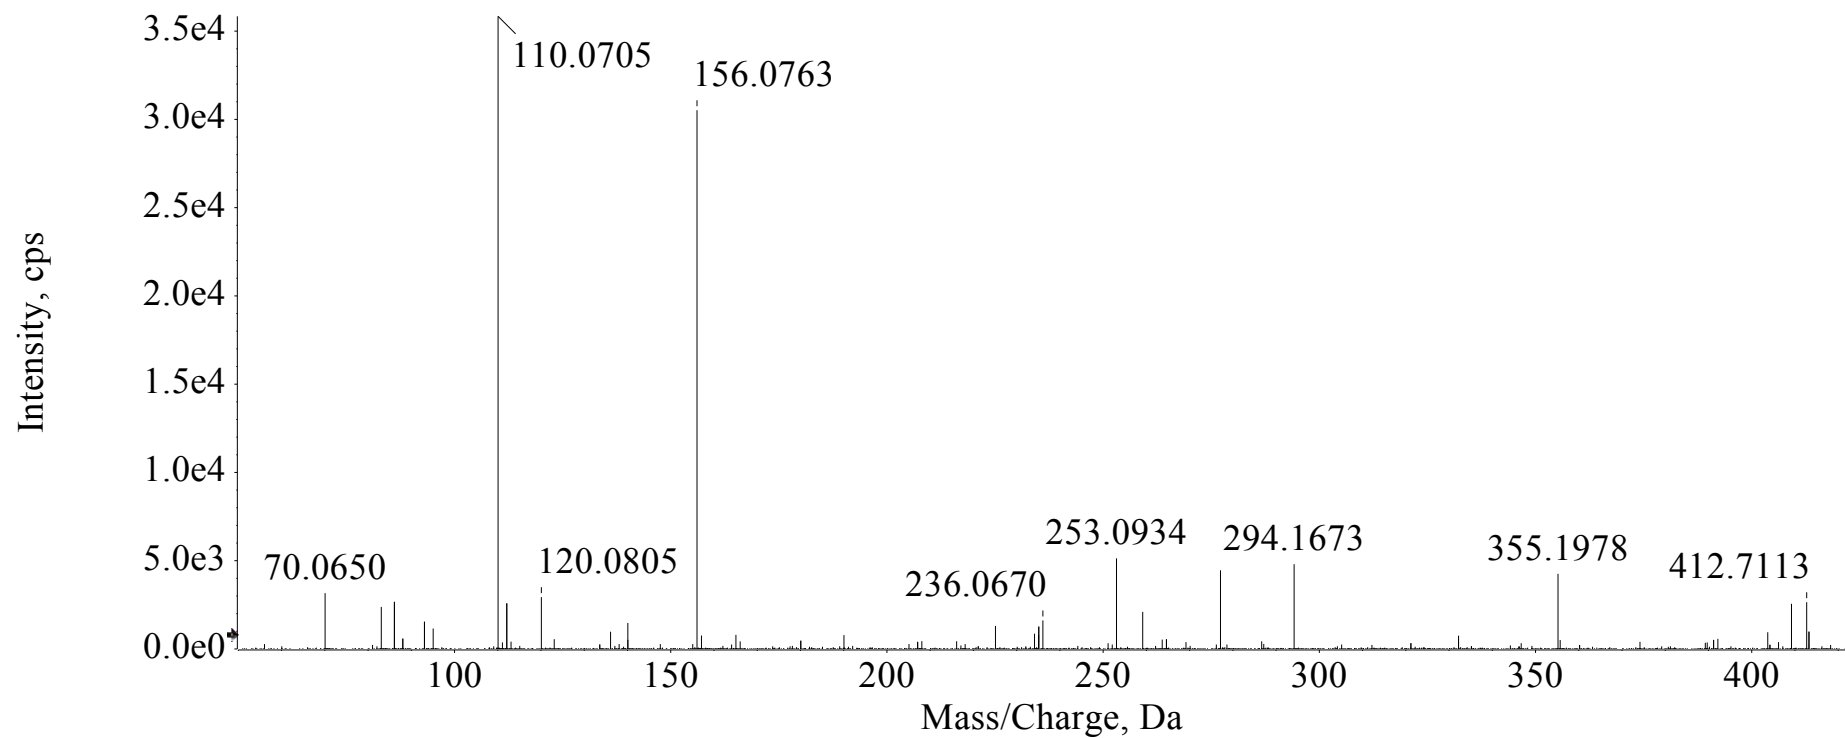

Spectrum from mass20181030.wiff2 (sample 66) - 33, Experiment 9, +IDA TOF MSMS (50 - 1500) from 0.070 min  
Precursor: 745.4 Da, +1, CE: 35.0

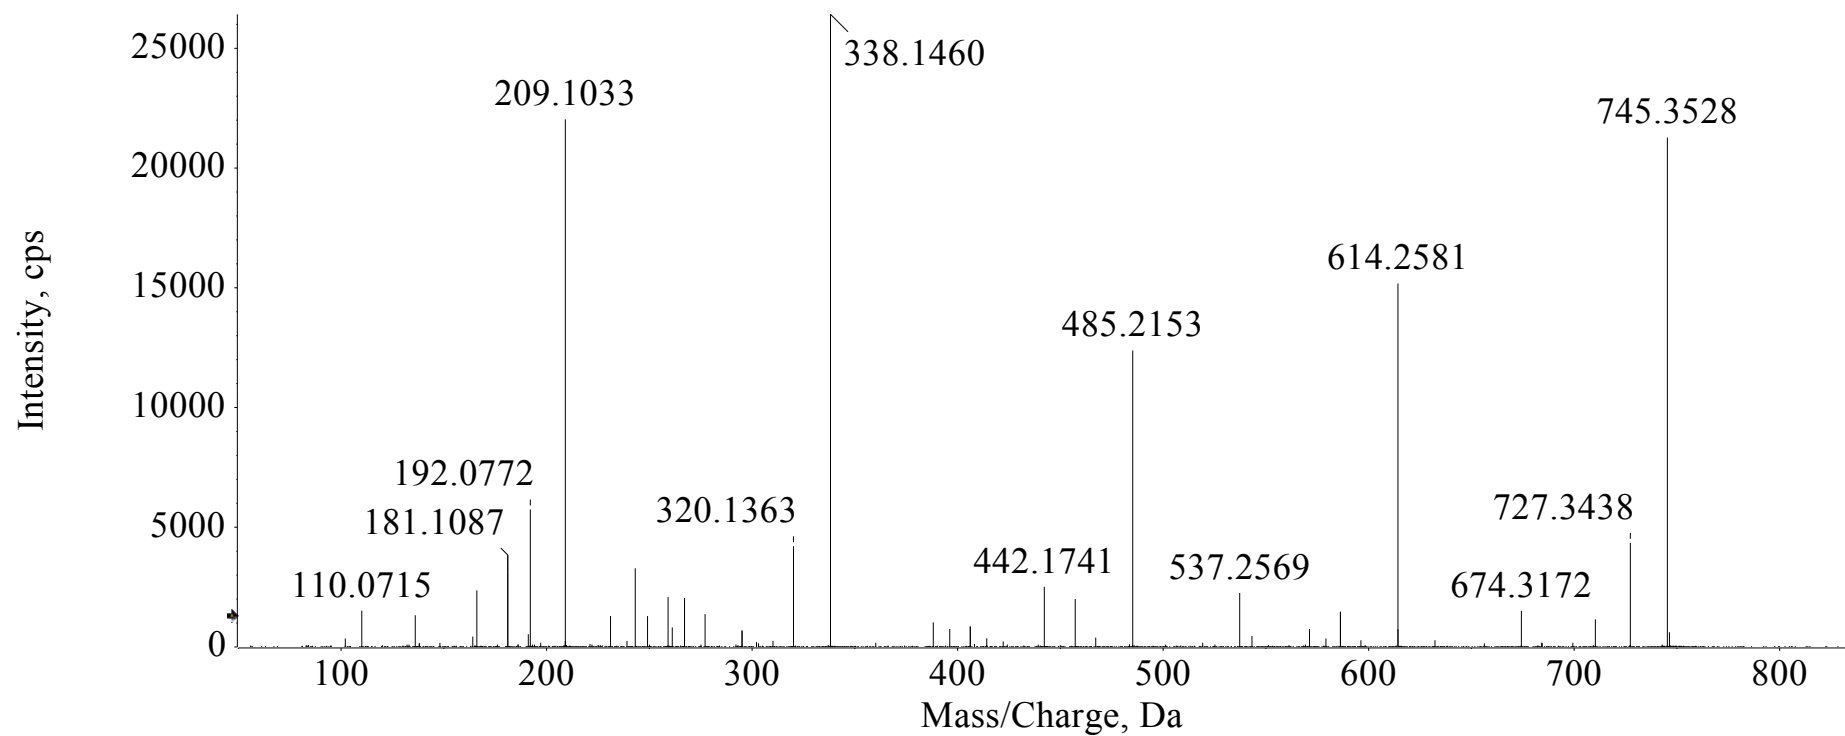

Spectrum from mass20181030.wiff2 (sample 68) - 34, Experiment 7, +IDA TOF MSMS (50 - 1500) from 0.068 min  
Precursor: 420.3 Da, +2, CE: 35.0

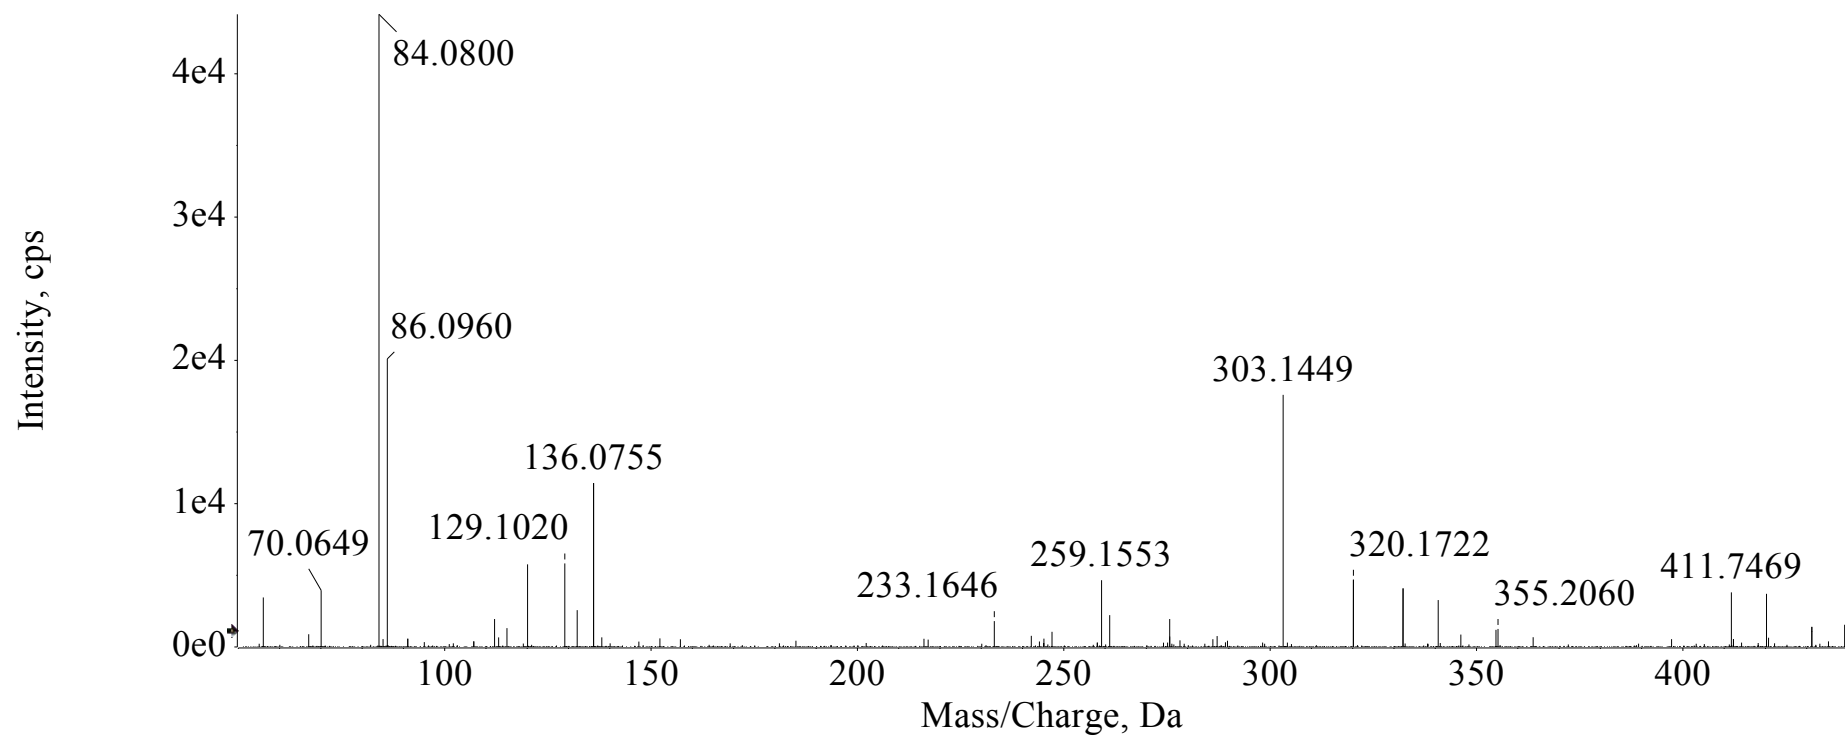

Spectrum from mass20181030.wiff2 (sample 68) - 34, Experiment 7, +IDA TOF MSMS (50 - 1500) from 0.068 min  
Precursor: 420.3 Da, +2, CE: 35.0

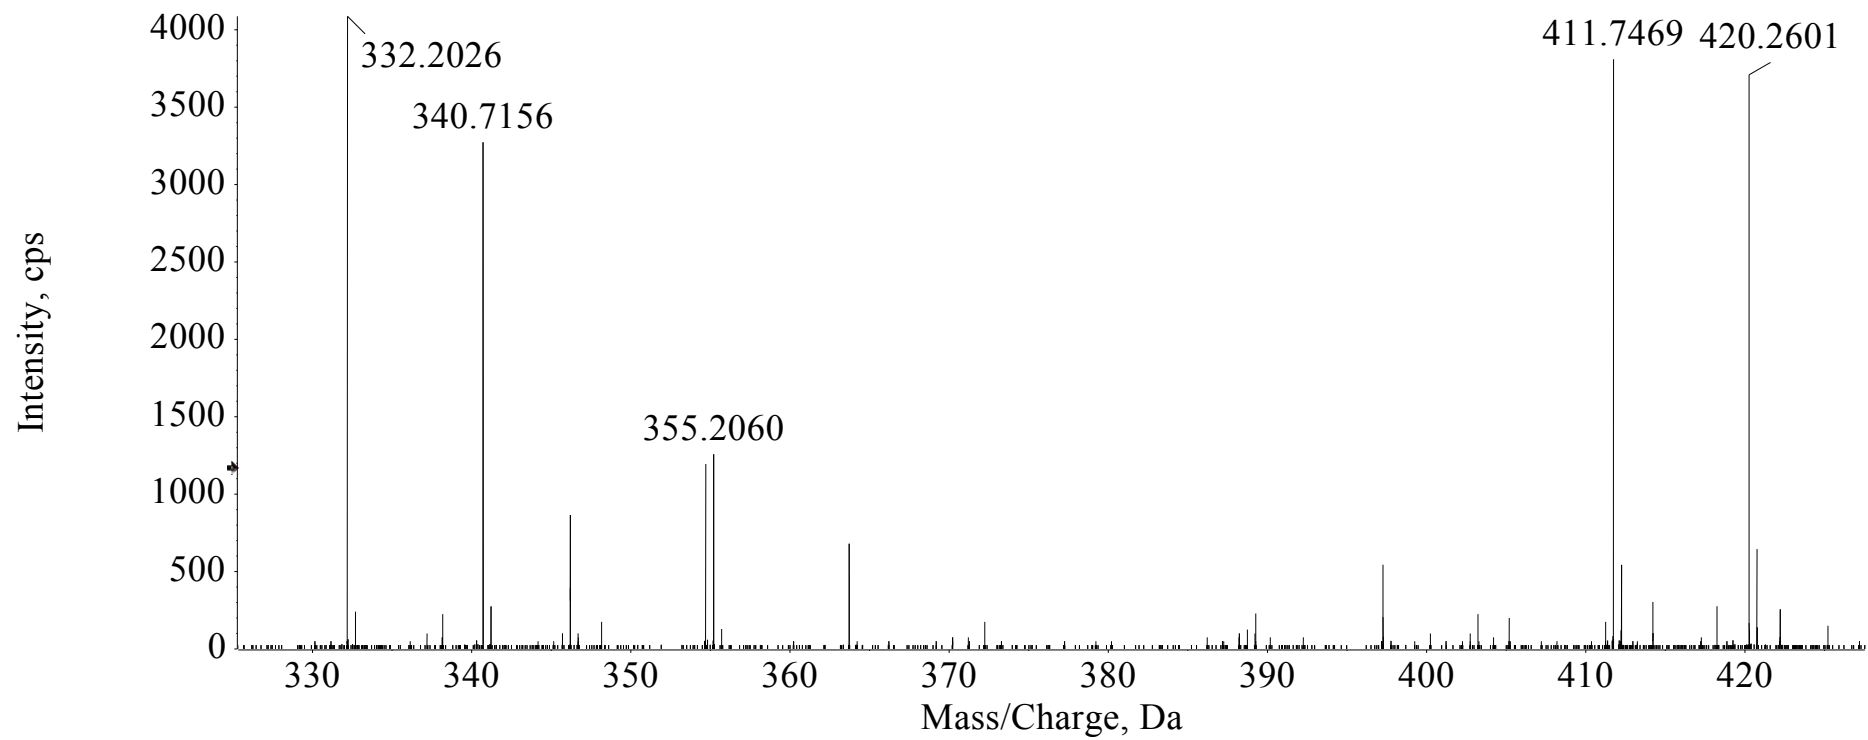

Spectrum from mass20181030.wiff2 (sample 72) - 36, Experiment 5, +IDA TOF MSMS (50 - 1500) from 0.069 min  
Precursor: 705.3 Da, +1, CE: 35.0

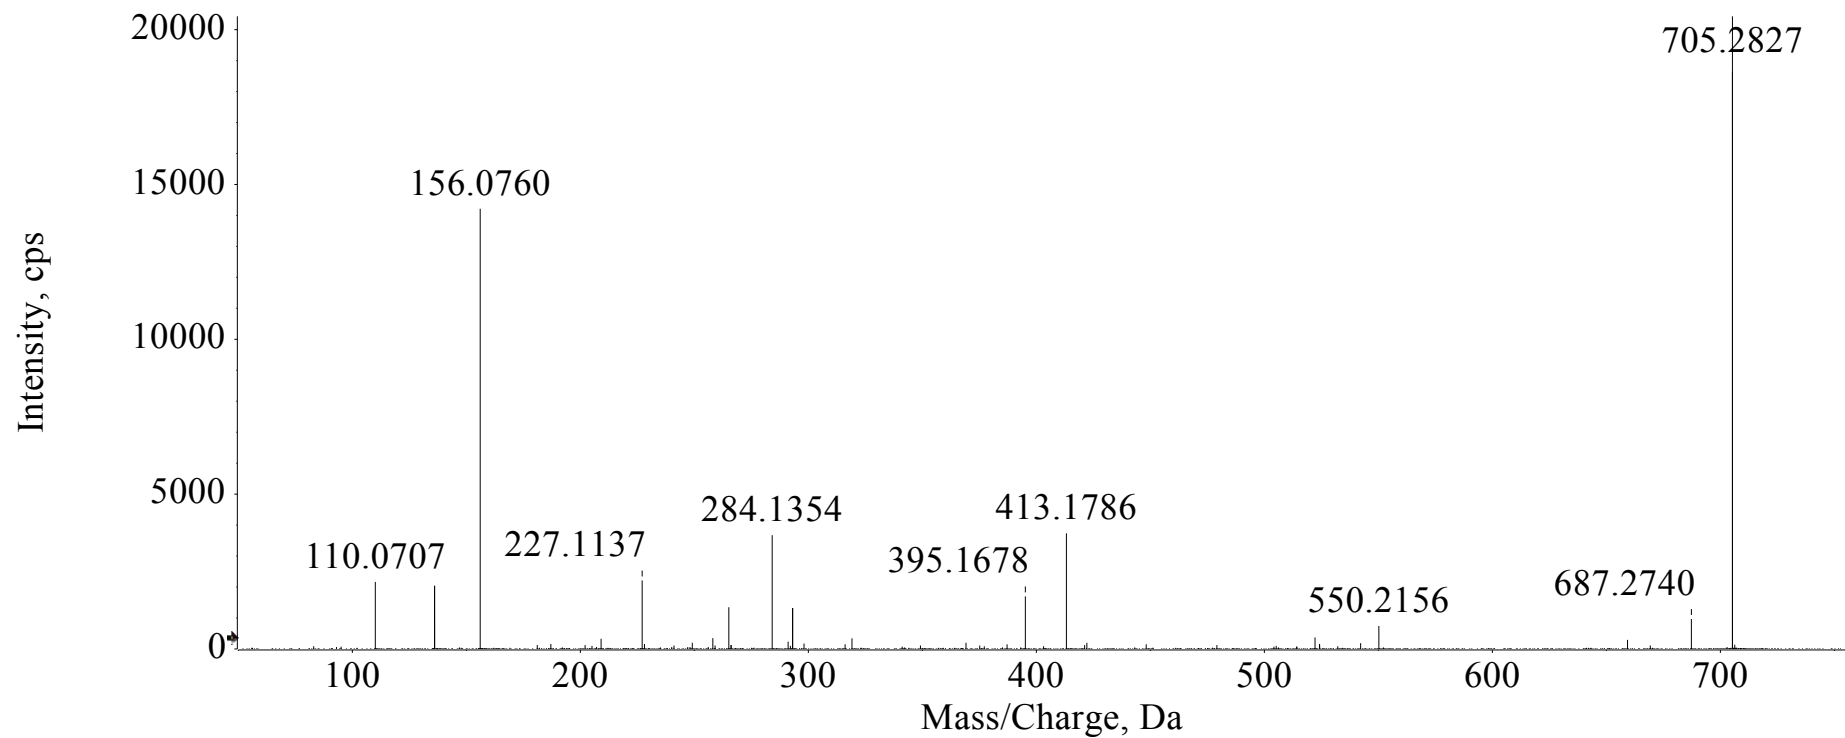



Spectrum from mass20181030.wiff2 (sample 76) - 38, Experiment 9, +IDA TOF MSMS (50 - 1500) from 0.070 min  
Precursor: 728.3 Da, +1, CE: 35.0

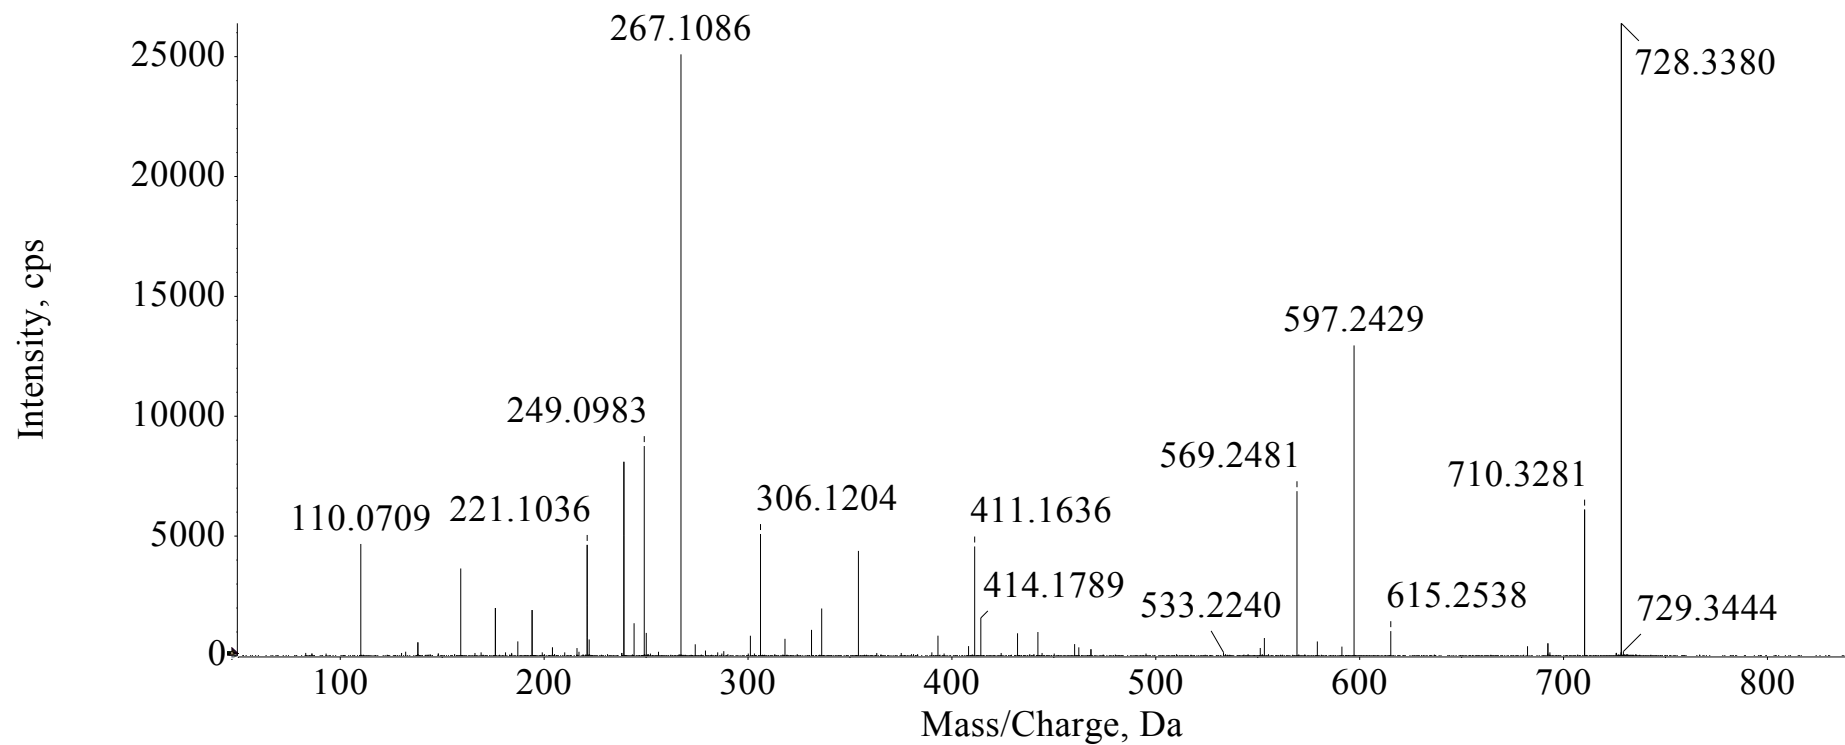

Spectrum from mass20181030.wiff2 (sample 78) - 39, Experiment 6, +IDA TOF MSMS (50 - 1500) from 0.069 min  
Precursor: 791.3 Da, +1, CE: 35.0

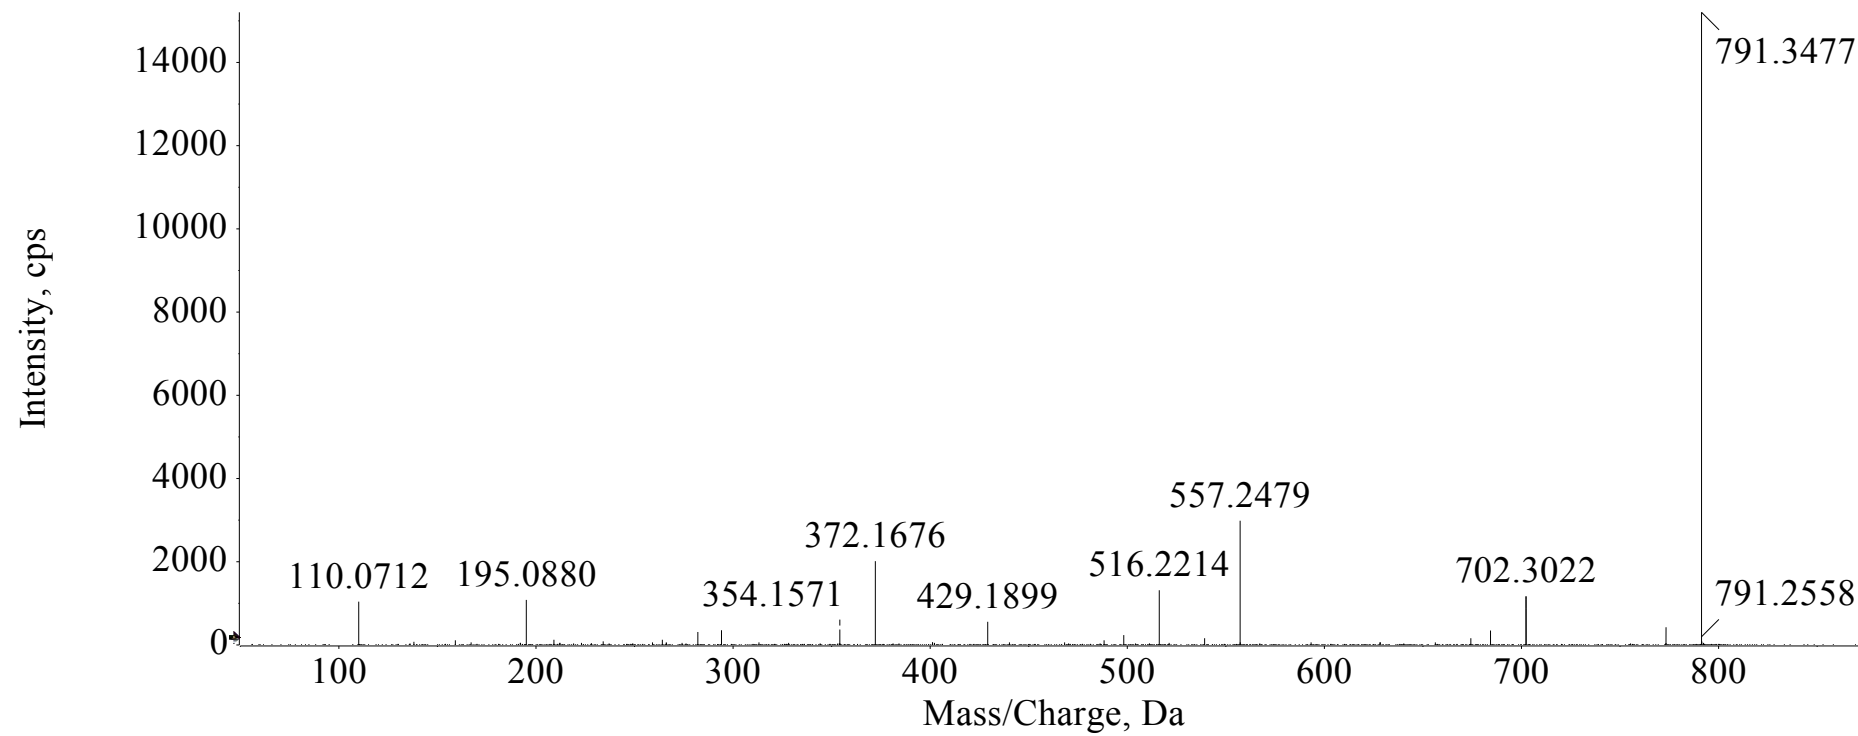

Spectrum from mass20181030.wiff2 (sample 80) - 40, Experiment 11, +IDA TOF MSMS (50 - 1500) from 0.072 min  
Precursor: 761.4 Da, +1, CE: 35.0

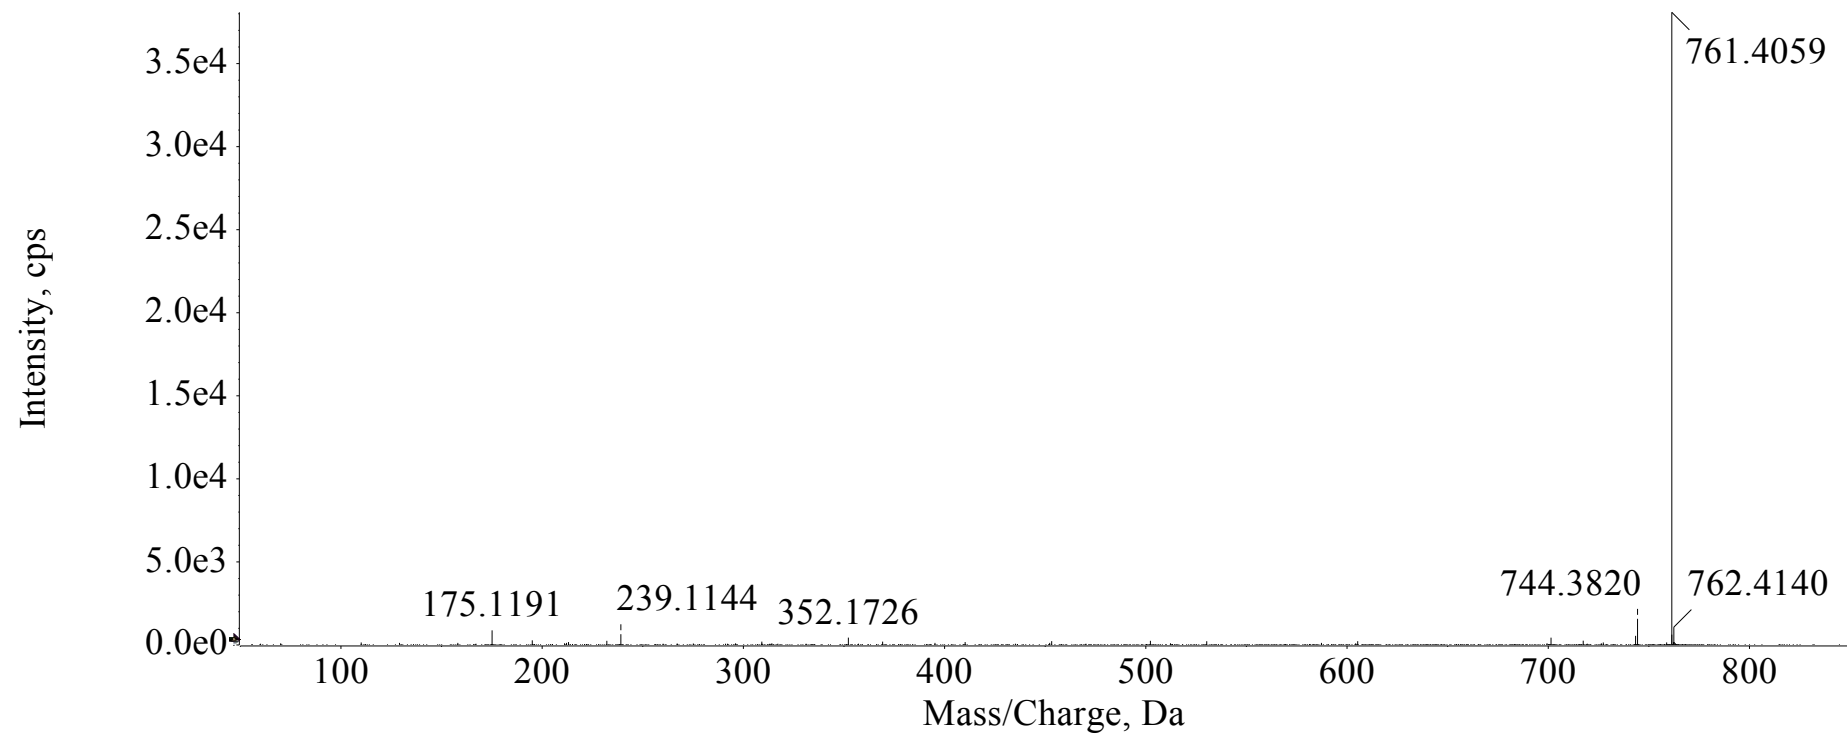

Spectrum from mass20181030.wiff2 (sample 82) - 41, Experiment 5, +IDA TOF MSMS (50 - 1500) from 0.071 min  
Precursor: 675.3 Da, +1, CE: 35.0

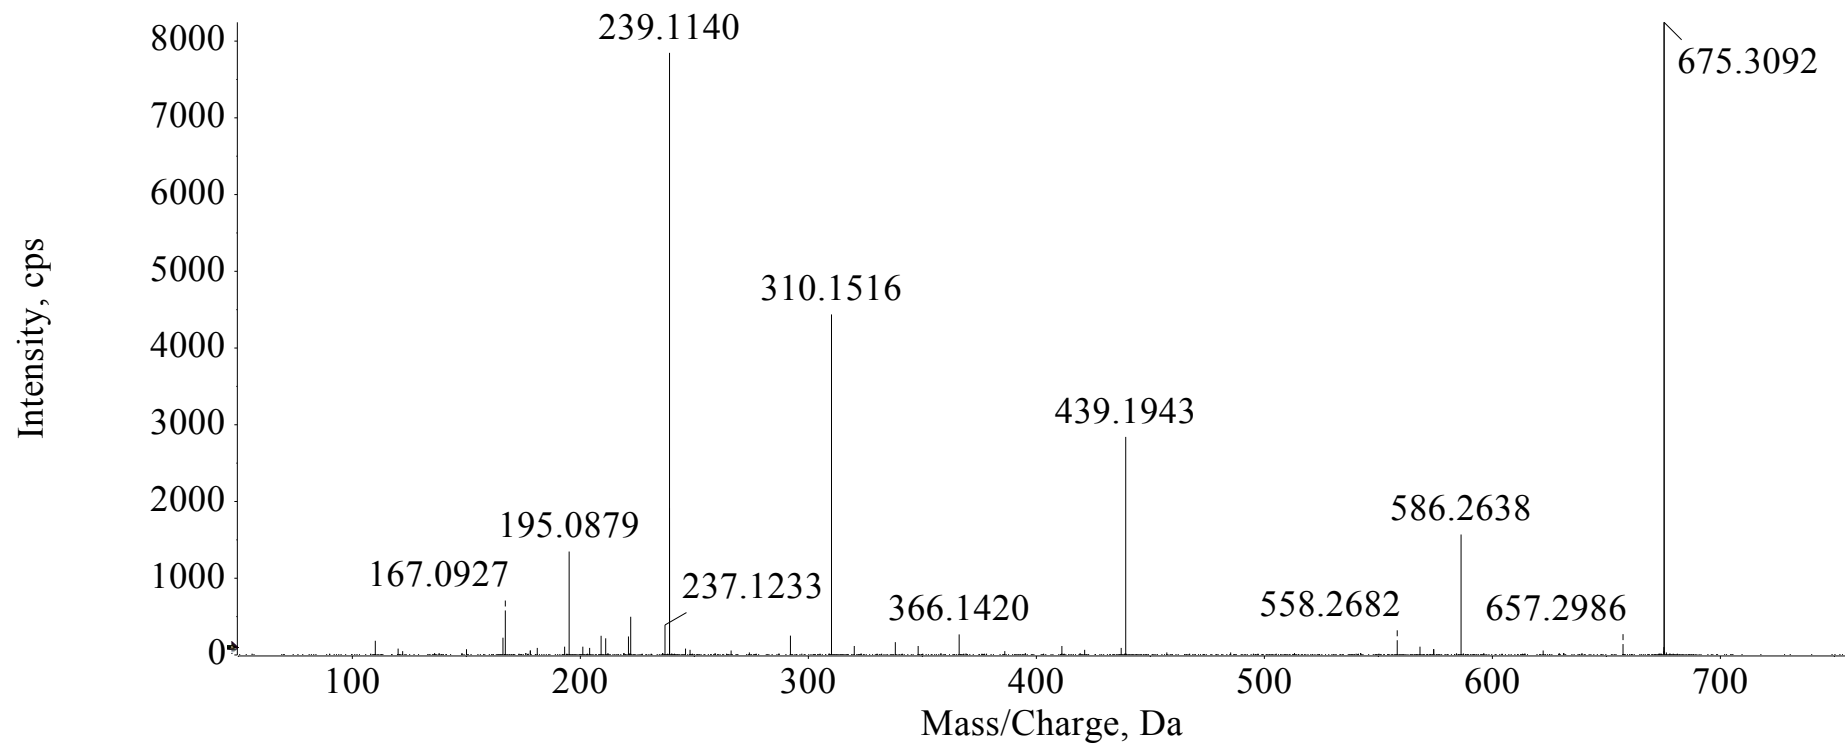

Spectrum from mass20181030.wiff2 (sample 86) - 43, Experiment 11, +IDA TOF MSMS (50 - 1500) from 0.083 min  
Precursor: 807.4 Da, +1, CE: 35.0

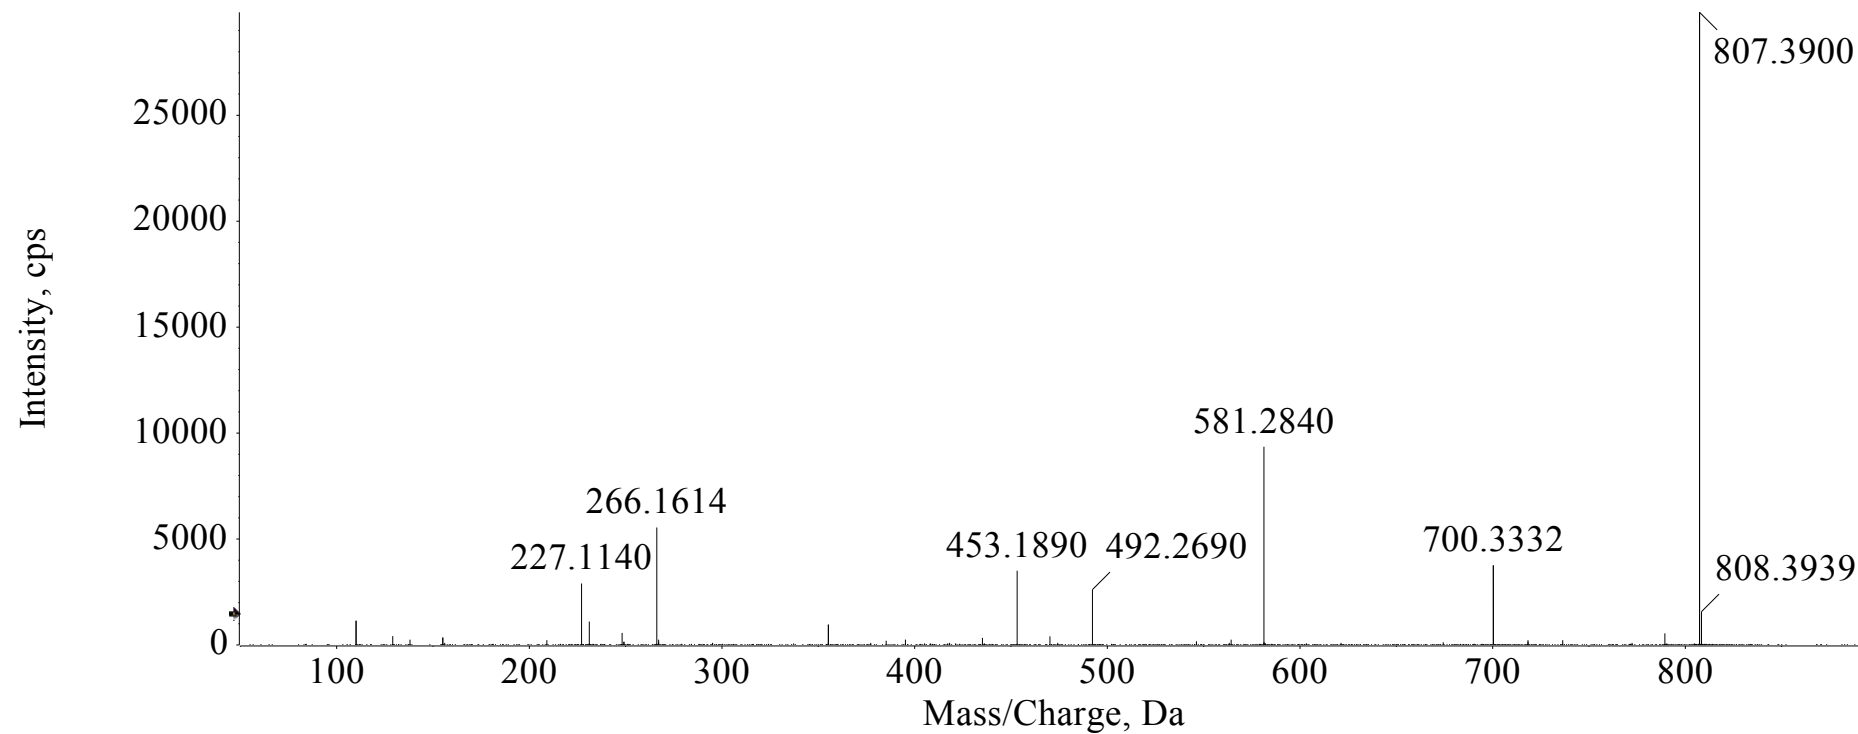

Spectrum from mass20181030.wiff2 (sample 88) - 44, Experiment 8, +IDA TOF MSMS (50 - 1500) from 0.080 min  
Precursor: 602.3 Da, +1, CE: 35.0

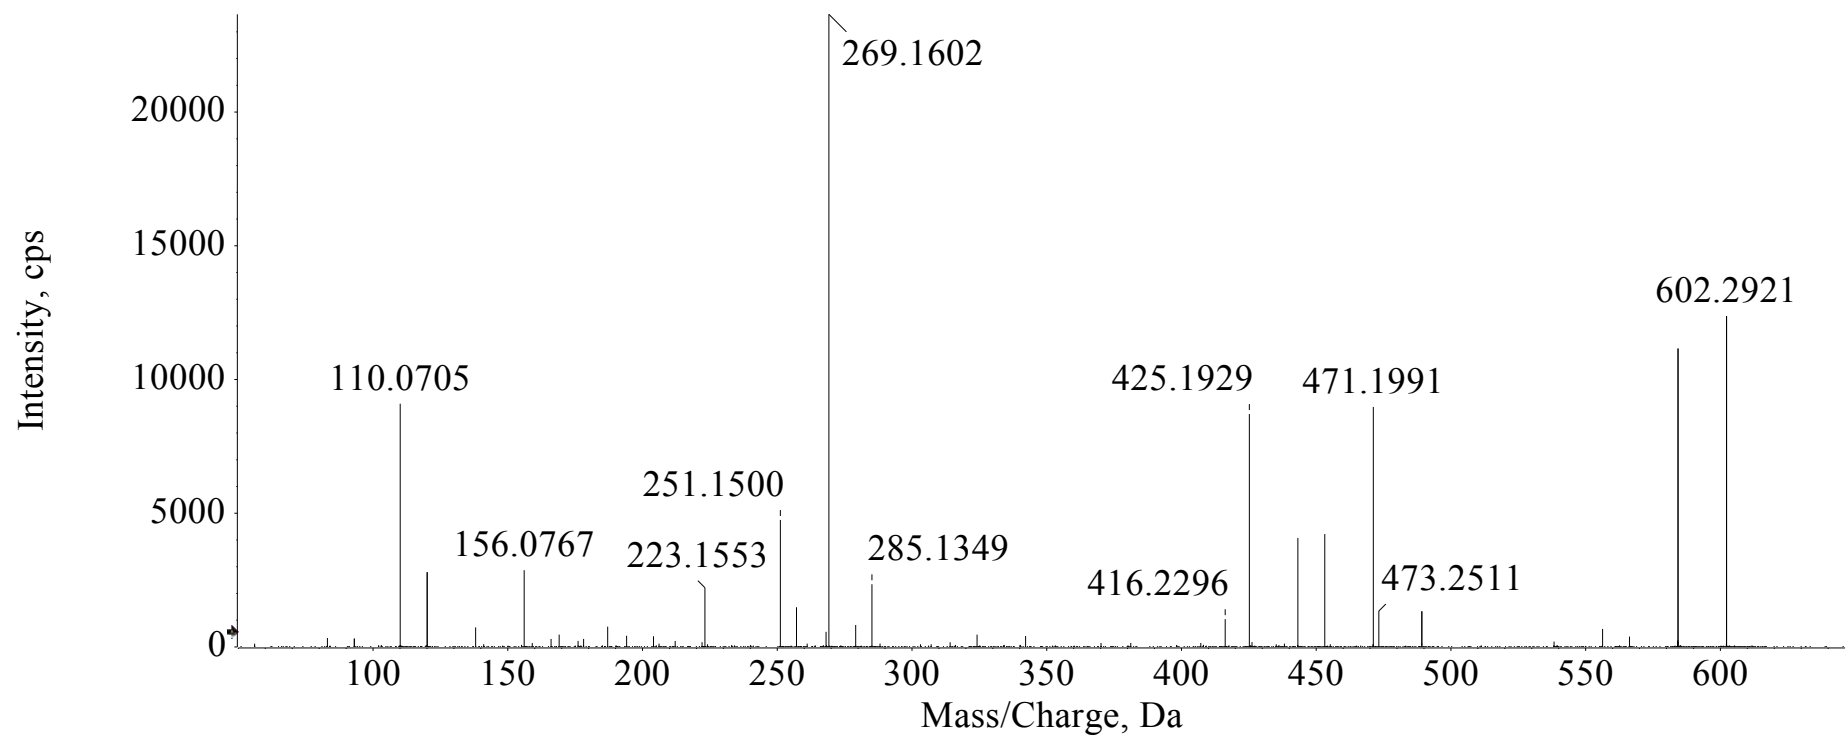

Spectrum from mass20181030.wiff2 (sample 90) - 45, Experiment 9, +IDA TOF MSMS (50 - 1500) from 0.070 min  
Precursor: 791.3 Da, +1, CE: 35.0

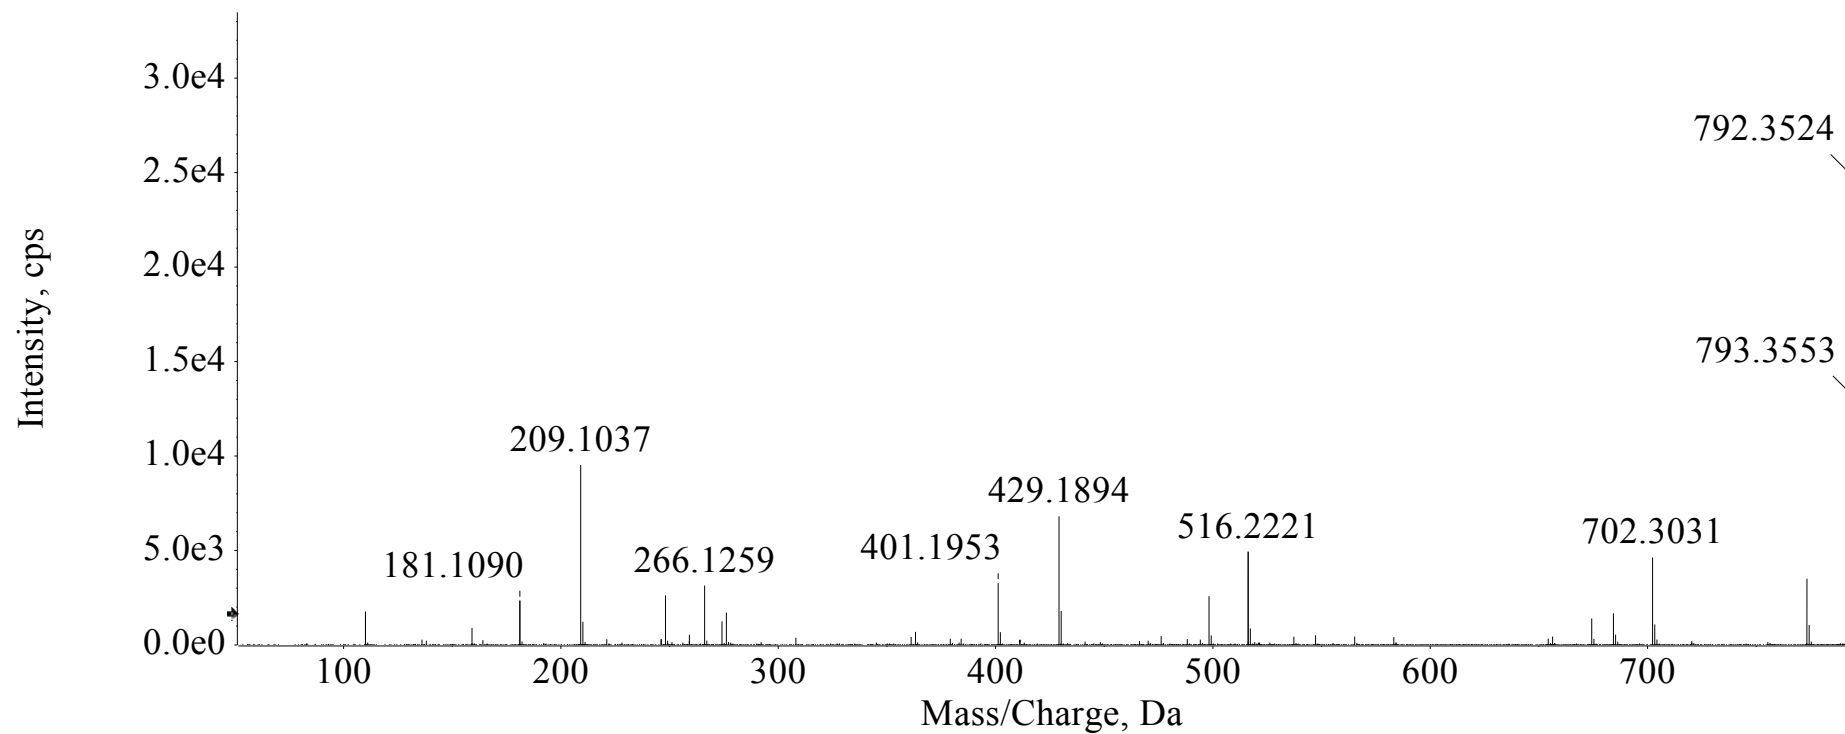

Spectrum from mass20181030.wiff2 (sample 92) - 46, Experiment 8, +IDA TOF MSMS (50 - 1500) from 0.223 min  
Precursor: 684.2 Da, +1, CE: 35.0

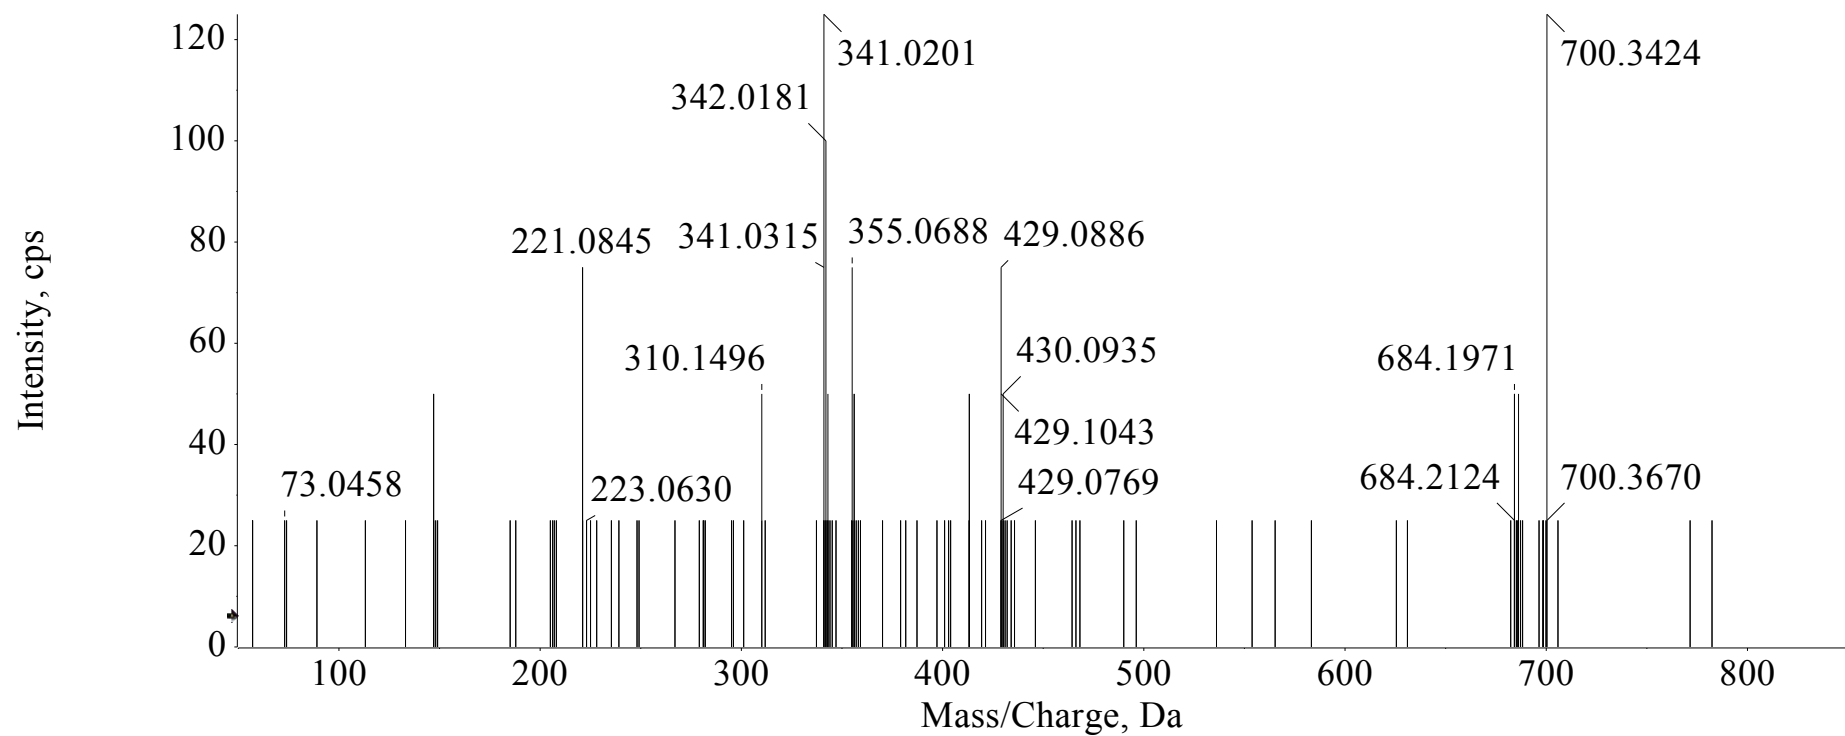



Spectrum from mass20181030.wiff2 (sample 94) - 47, Experiment 8, +IDA TOF MSMS (50 - 1500) from 0.070 min  
Precursor: 781.3 Da, +1, CE: 35.0

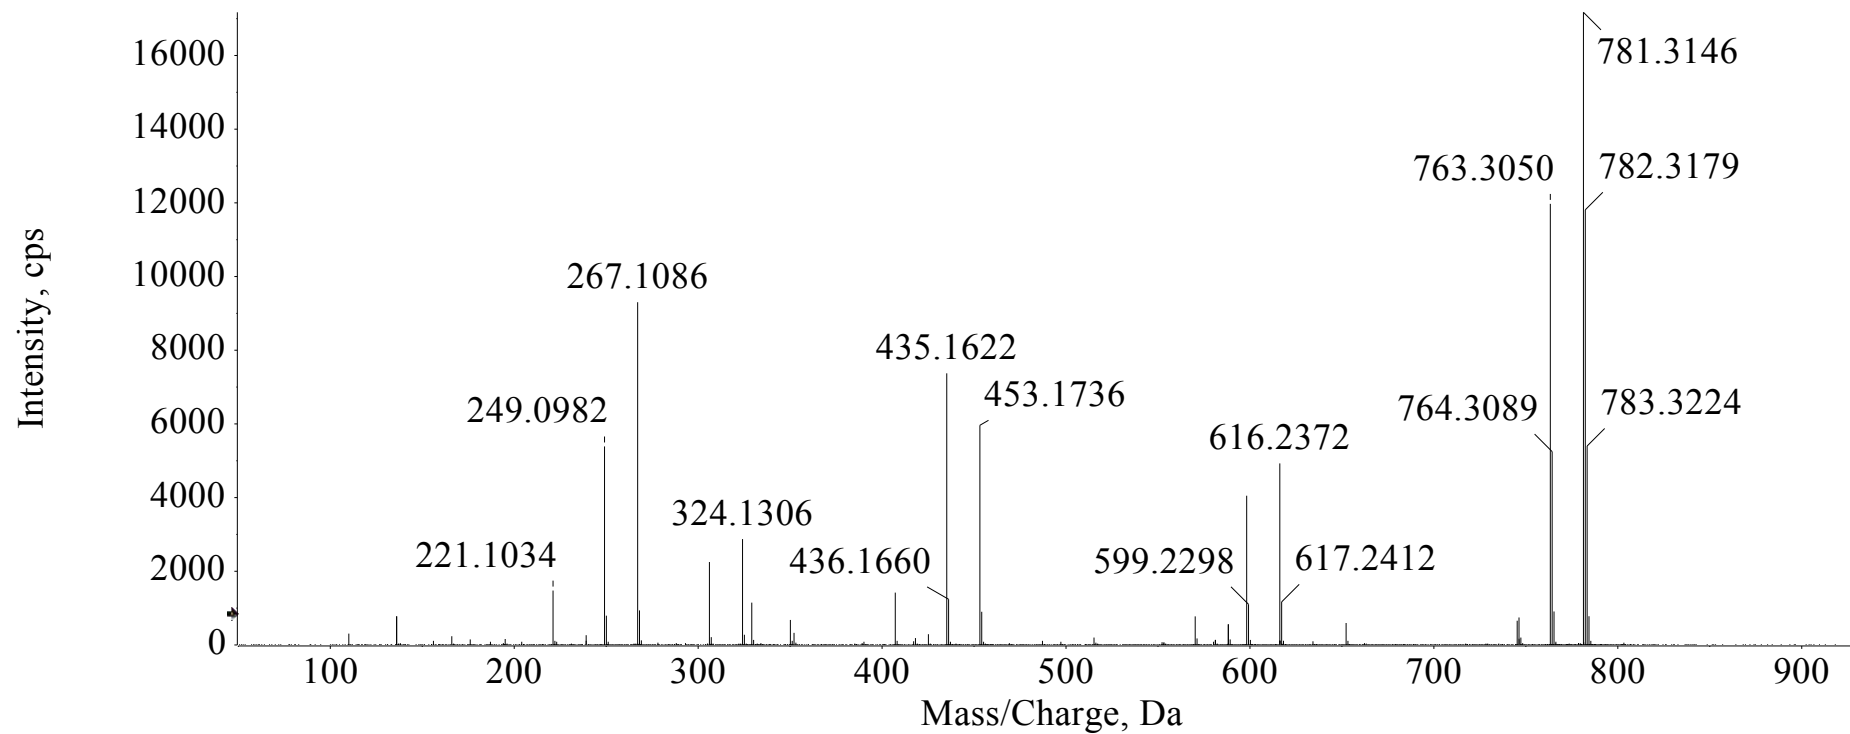

Spectrum from mass20181030.wiff2 (sample 98) - 49, Experiment 7, +IDA TOF MSMS (50 - 1500) from 0.069 min  
Precursor: 730.4 Da, +1, CE: 35.0

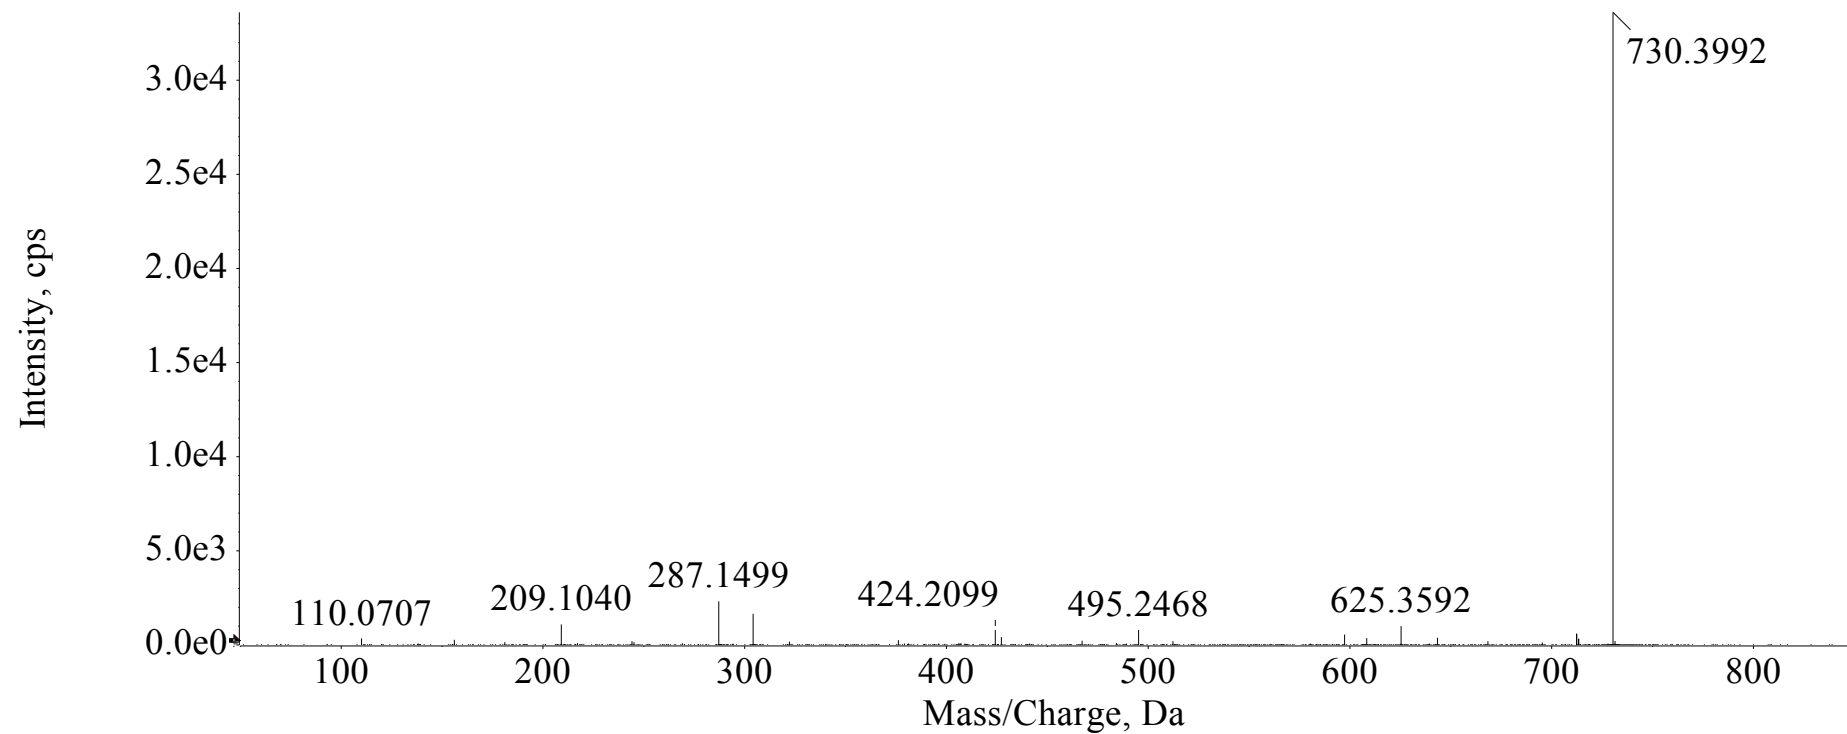

Spectrum from mass20181030.wiff2 (sample 102) - 51, Experiment 11, +IDA TOF MSMS (50 - 1500) from 0.072 min

Precursor: 780.4 Da, +1, CE: 35.0

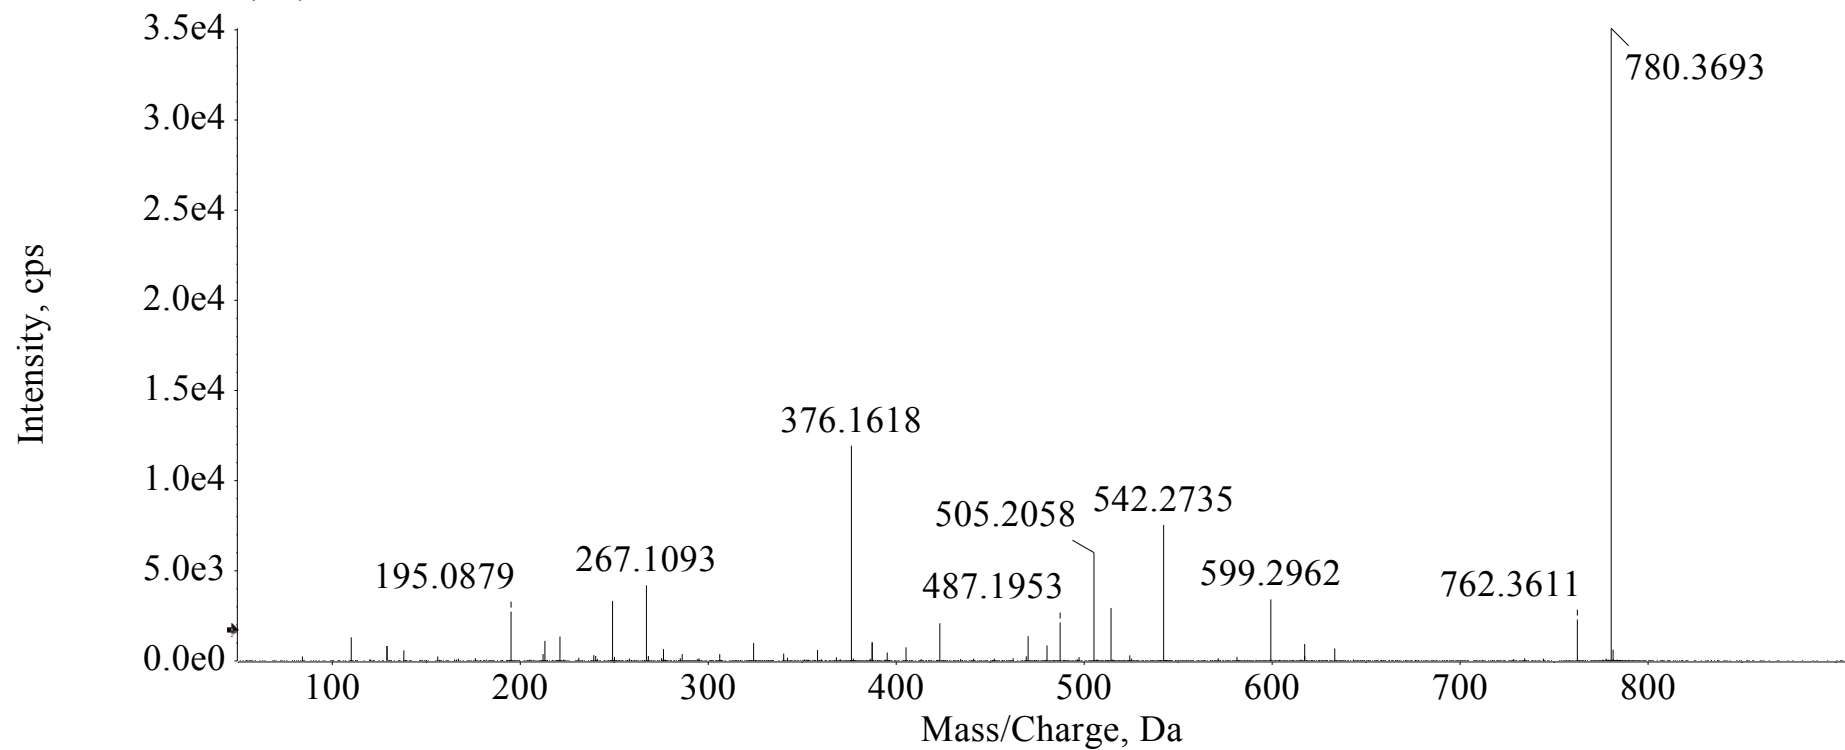

Spectrum from mass20181030.wiff2 (sample 104) - 52, Experiment 4, +IDA TOF MSMS (50 - 1500) from 0.079 min  
Precursor: 475.2 Da, +2, CE: 35.0

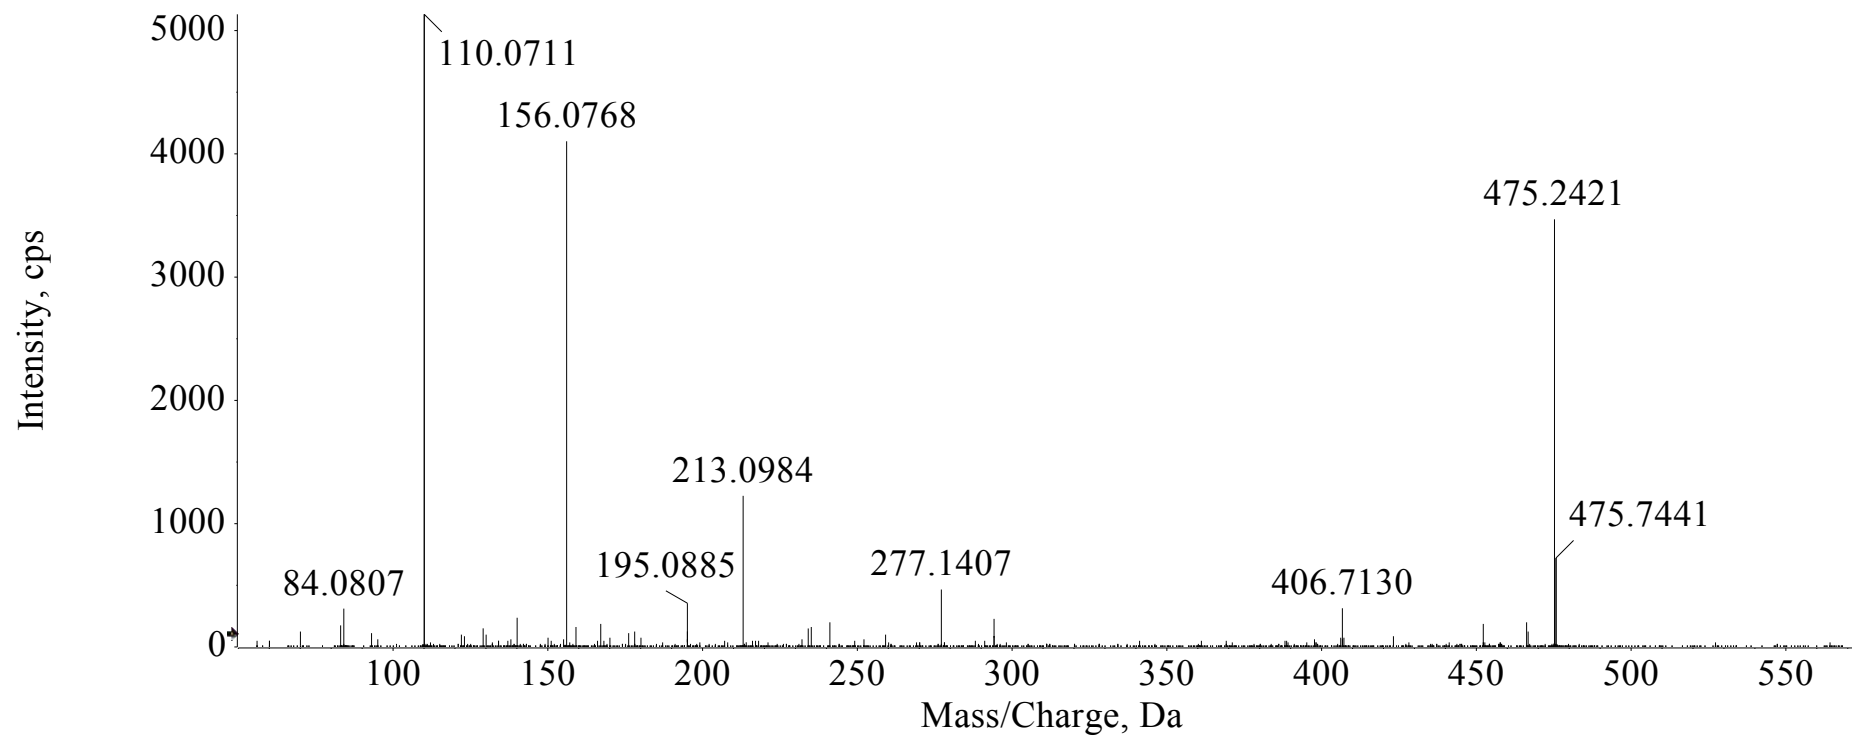

Spectrum from mass20181030.wiff2 (sample 106) - 53, Experiment 7, +IDA TOF MSMS (50 - 1500) from 0.070 min  
Precursor: 605.3 Da, +1, CE: 35.0

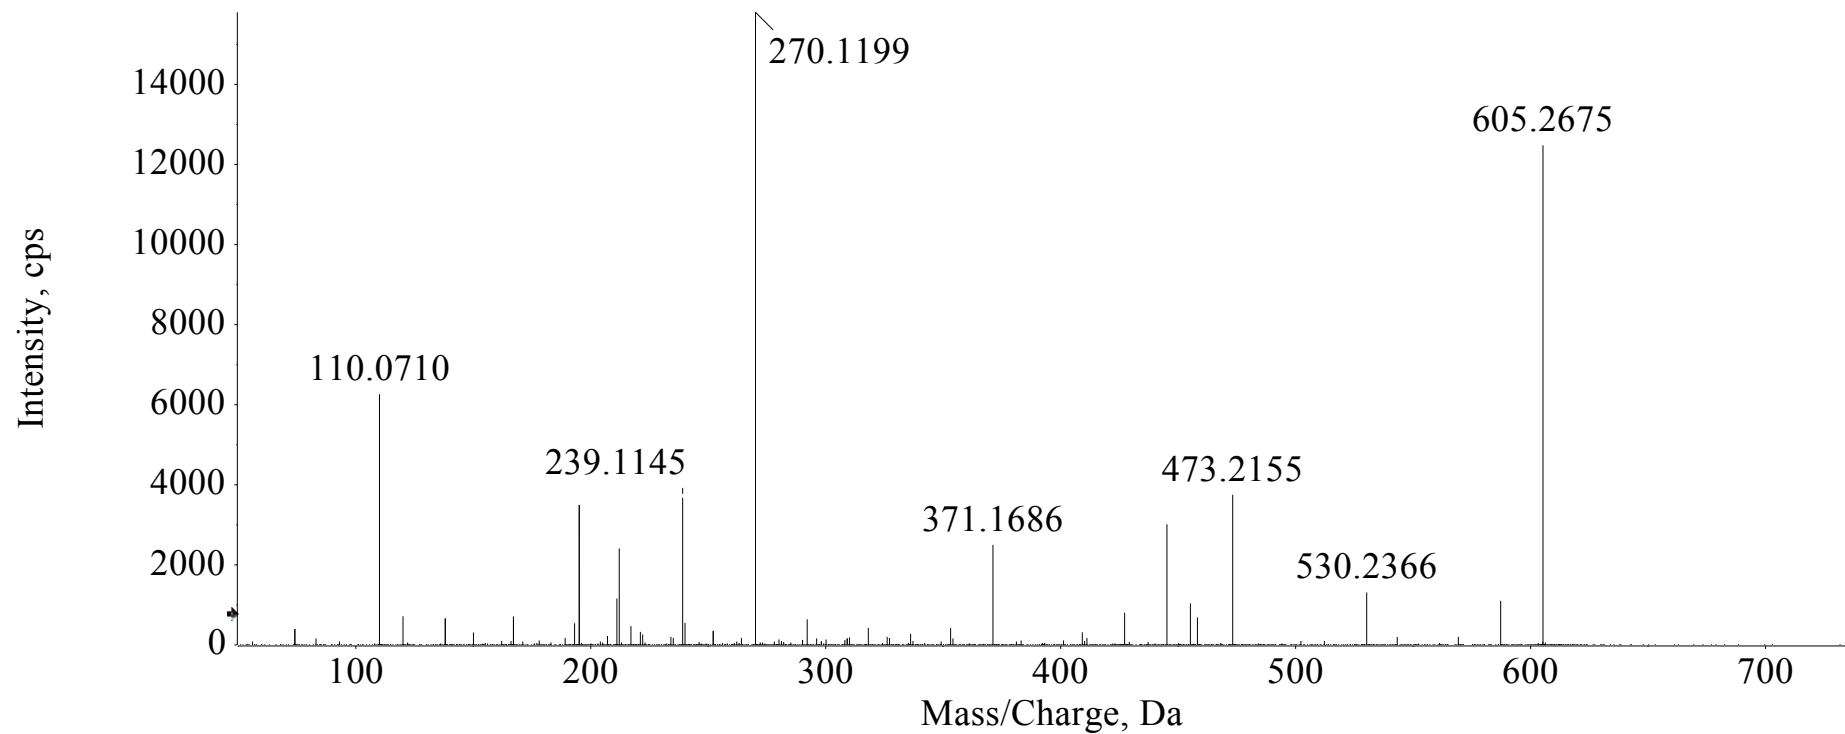

Spectrum from mass20181030.wiff2 (sample 106) - 53, Experiment 7, +IDA TOF MSMS (50 - 1500) from 0.070 min  
Precursor: 605.3 Da, +1, CE: 35.0

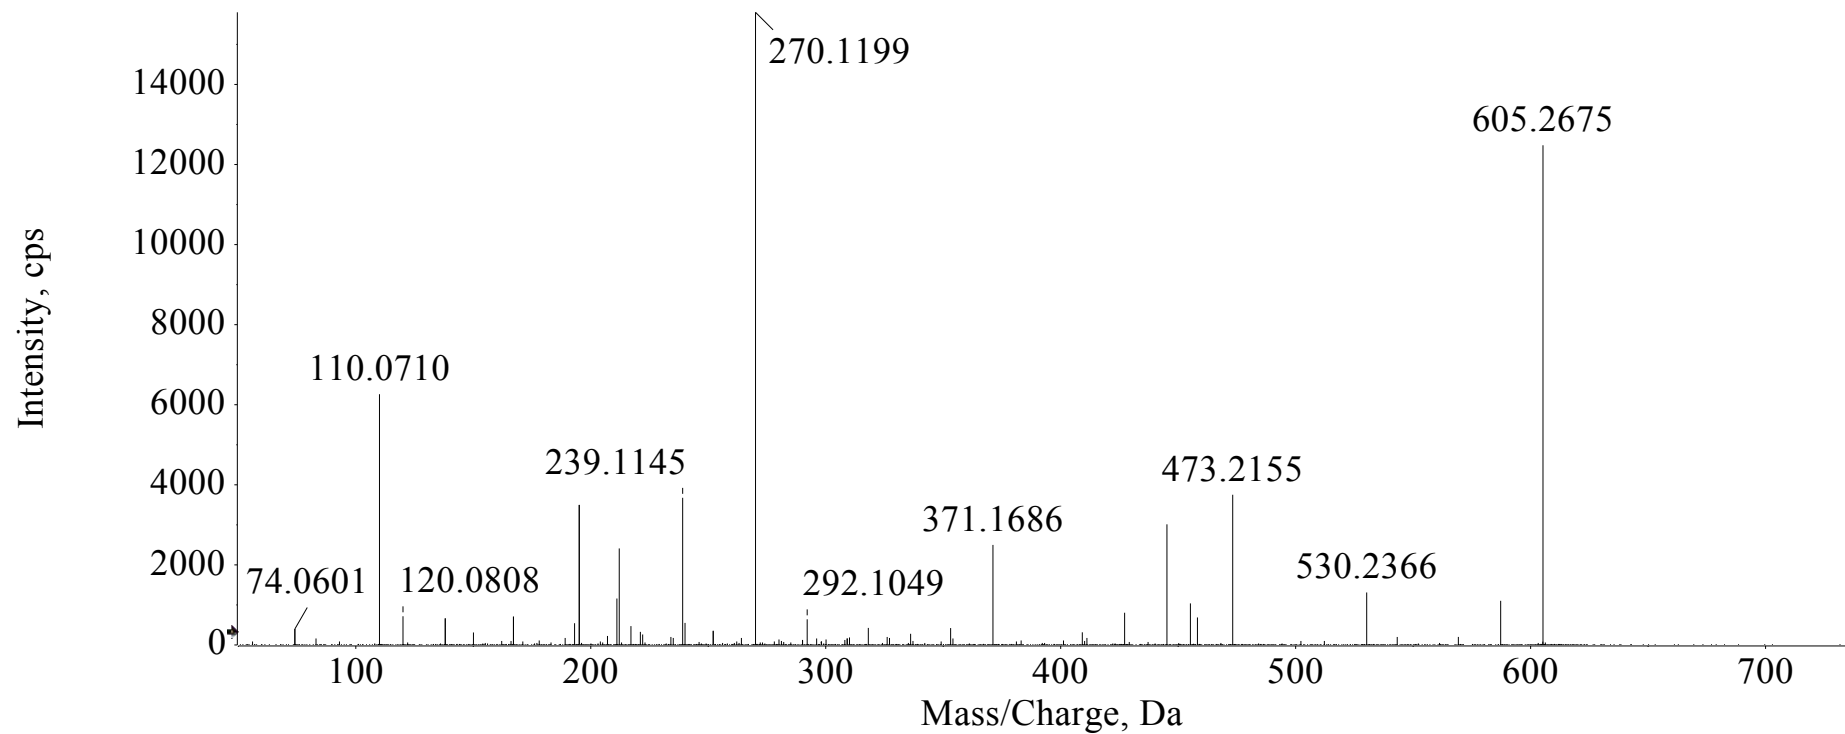

Spectrum from mass20181030.wiff2 (sample 110) - 55, Experiment 6, +IDA TOF MSMS (50 - 1500) from 0.069 min  
Precursor: 728.3 Da, +1, CE: 35.0

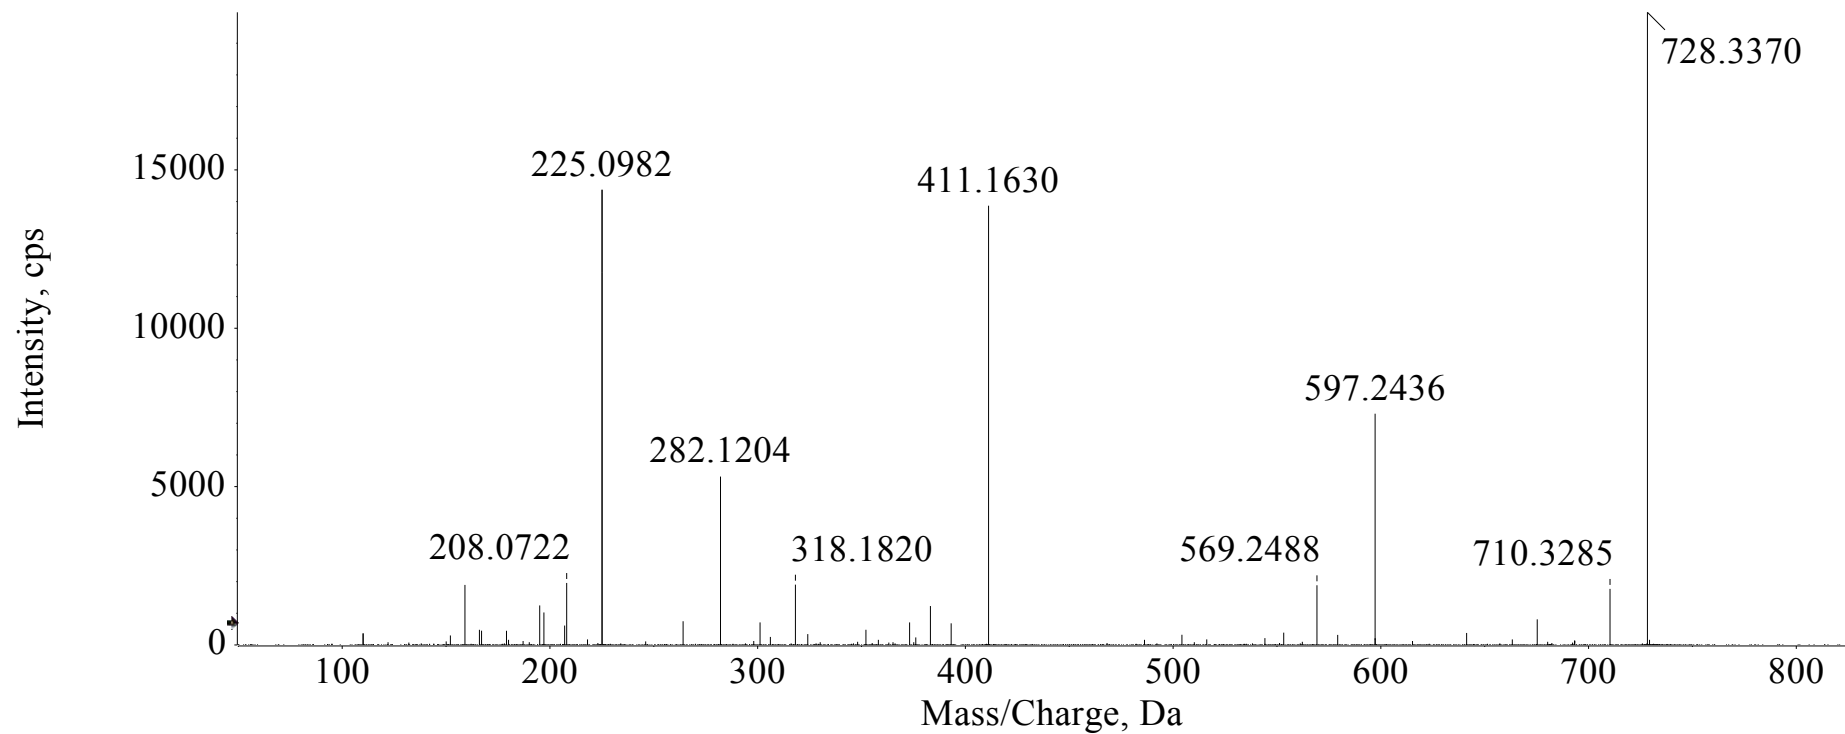

Spectrum from mass20181030.wiff2 (sample 112) - 56, Experiment 11, +IDA TOF MSMS (50 - 1500) from 0.072 min  
Precursor: 740.4 Da, +1, CE: 35.0

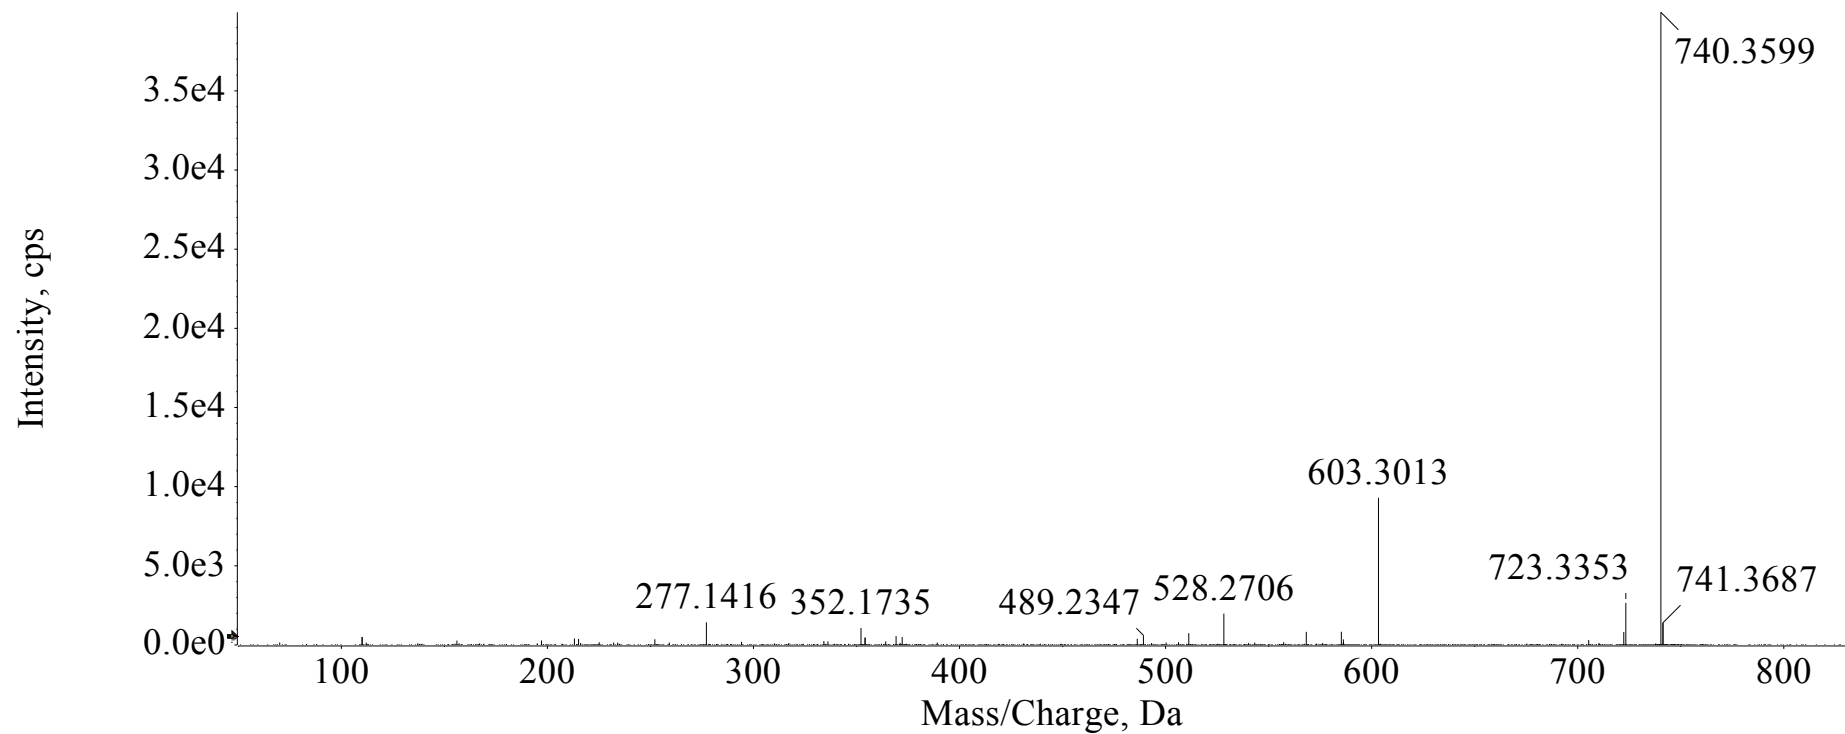



Spectrum from mass20181030.wiff2 (sample 114) - 57, Experiment 4, +IDA TOF MSMS (50 - 1500) from 0.067 min  
Precursor: 342.1 Da, +1, CE: 35.0

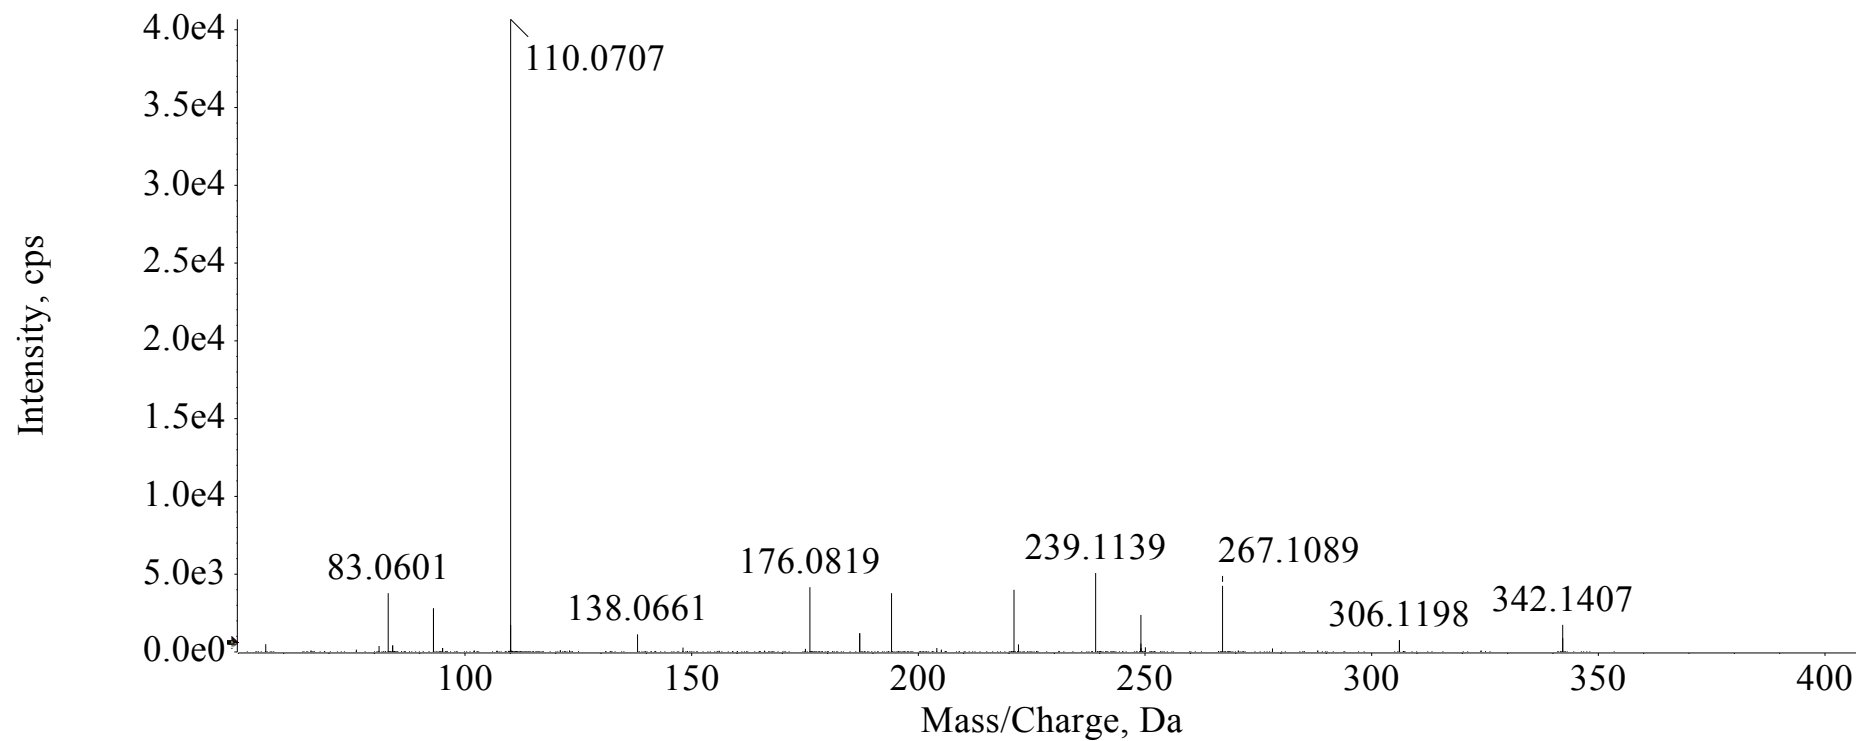

Spectrum from mass20181030.wiff2 (sample 116) - 58, Experiment 6, +IDA TOF MSMS (50 - 1500) from 0.068 min  
Precursor: 284.1 Da, +1, CE: 35.0

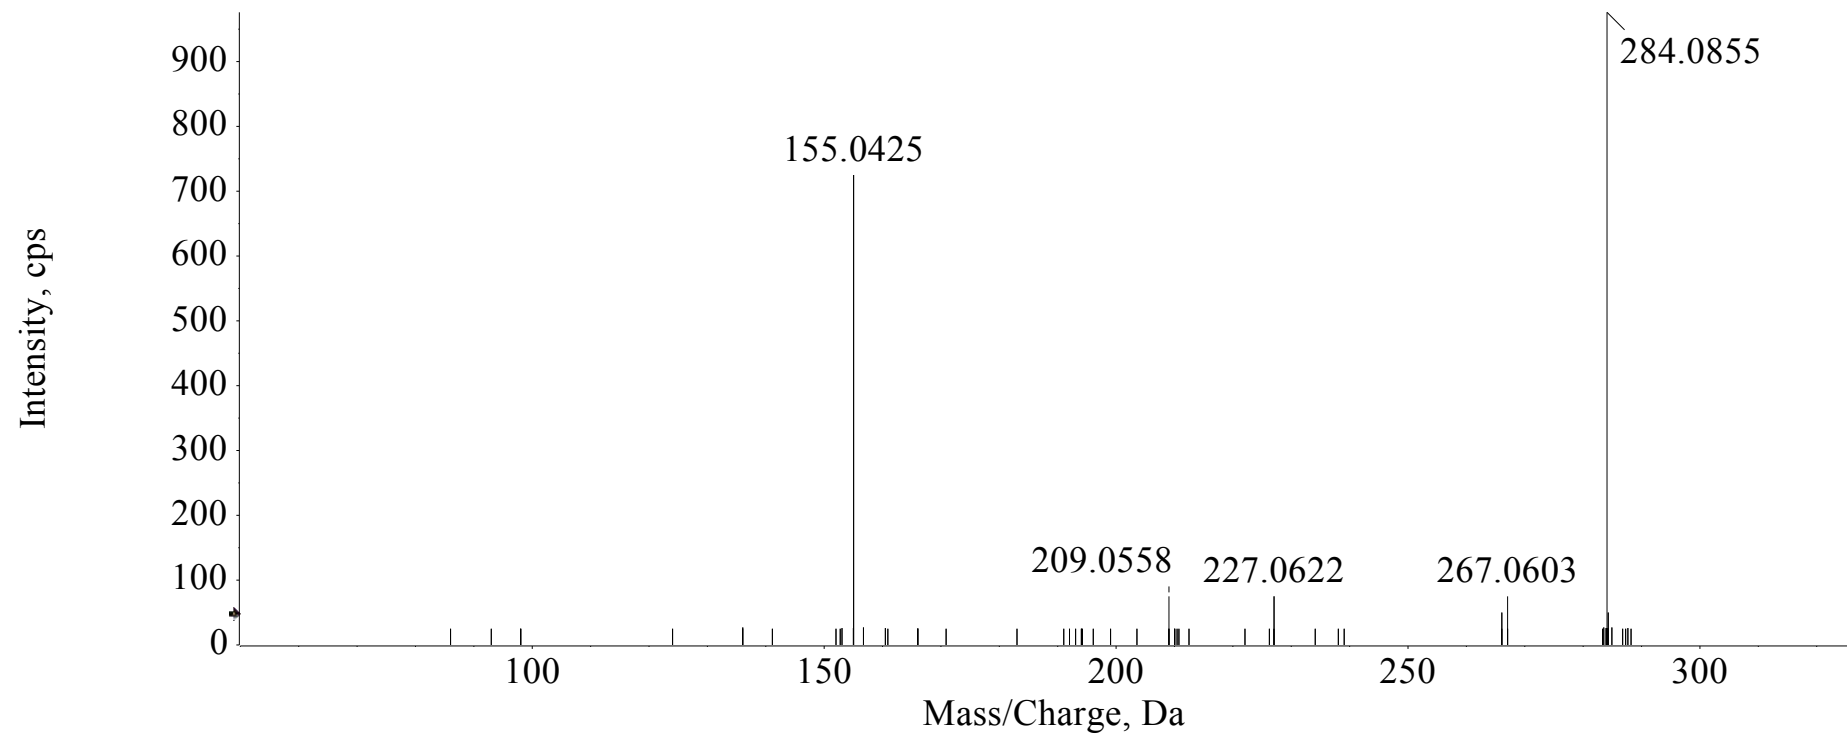

Spectrum from mass20181030.wiff2 (sample 118) - 59, Experiment 9, +IDA TOF MSMS (50 - 1500) from 0.070 min  
Precursor: 576.2 Da, +1, CE: 35.0

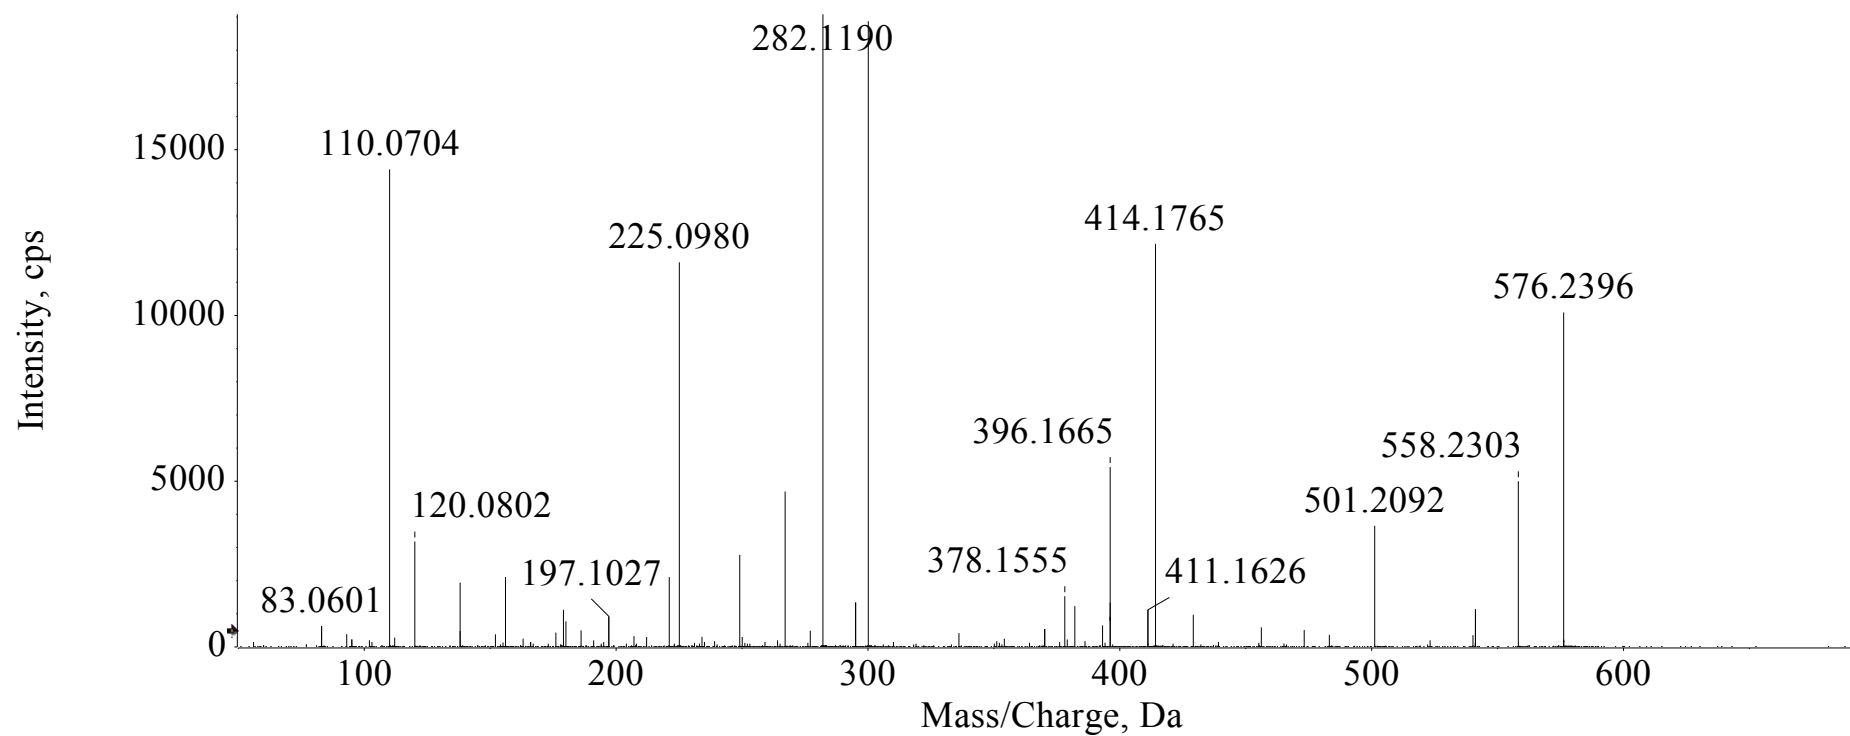

Spectrum from mass20181030.wiff2 (sample 122) - 61, Experiment 9, +IDA TOF MSMS (50 - 1500) from 0.070 min  
Precursor: 739.4 Da, +1, CE: 35.0

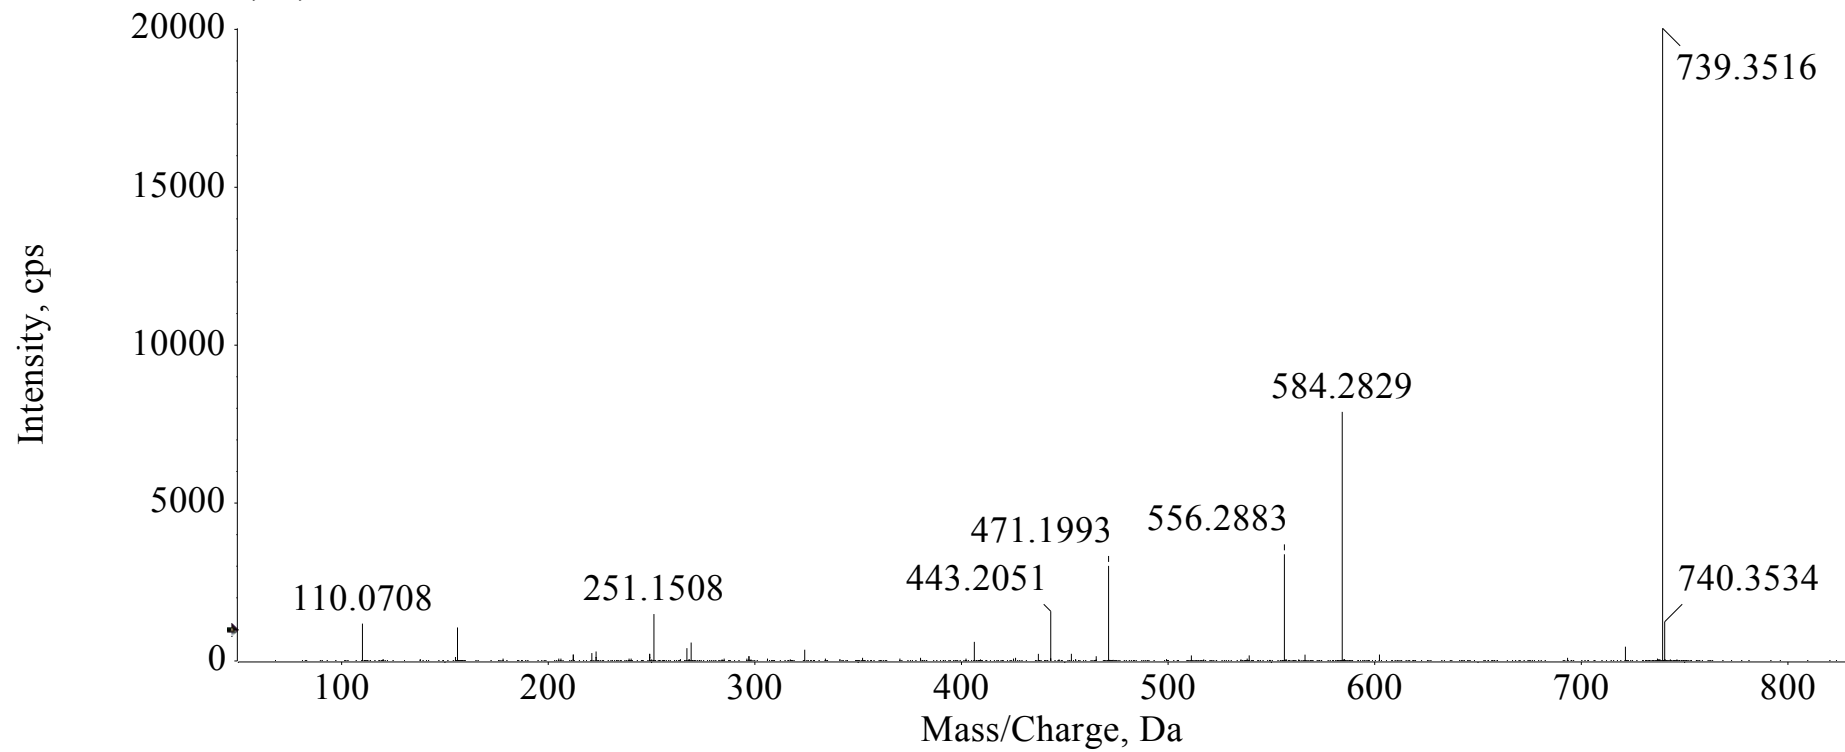

Spectrum from mass20181030.wiff2 (sample 124) - 62, Experiment 5, +IDA TOF MSMS (50 - 1500) from 0.069 min  
Precursor: 261.2 Da, +1, CE: 35.0

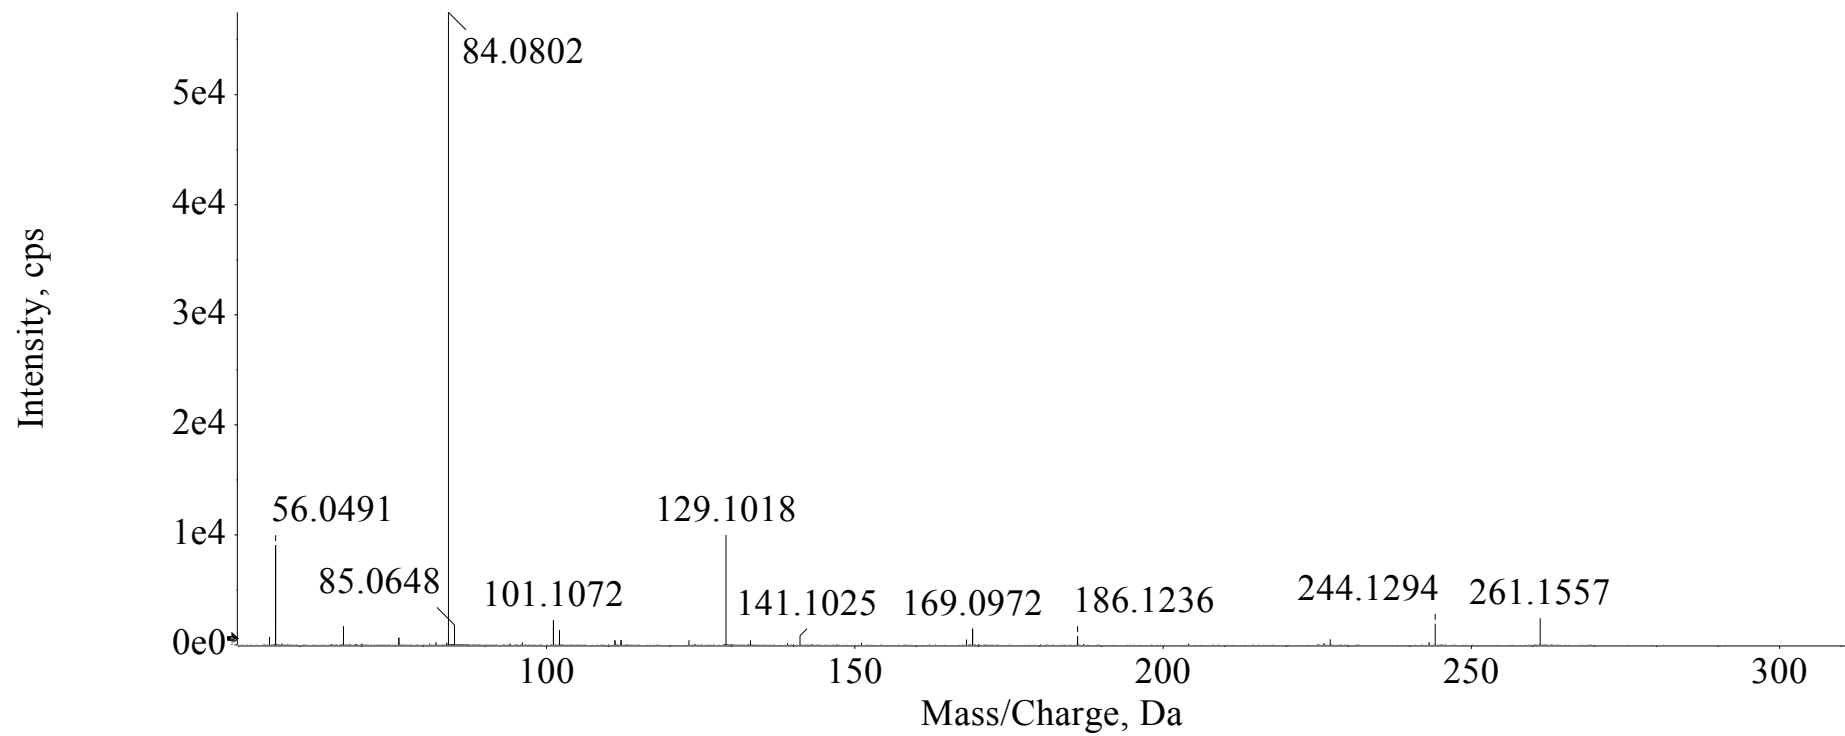

Spectrum from mass20181030.wiff2 (sample 128) - 64, Experiment 5, +IDA TOF MSMS (50 - 1500) from 0.067 min  
Precursor: 318.2 Da, +1, CE: 35.0

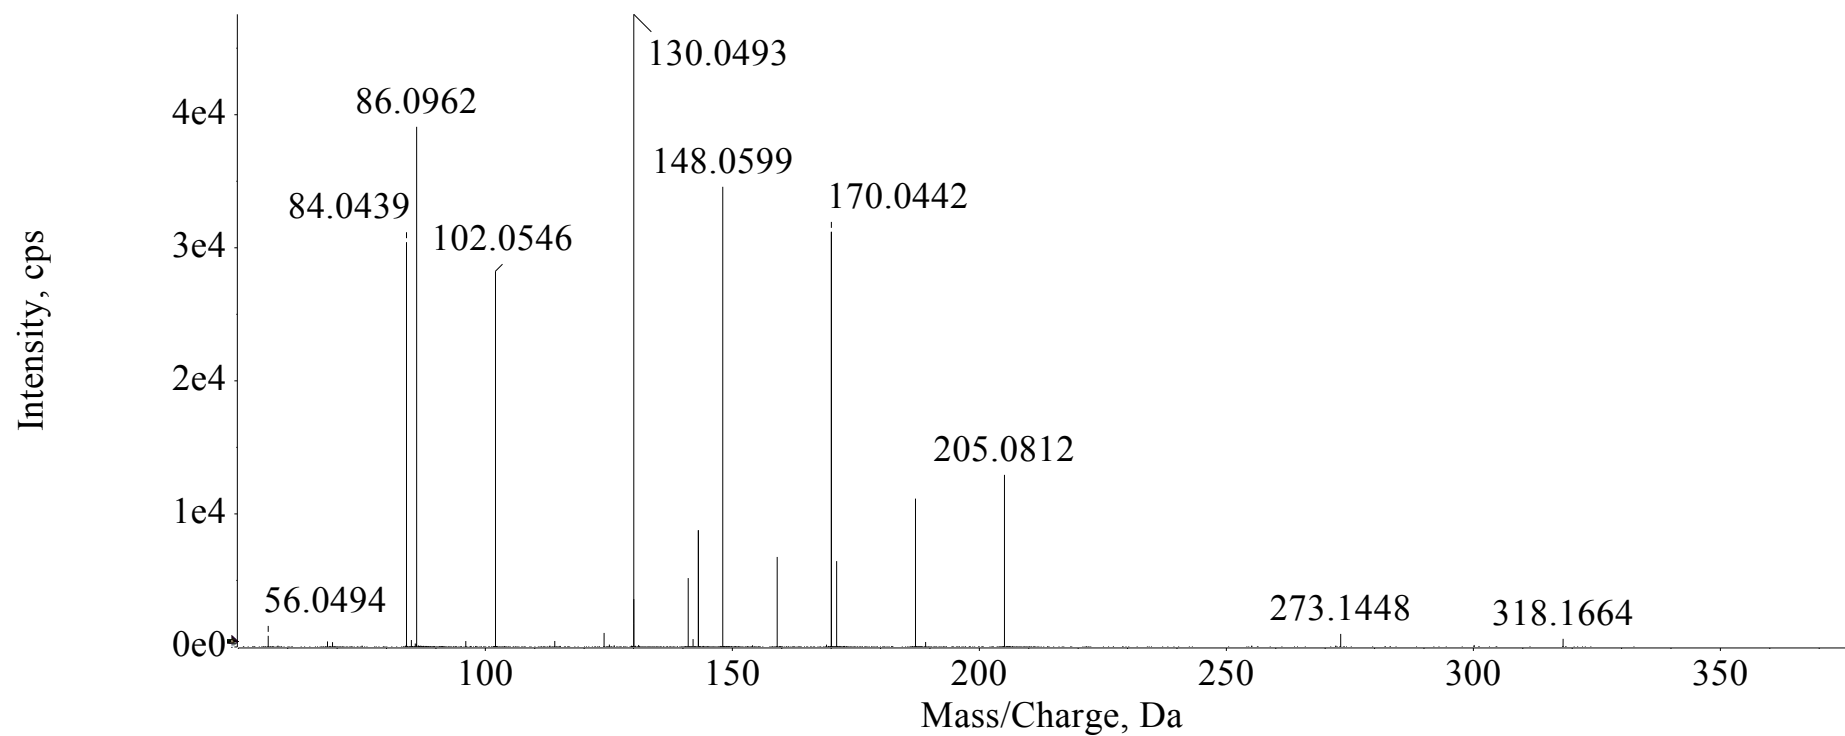

Spectrum from mass20181030.wiff2 (sample 130) - 65, Experiment 7, +IDA TOF MSMS (50 - 1500) from 0.068 min  
Precursor: 204.1 Da, +1, CE: 35.0

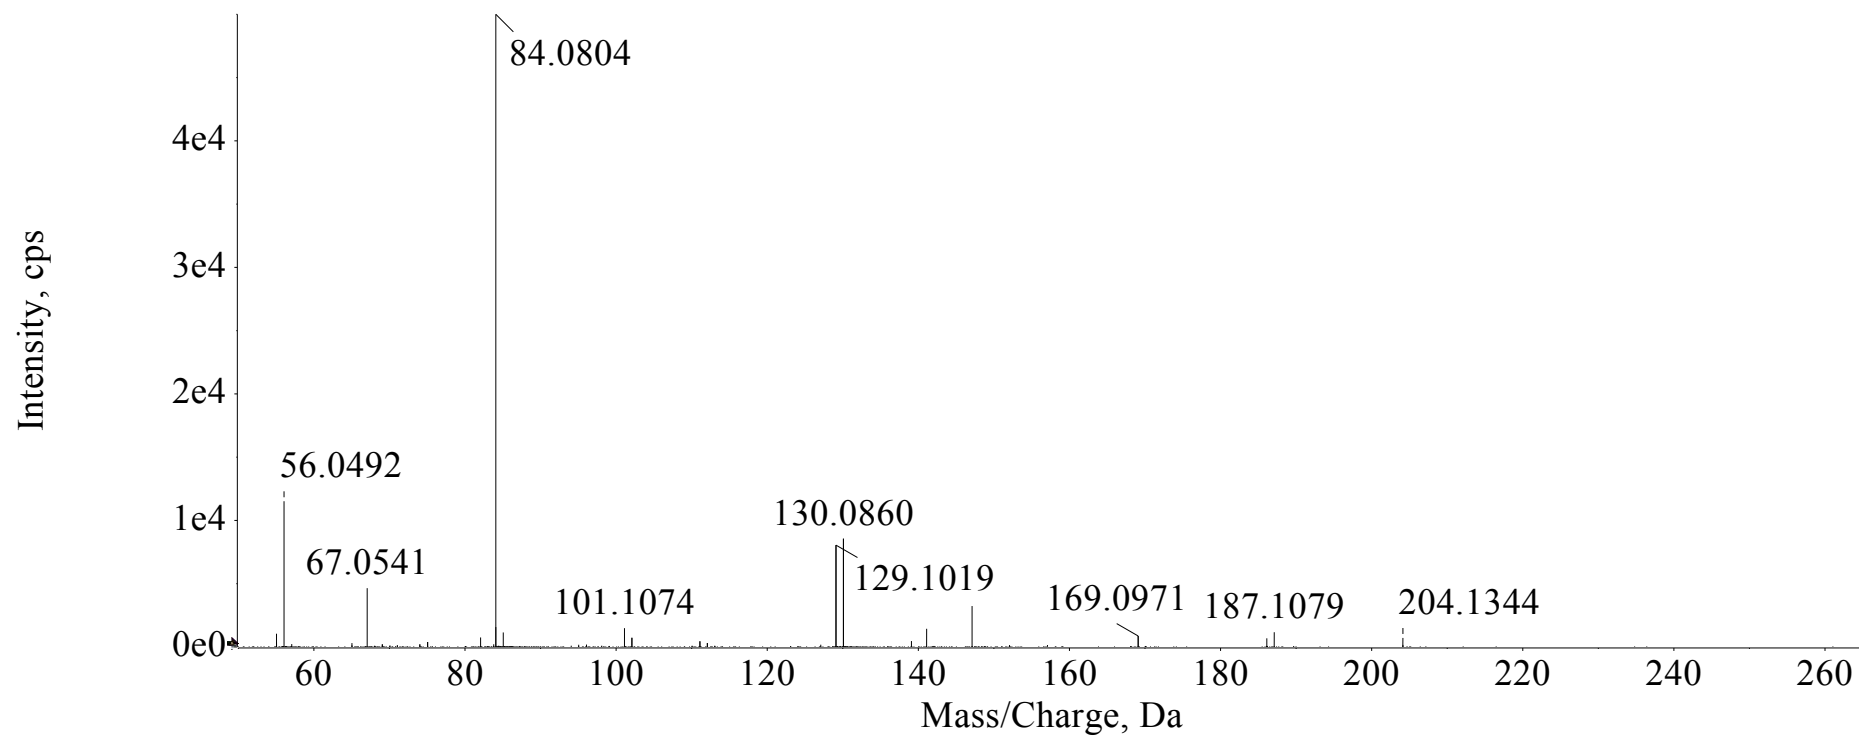

Spectrum from mass20181030.wiff2 (sample 134) - 67, Experiment 4, +IDA TOF MSMS (50 - 1500) from 0.066 min  
Precursor: 372.7 Da, +2, CE: 35.0

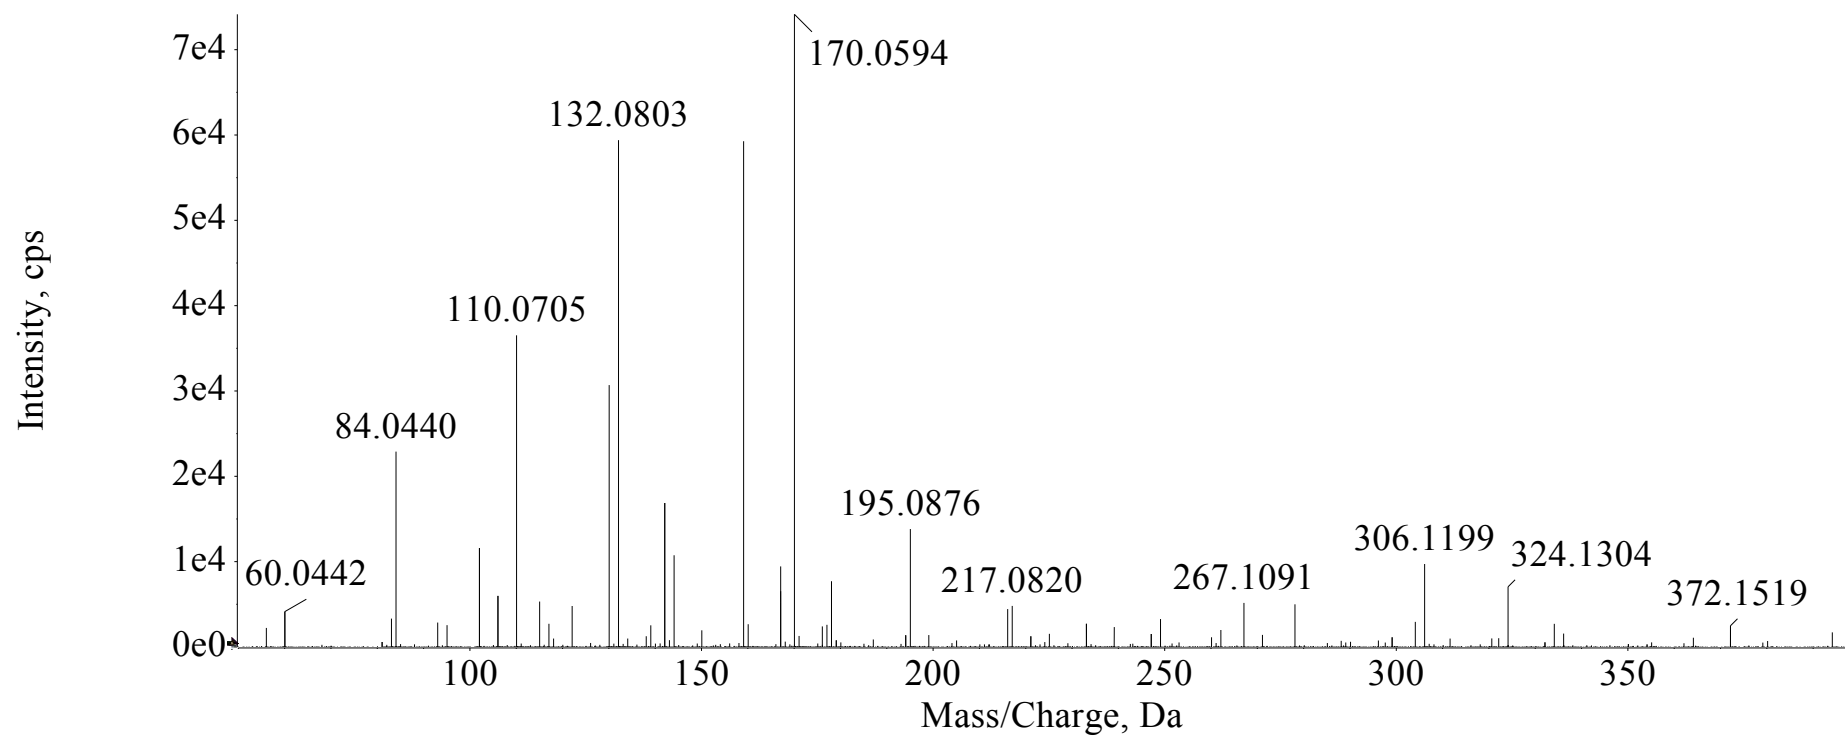



Spectrum from mass20181030.wiff2 (sample 136) - 68, Experiment 9, +IDA TOF MSMS (50 - 1500) from 0.070 min  
Precursor: 546.2 Da, +1, CE: 35.0

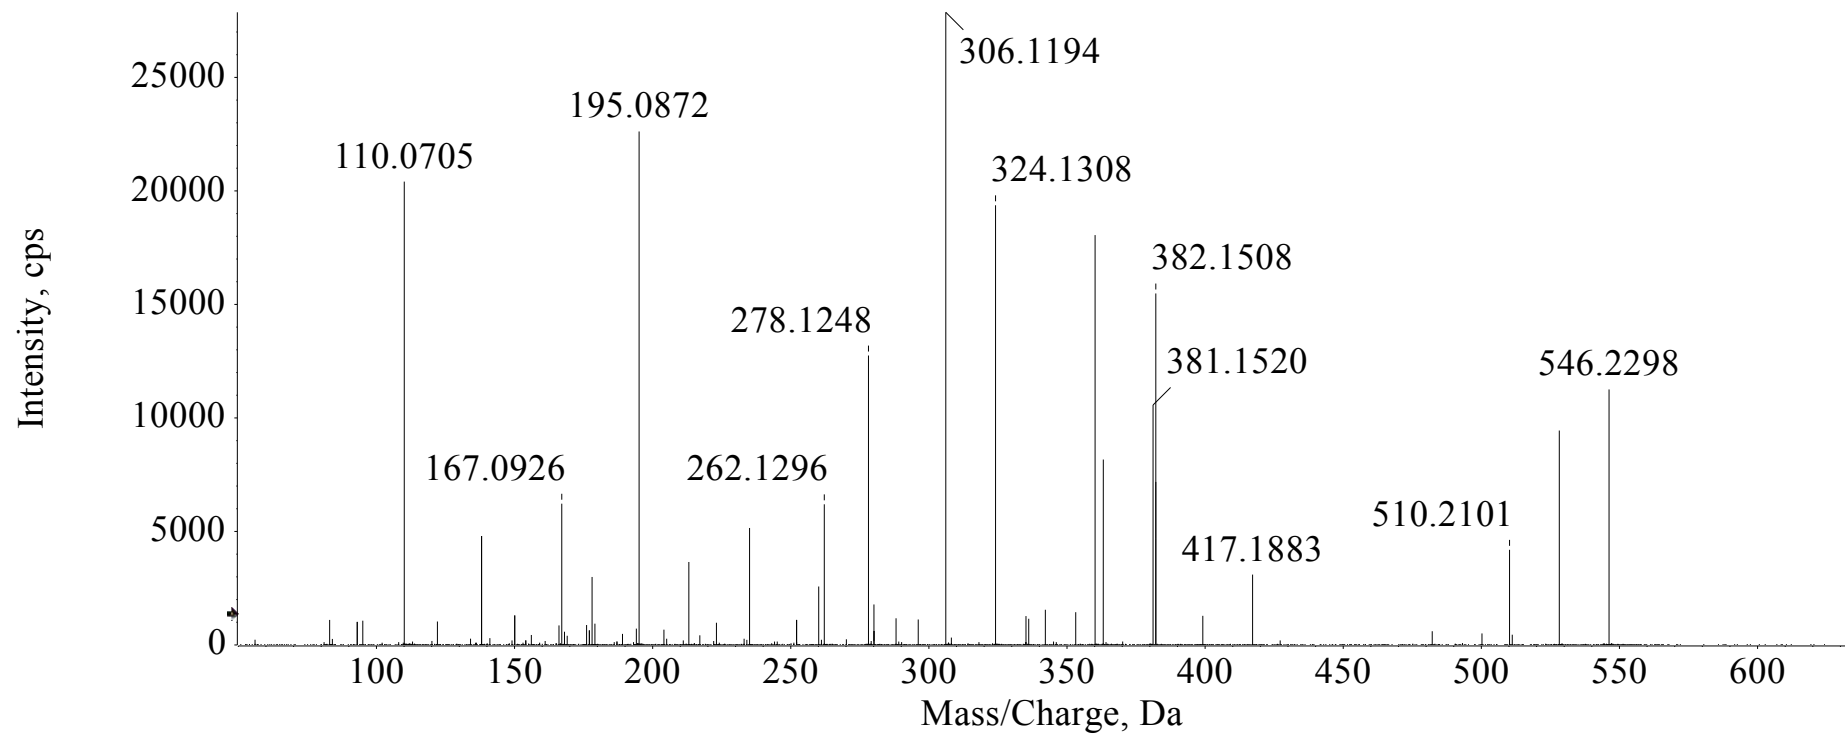

Spectrum from mass20181030.wiff2 (sample 140) - 70, Experiment 5, +IDA TOF MSMS (50 - 1500) from 0.080 min  
Precursor: 753.4 Da, +1, CE: 35.0

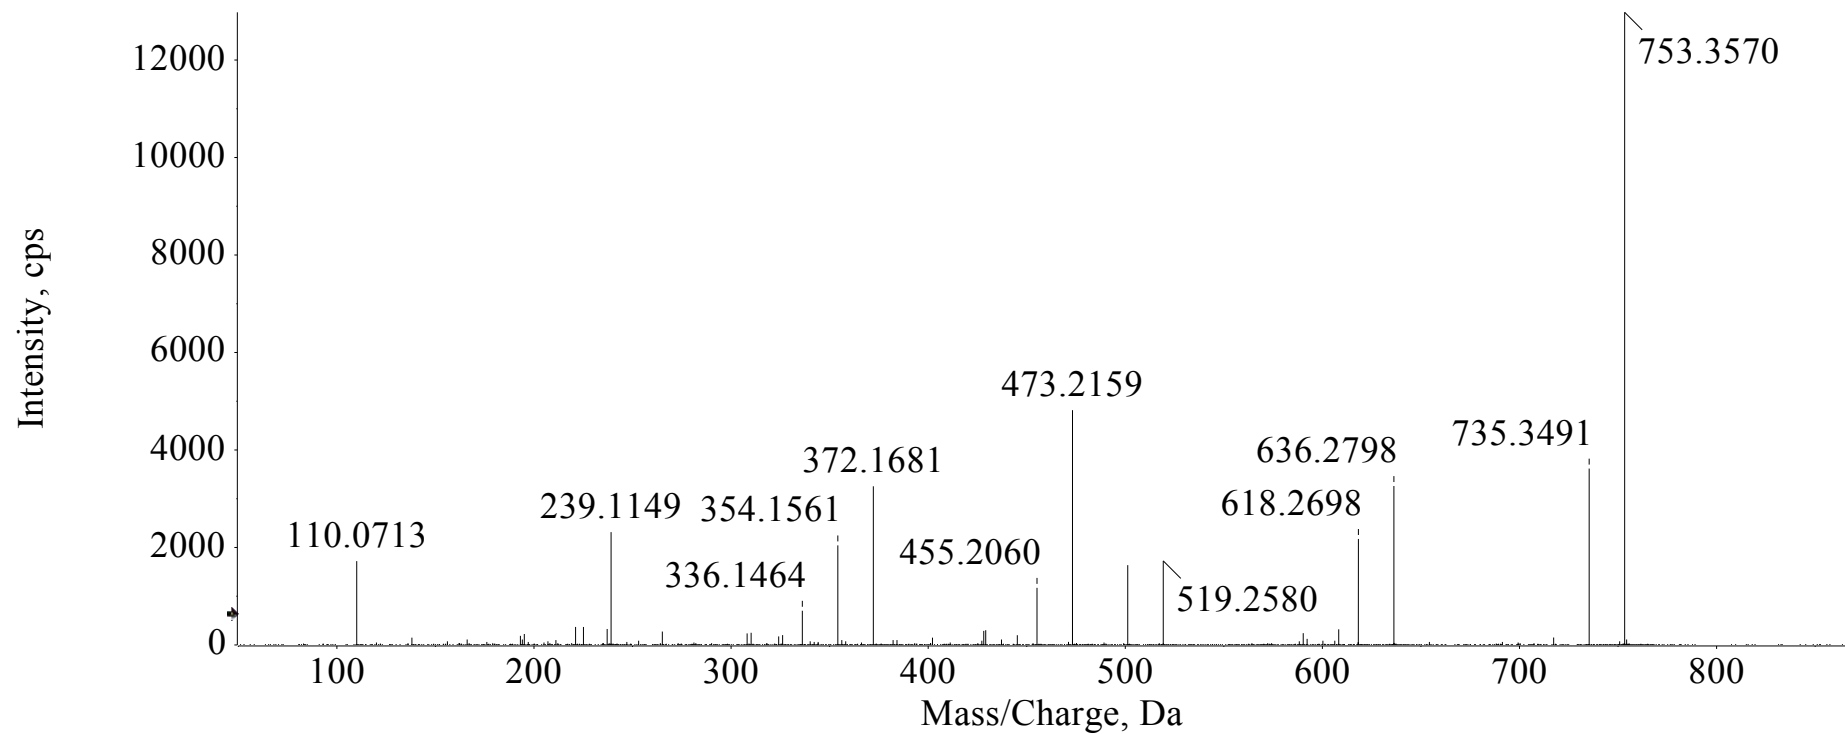

Spectrum from mass20181030.wiff2 (sample 142) - 71, Experiment 5, +IDA TOF MSMS (50 - 1500) from 0.069 min  
Precursor: 891.4 Da, +1, CE: 35.0

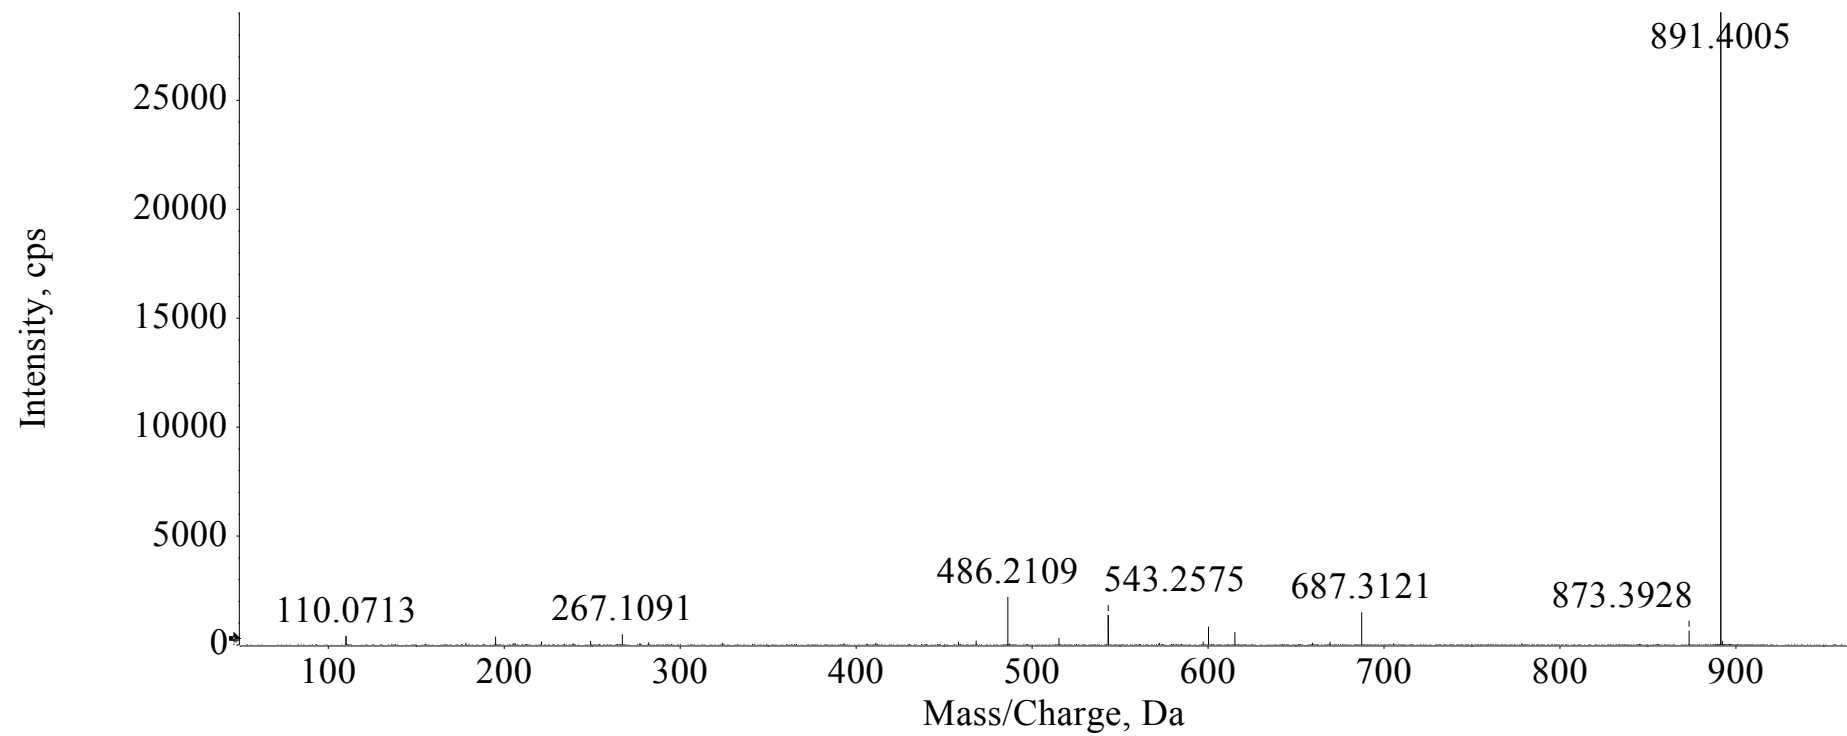

Spectrum from mass20181030.wiff2 (sample 146) - 73, Experiment 10, +IDA TOF MSMS (50 - 1500) from 0.071 min  
Precursor: 818.4 Da, +1, CE: 35.0

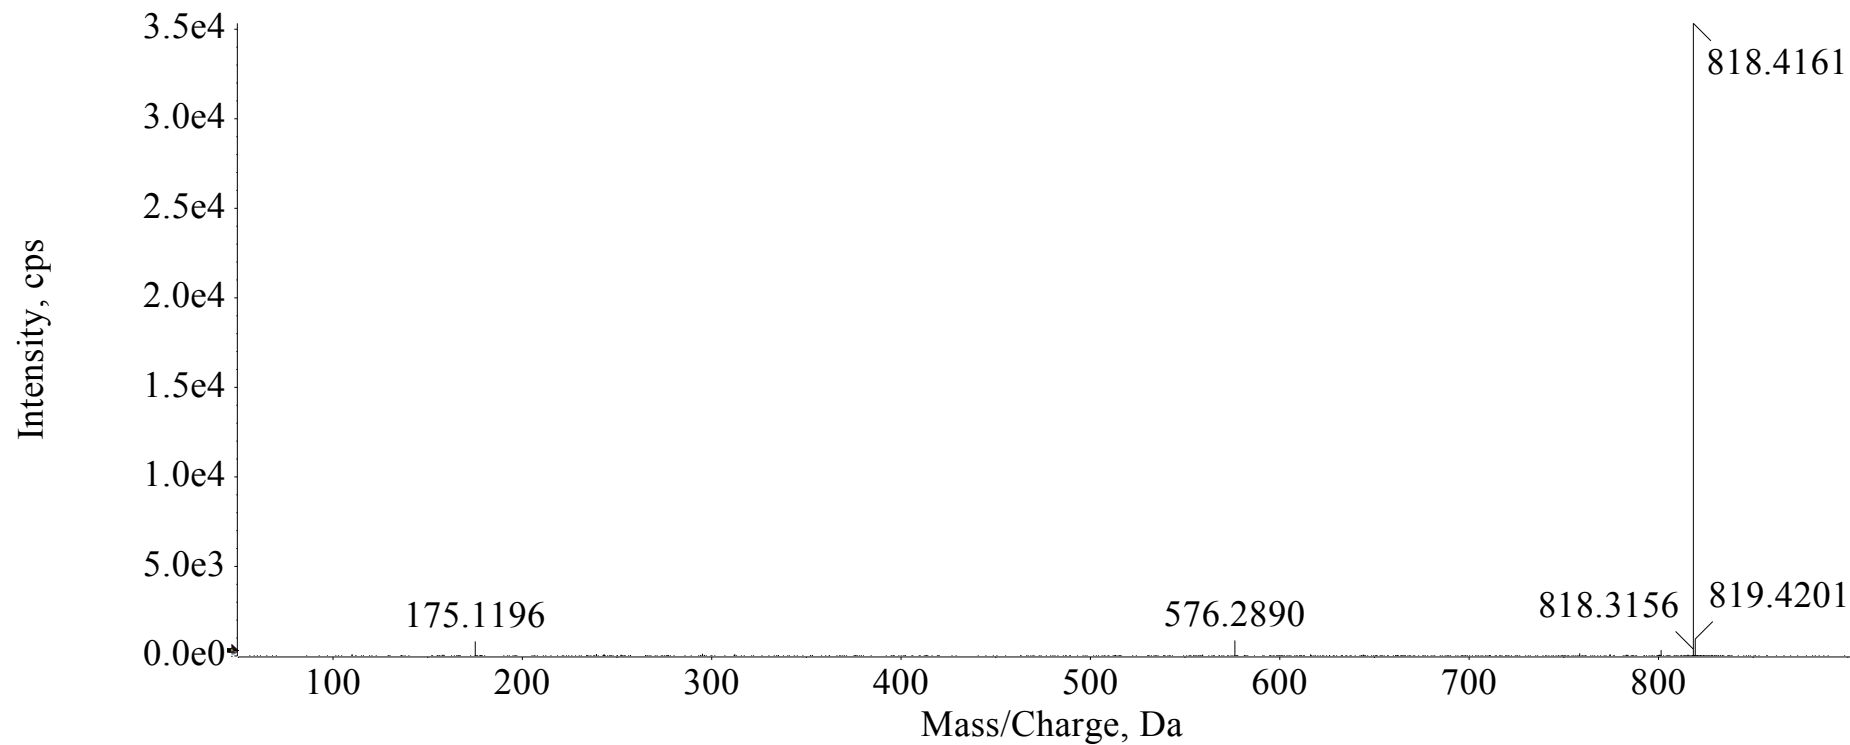

Spectrum from mass20181030.wiff2 (sample 148) - 74, Experiment 10, +IDA TOF MSMS (50 - 1500) from 0.071 min  
Precursor: 808.4 Da, +1, CE: 35.0

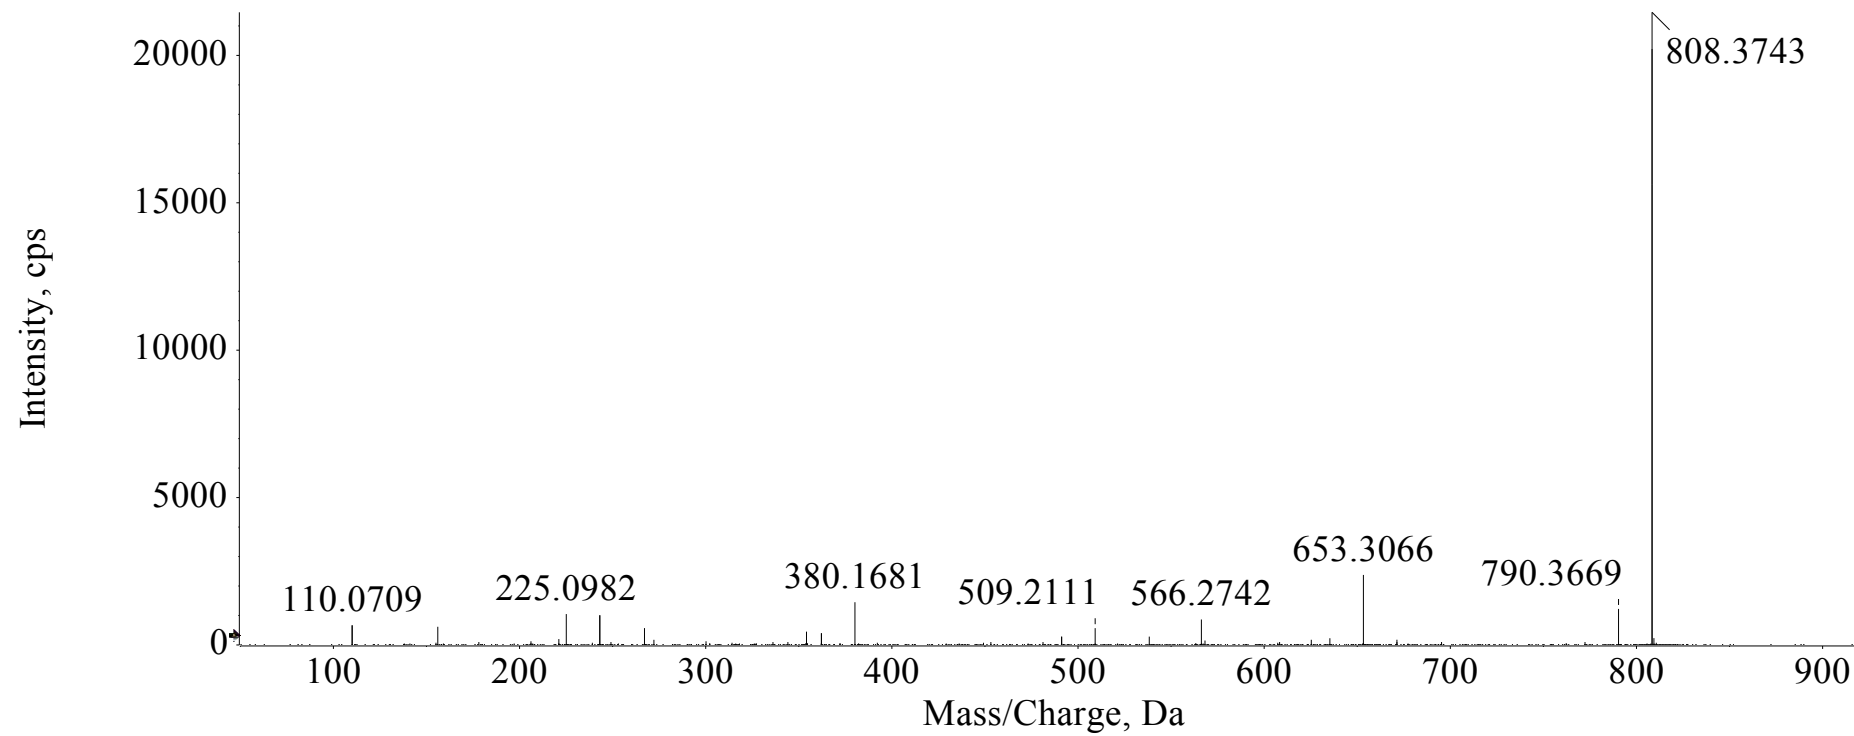

Spectrum from mass20181030.wiff2 (sample 152) - 76, Experiment 11, +IDA TOF MSMS (50 - 1500) from 0.072 min  
Precursor: 857.4 Da, +1, CE: 35.0

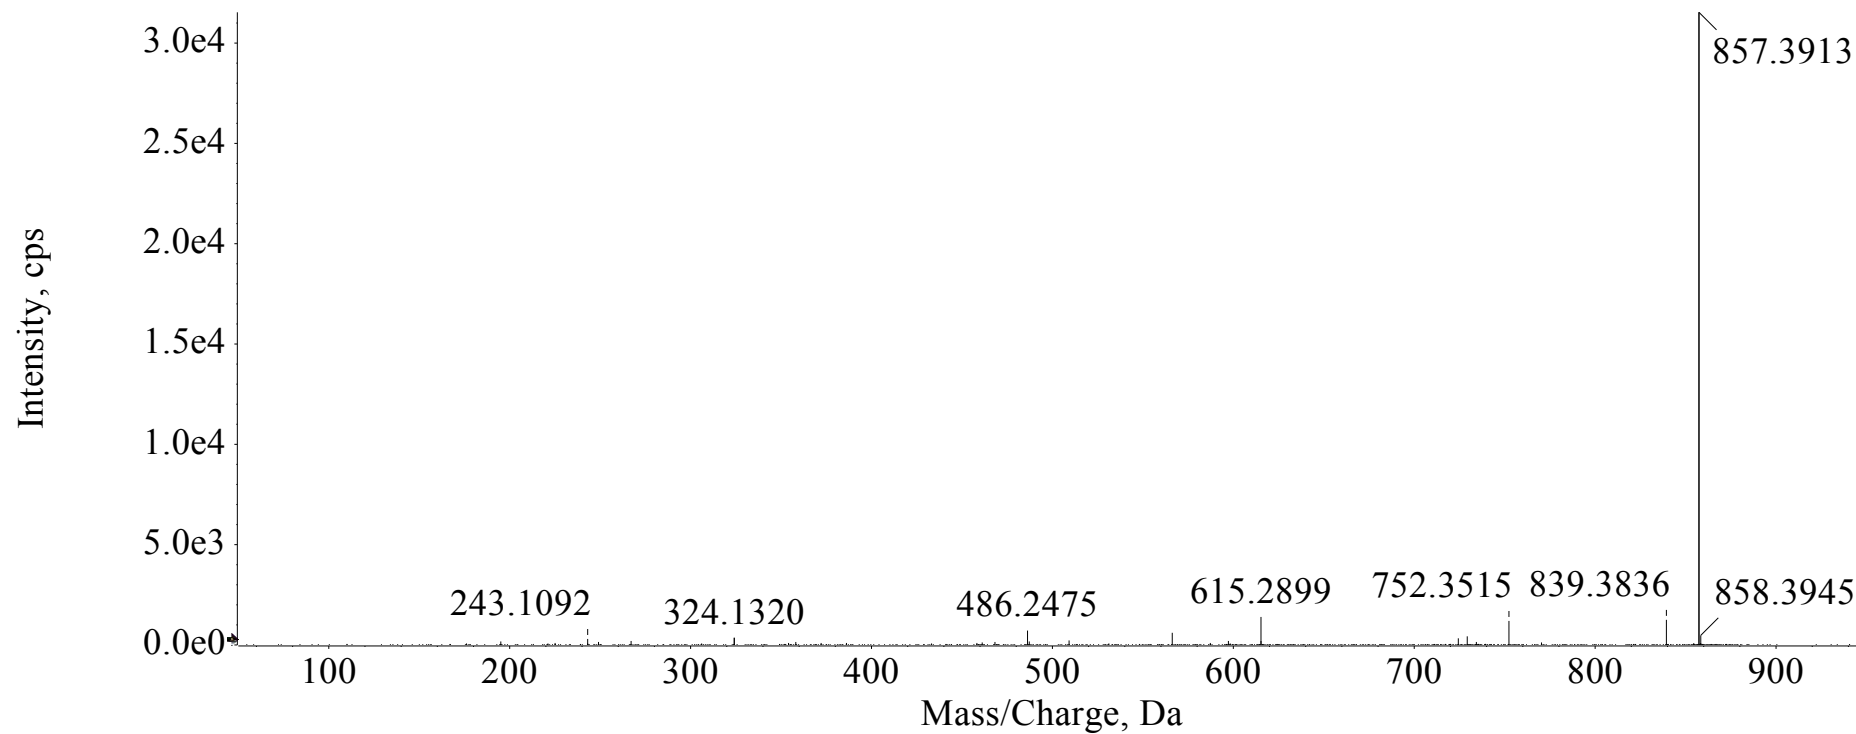

Spectrum from mass20181030.wiff2 (sample 158) - 79, Experiment 6, +IDA TOF MSMS (50 - 1500) from 0.068 min  
Precursor: 732.4 Da, +1, CE: 35.0

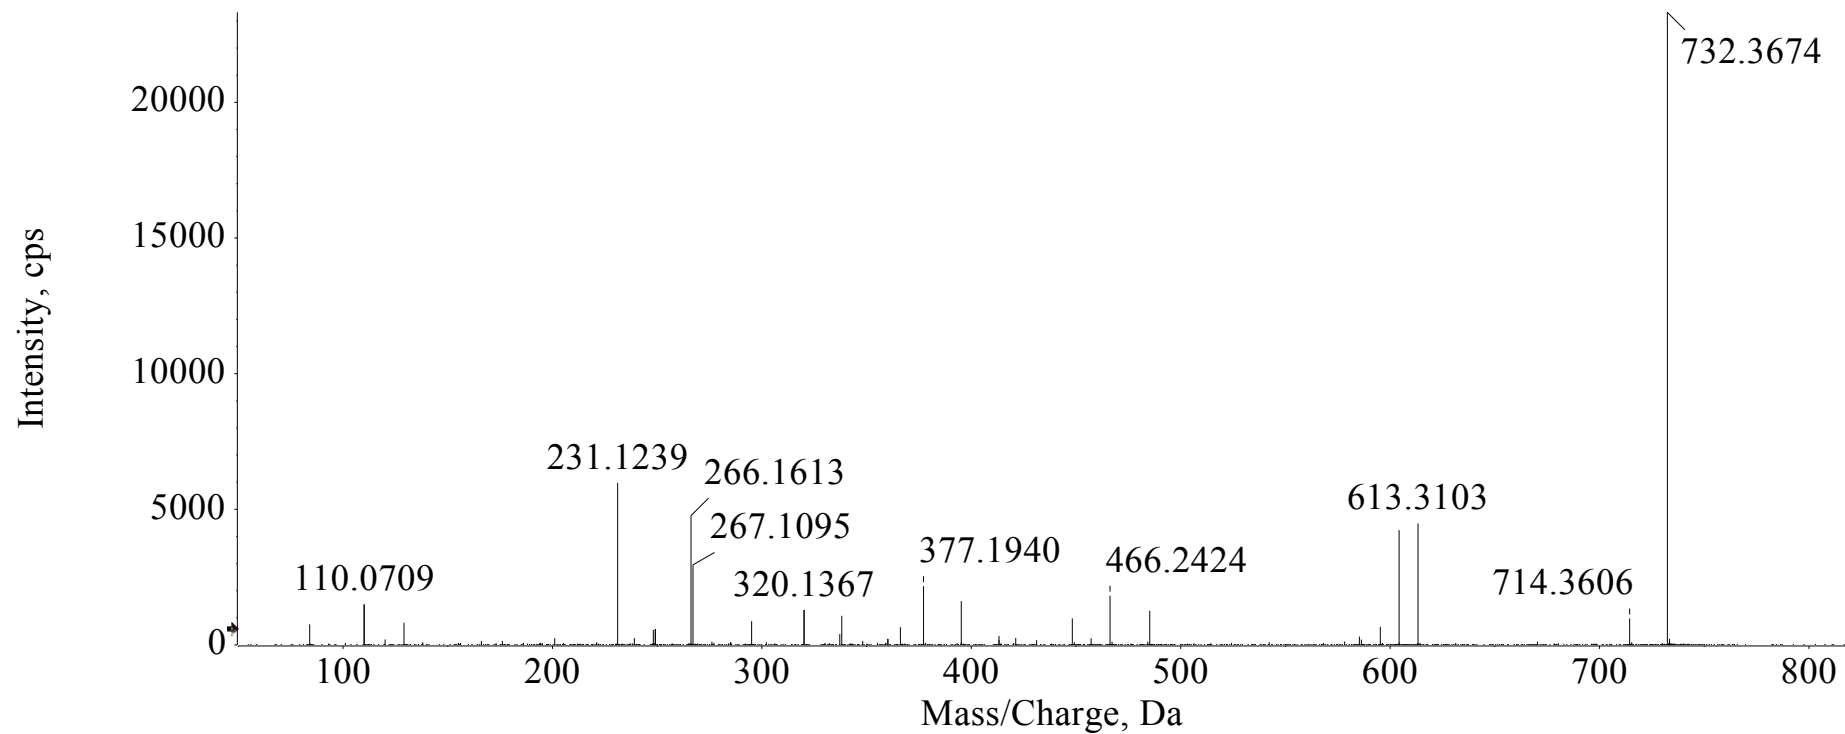

Spectrum from mass20181030.wiff2 (sample 160) - 80, Experiment 7, +IDA TOF MSMS (50 - 1500) from 0.070 min  
Precursor: 826.4 Da, +1, CE: 35.0

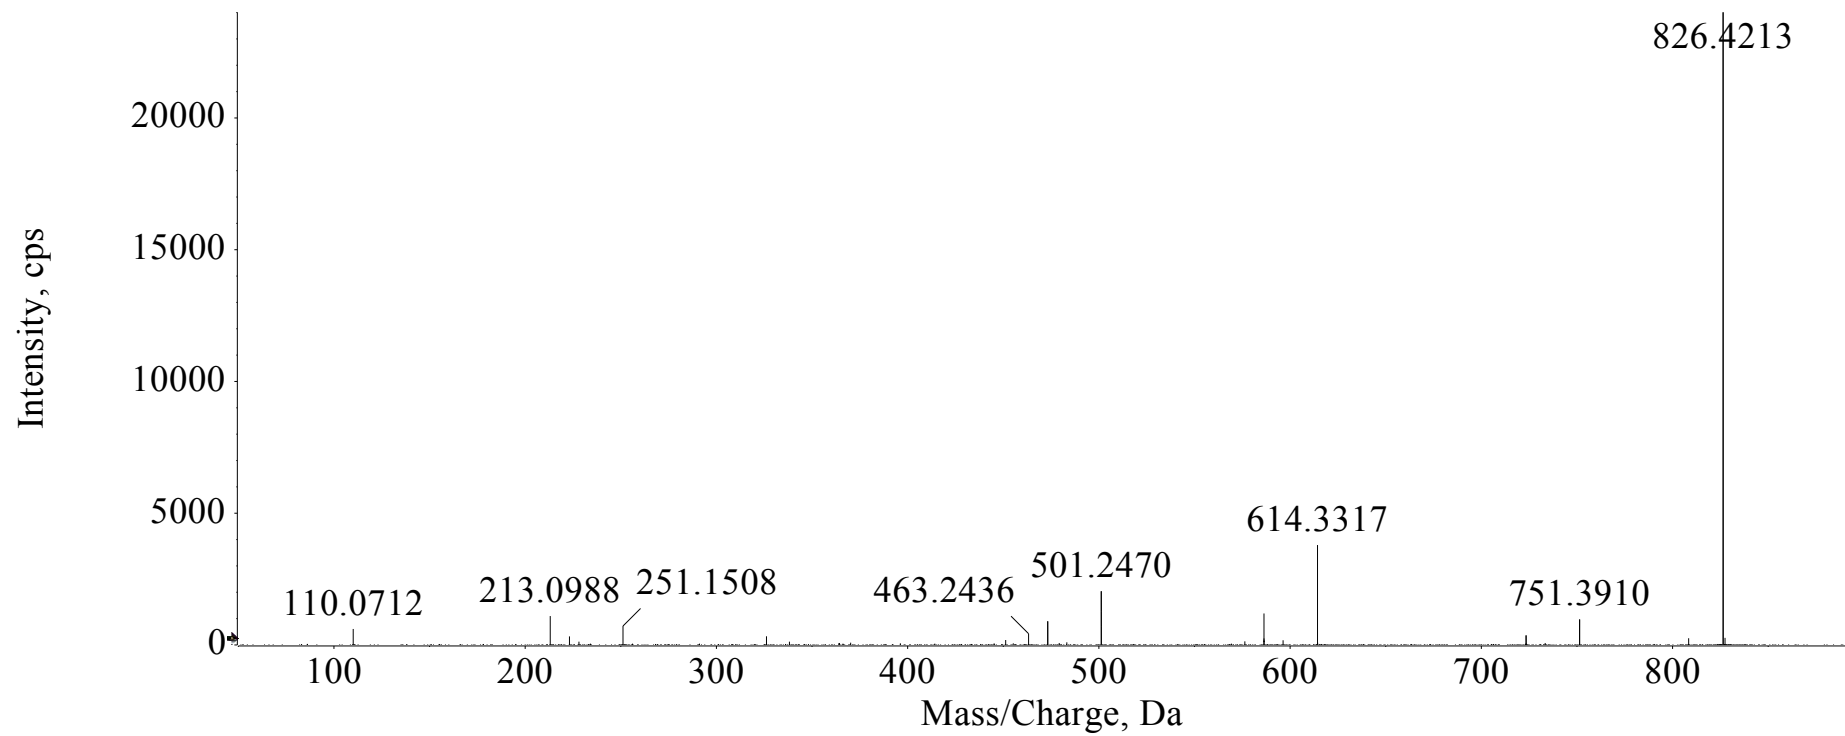



Spectrum from mass20181030.wiff2 (sample 162) - 81, Experiment 11, +IDA TOF MSMS (50 - 1500) from 0.072 min  
Precursor: 760.4 Da, +1, CE: 35.0

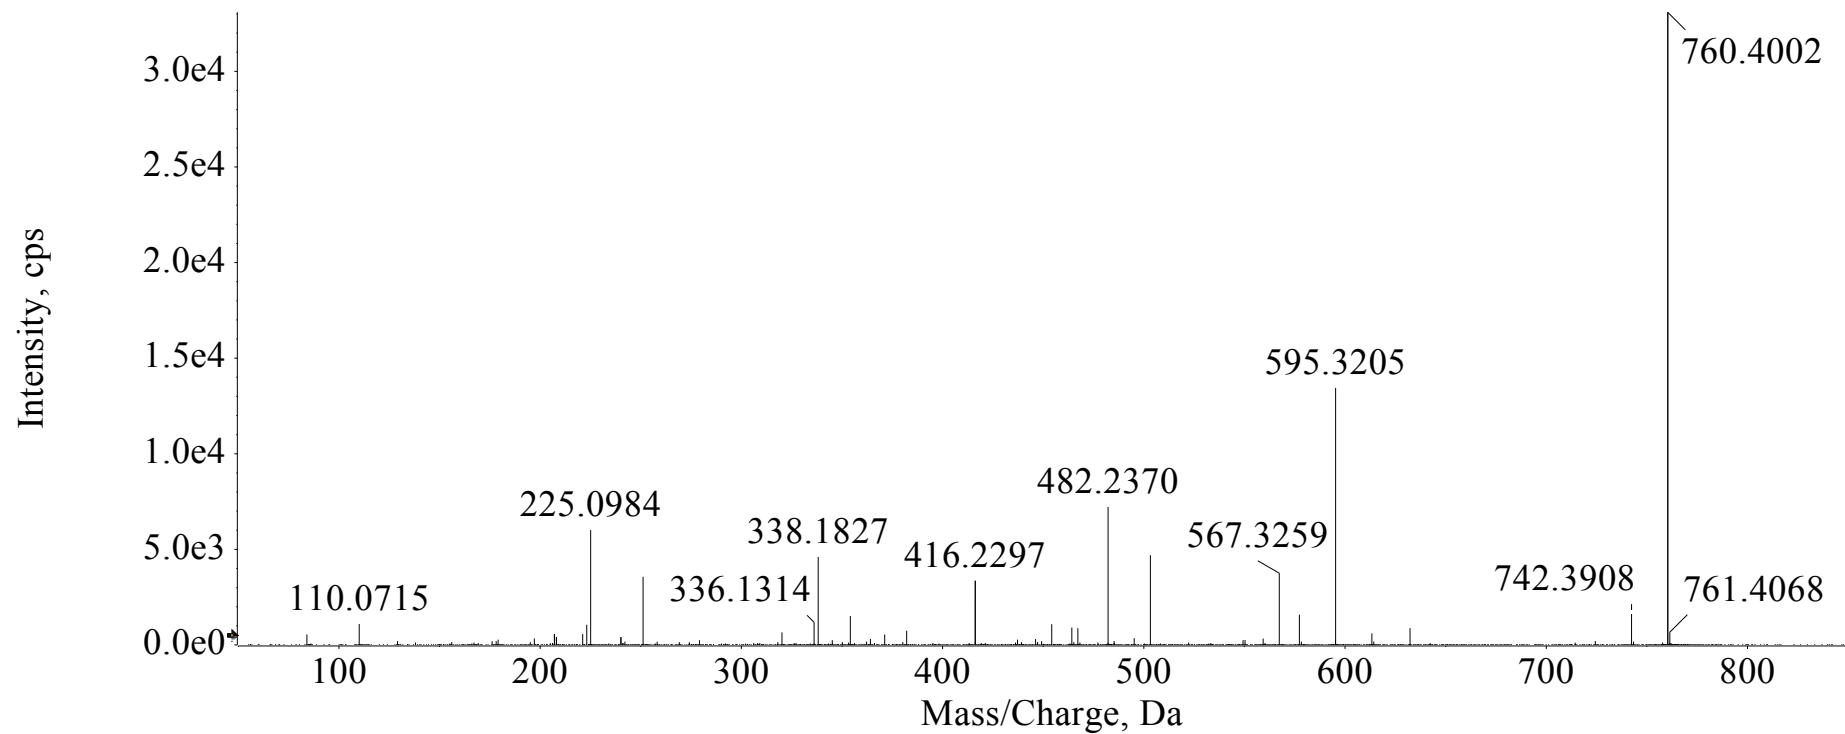

Spectrum from mass20181030.wiff2 (sample 164) - 82, Experiment 5, +IDA TOF MSMS (50 - 1500) from 0.069 min  
Precursor: 774.4 Da, +1, CE: 35.0

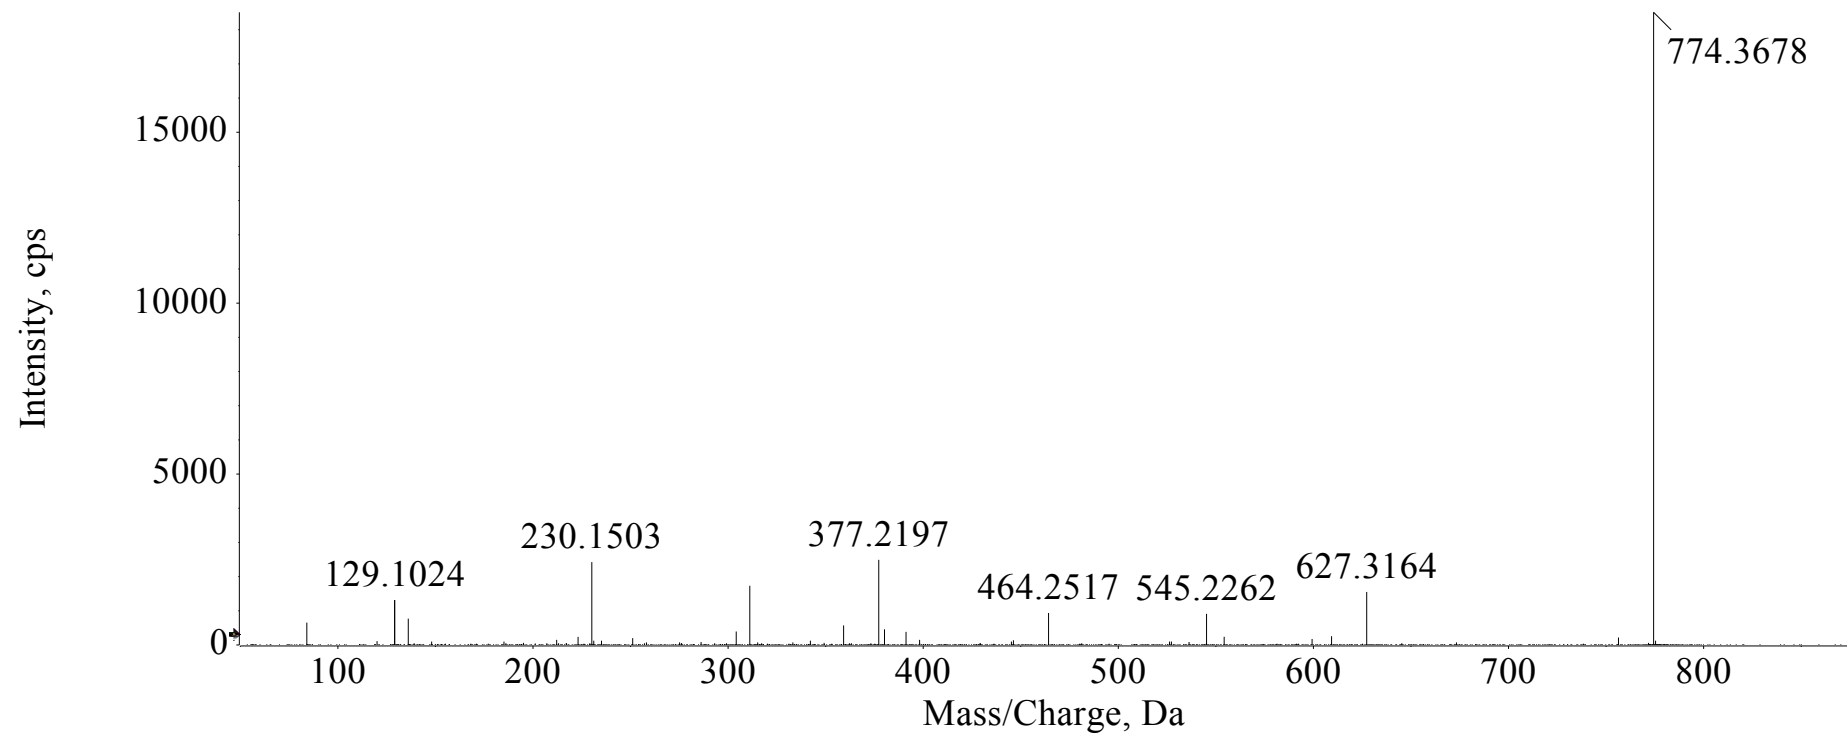

Spectrum from mass20181030.wiff2 (sample 166) - 83, Experiment 6, +IDA TOF MSMS (50 - 1500) from 0.070 min  
Precursor: 833.4 Da, +1, CE: 35.0

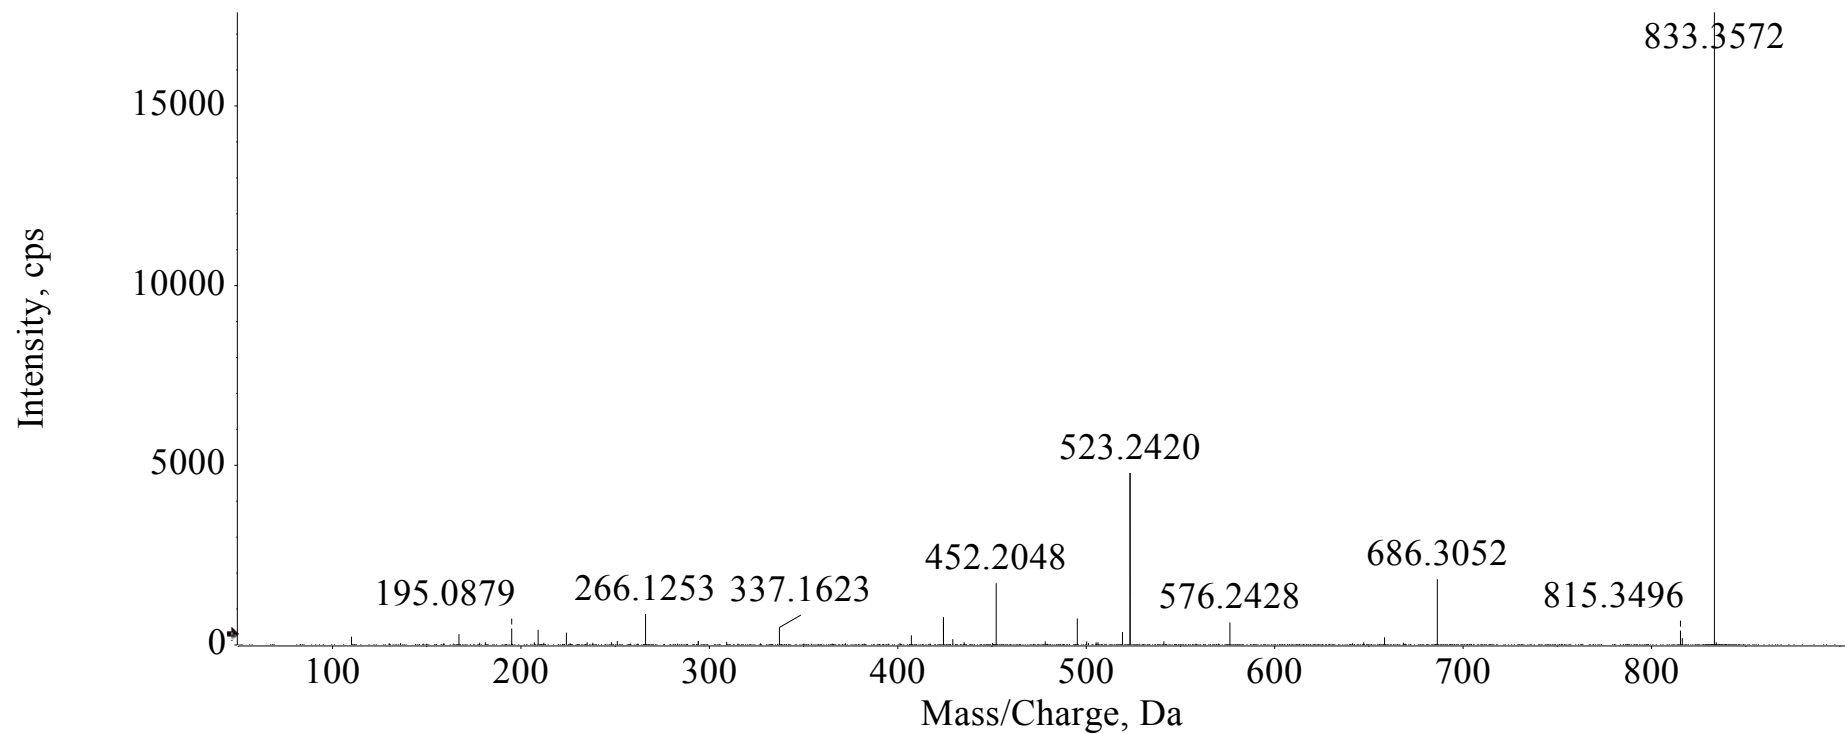

Spectrum from mass20181030.wiff2 (sample 168) - 84, Experiment 7, +IDA TOF MSMS (50 - 1500) from 0.070 min  
Precursor: 704.3 Da, +1, CE: 35.0

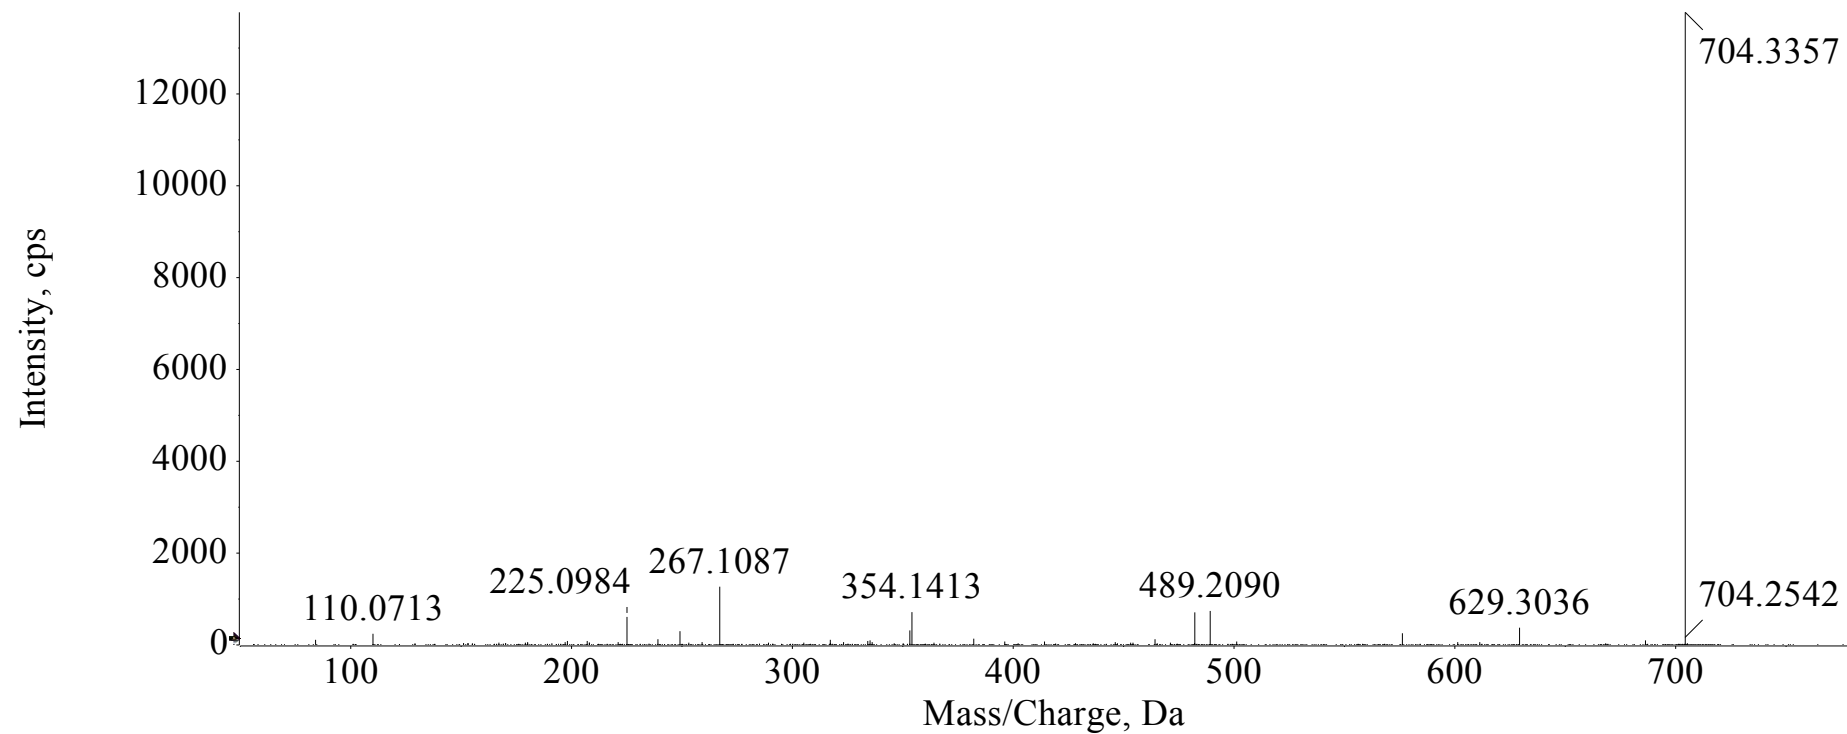

Spectrum from mass20181030.wiff2 (sample 170) - 85, Experiment 6, +IDA TOF MSMS (50 - 1500) from 0.070 min  
Precursor: 766.3 Da, +1, CE: 35.0

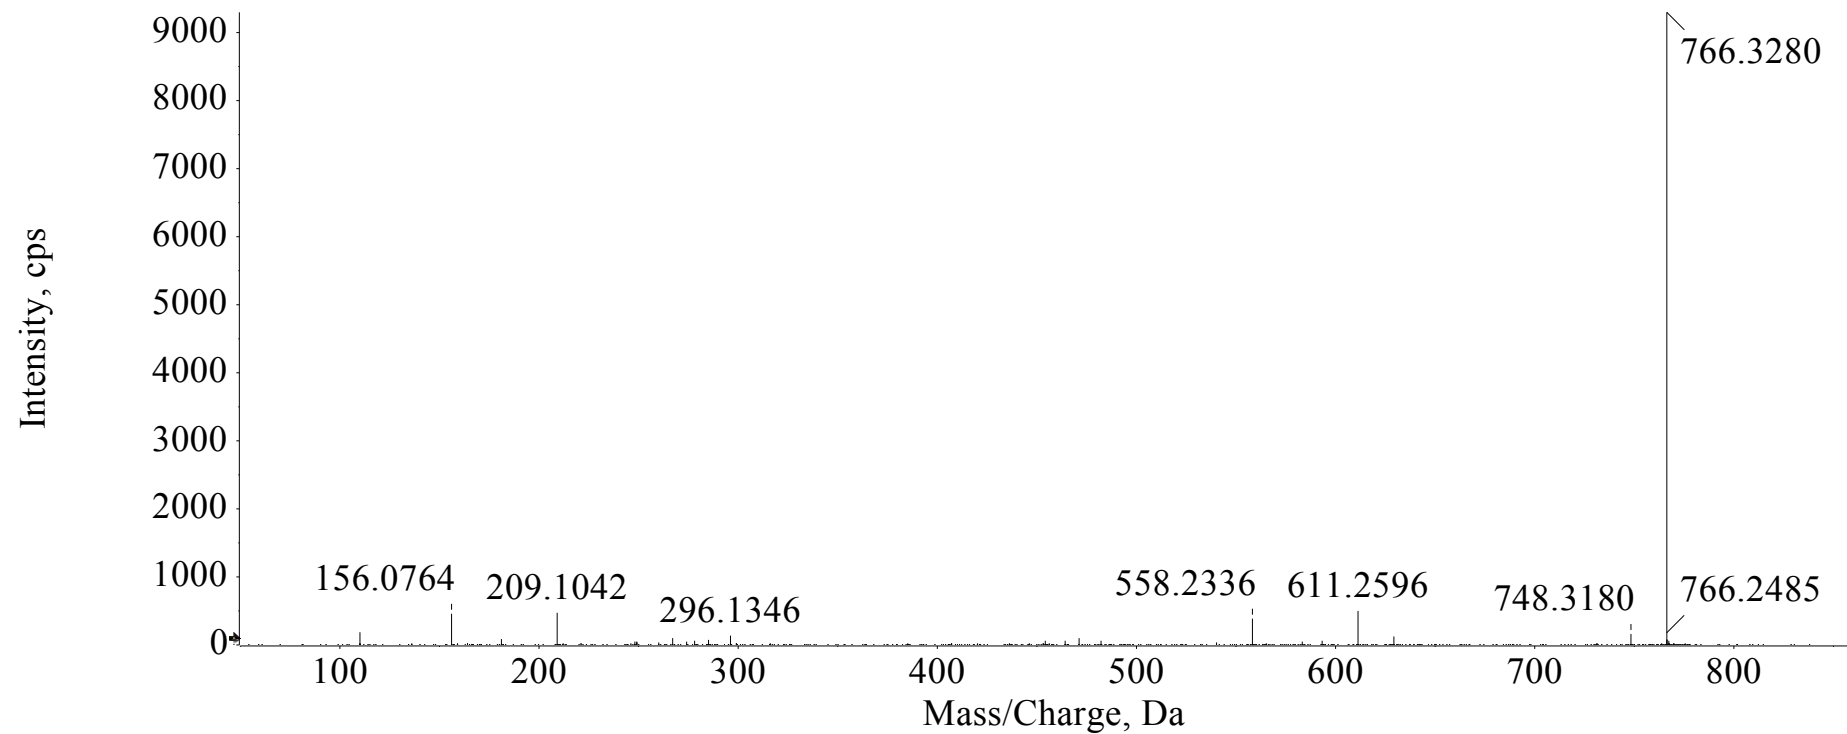

Spectrum from mass20181030.wiff2 (sample 172) - 86, Experiment 6, +IDA TOF MSMS (50 - 1500) from 0.070 min  
Precursor: 729.3 Da, +1, CE: 35.0

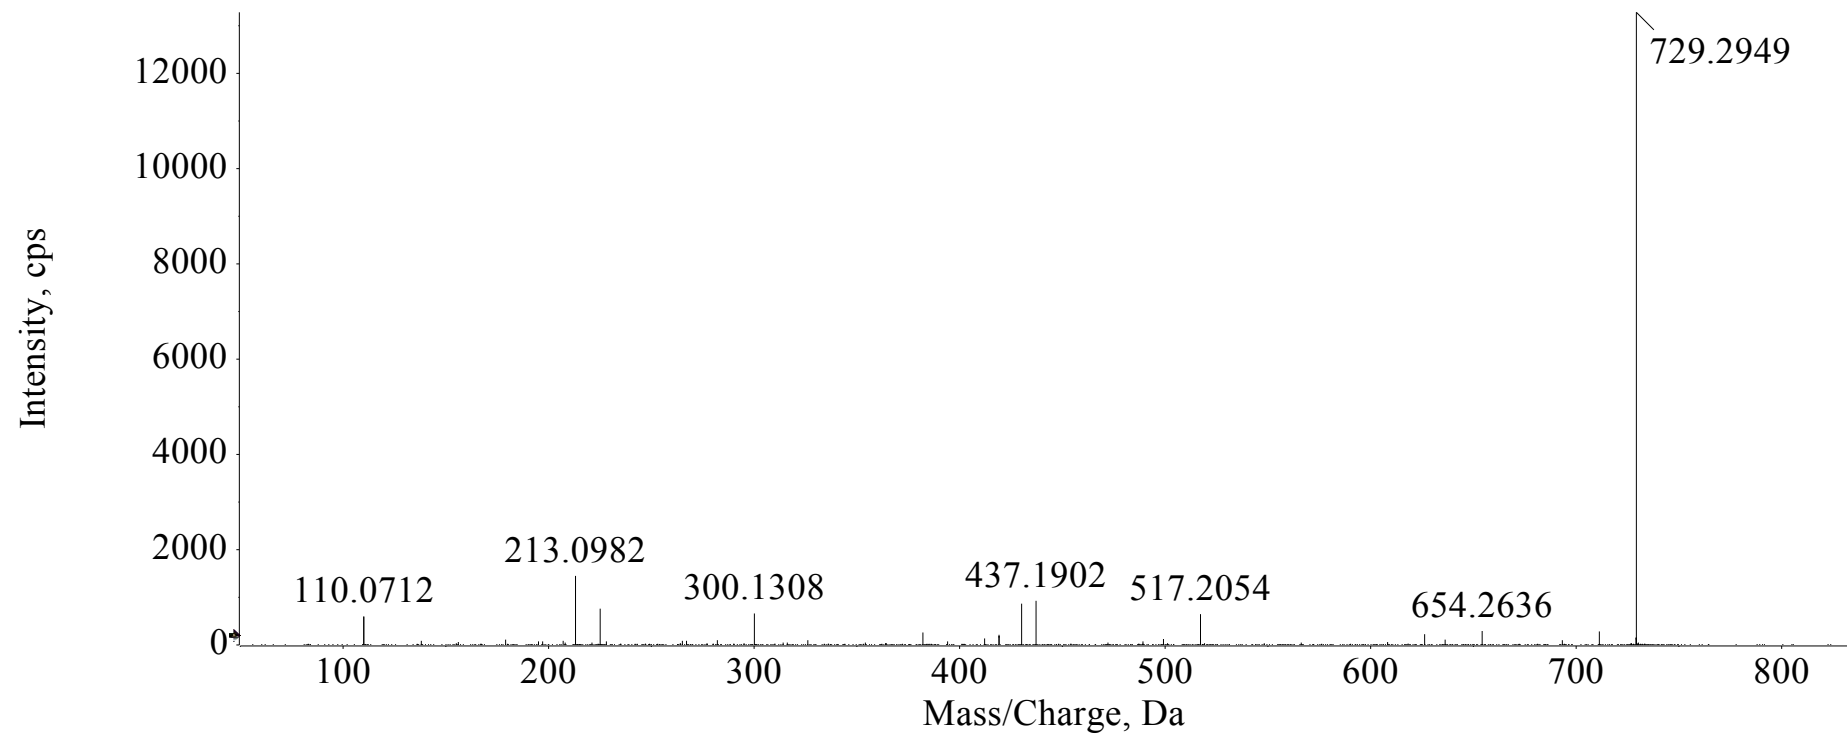

Spectrum from mass20181030.wiff2 (sample 174) - 87, Experiment 7, +IDA TOF MSMS (50 - 1500) from 0.069 min  
Precursor: 589.3 Da, +1, CE: 35.0

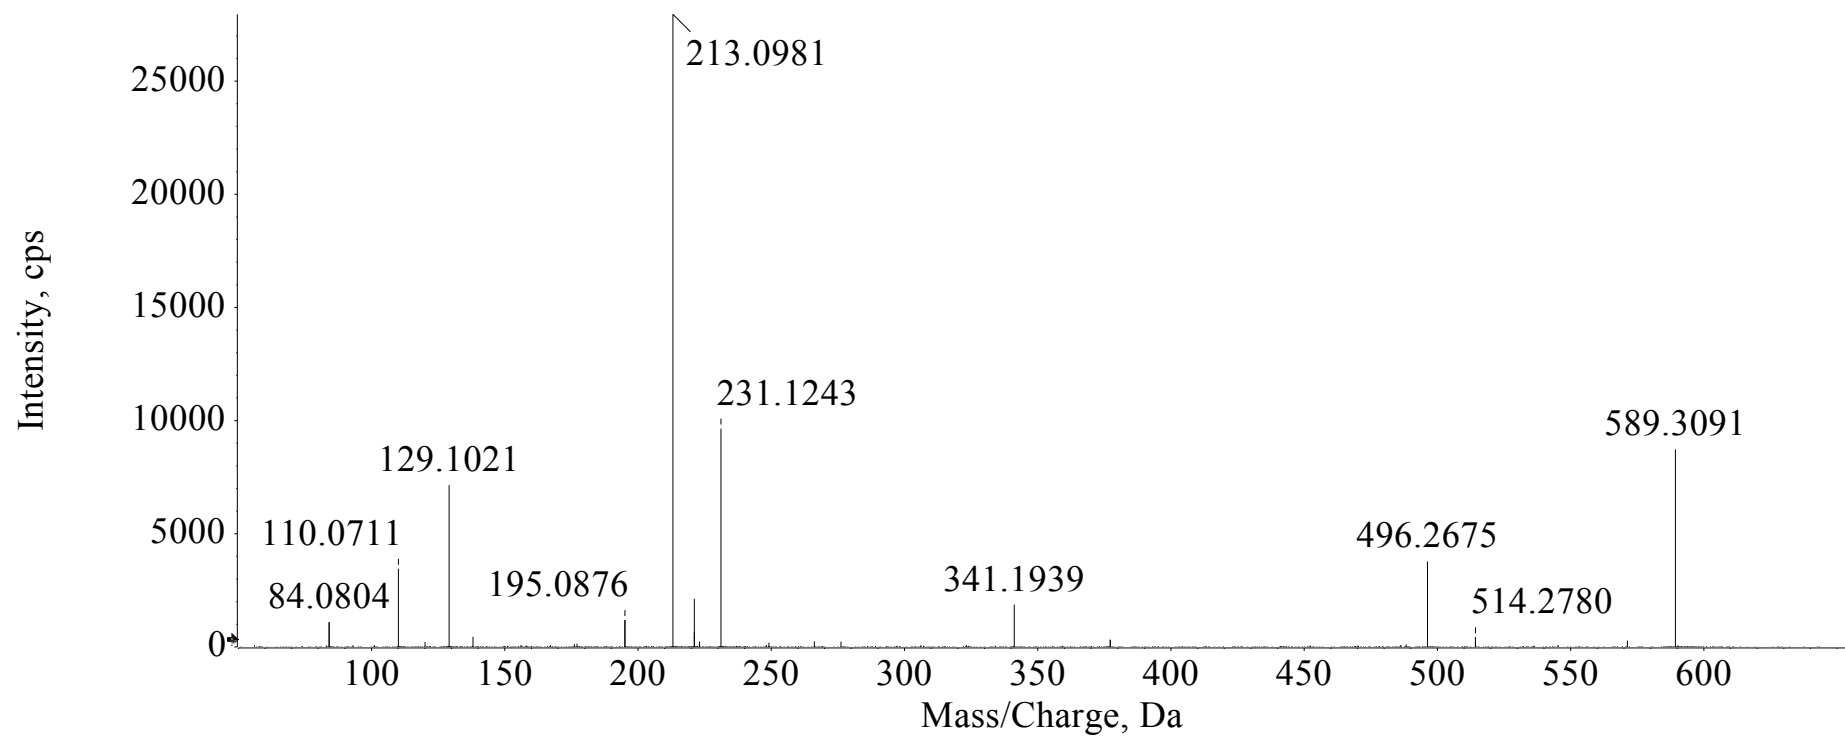

Spectrum from mass20181030.wiff2 (sample 176) - 88, Experiment 7, +IDA TOF MSMS (50 - 1500) from 0.069 min  
Precursor: 583.3 Da, +1, CE: 35.0

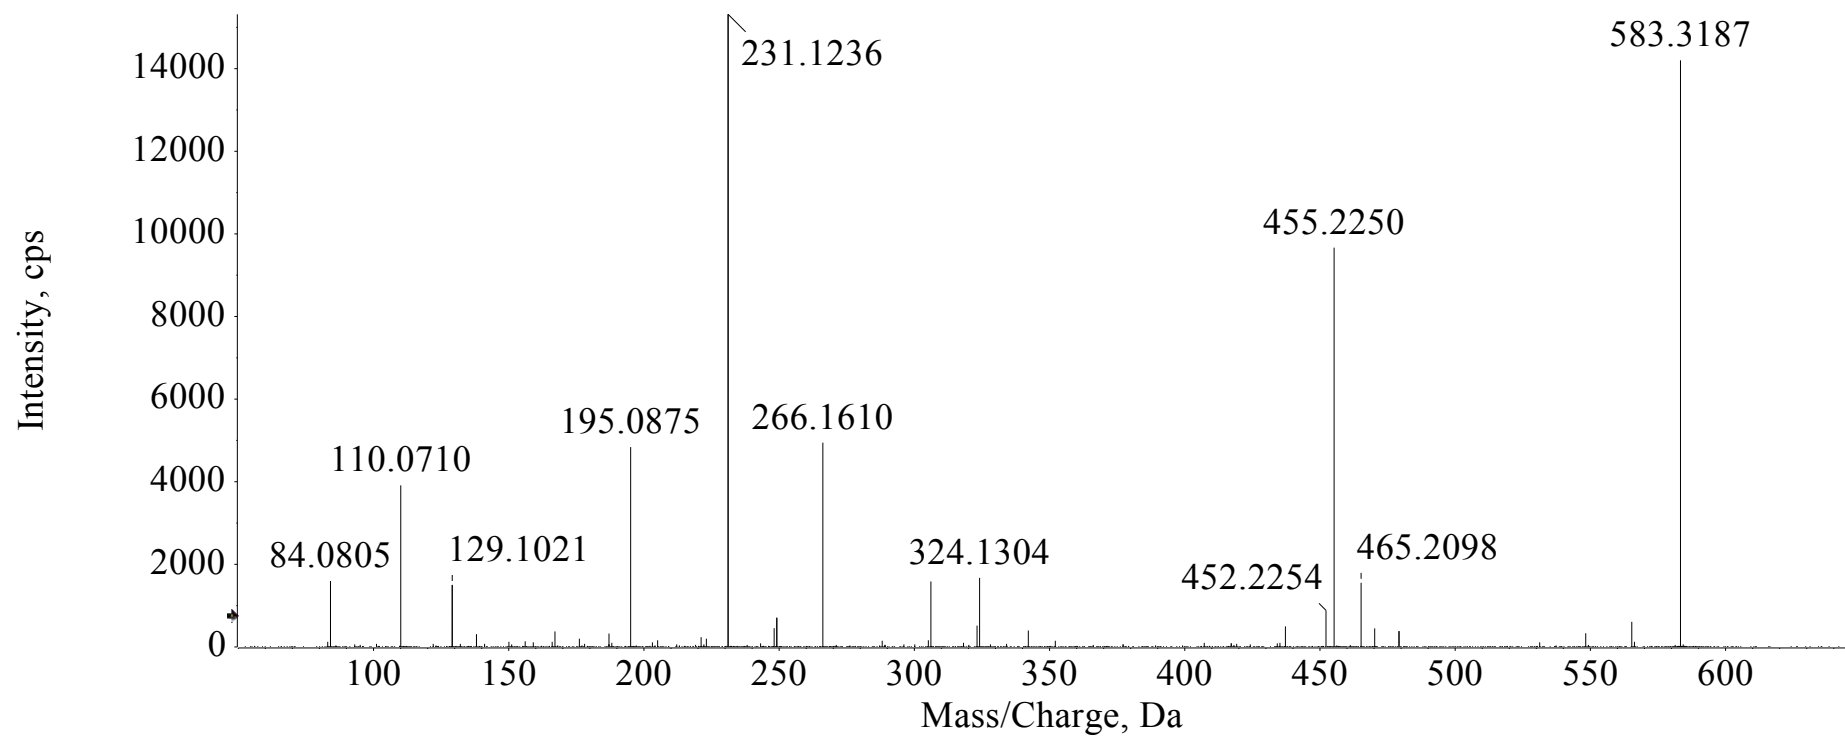



Spectrum from mass20181030.wiff2 (sample 178) - 89, Experiment 6, +IDA TOF MSMS (50 - 1500) from 0.069 min  
Precursor: 663.3 Da, +1, CE: 35.0

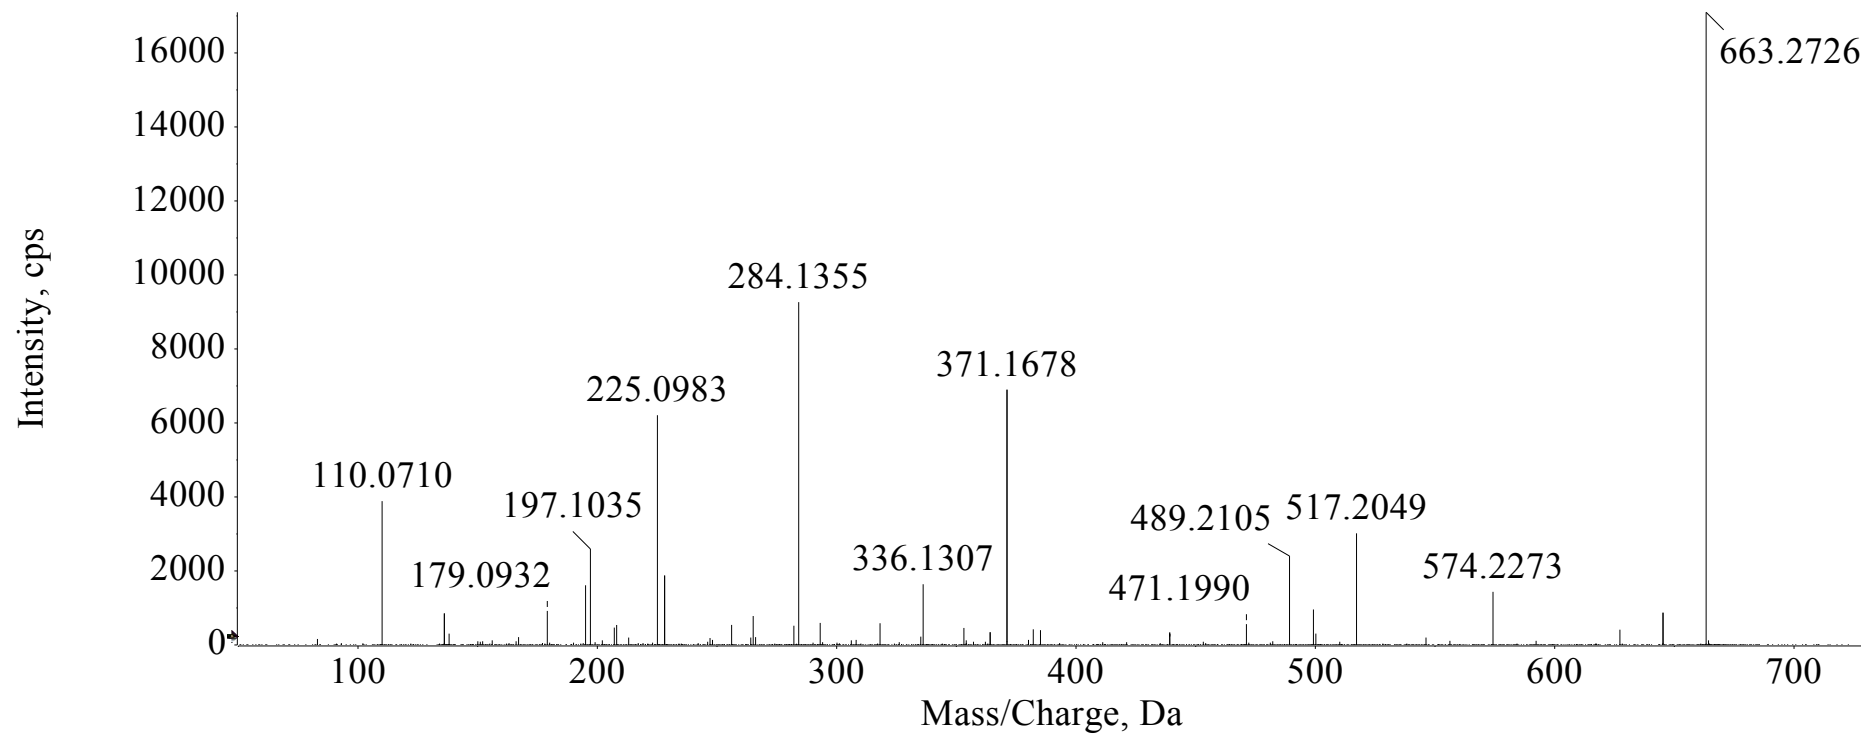

Spectrum from mass20181030.wiff2 (sample 180) - 90, Experiment 3, +IDA TOF MSMS (50 - 1500) from 0.068 min  
Precursor: 701.3 Da, +1, CE: 35.0

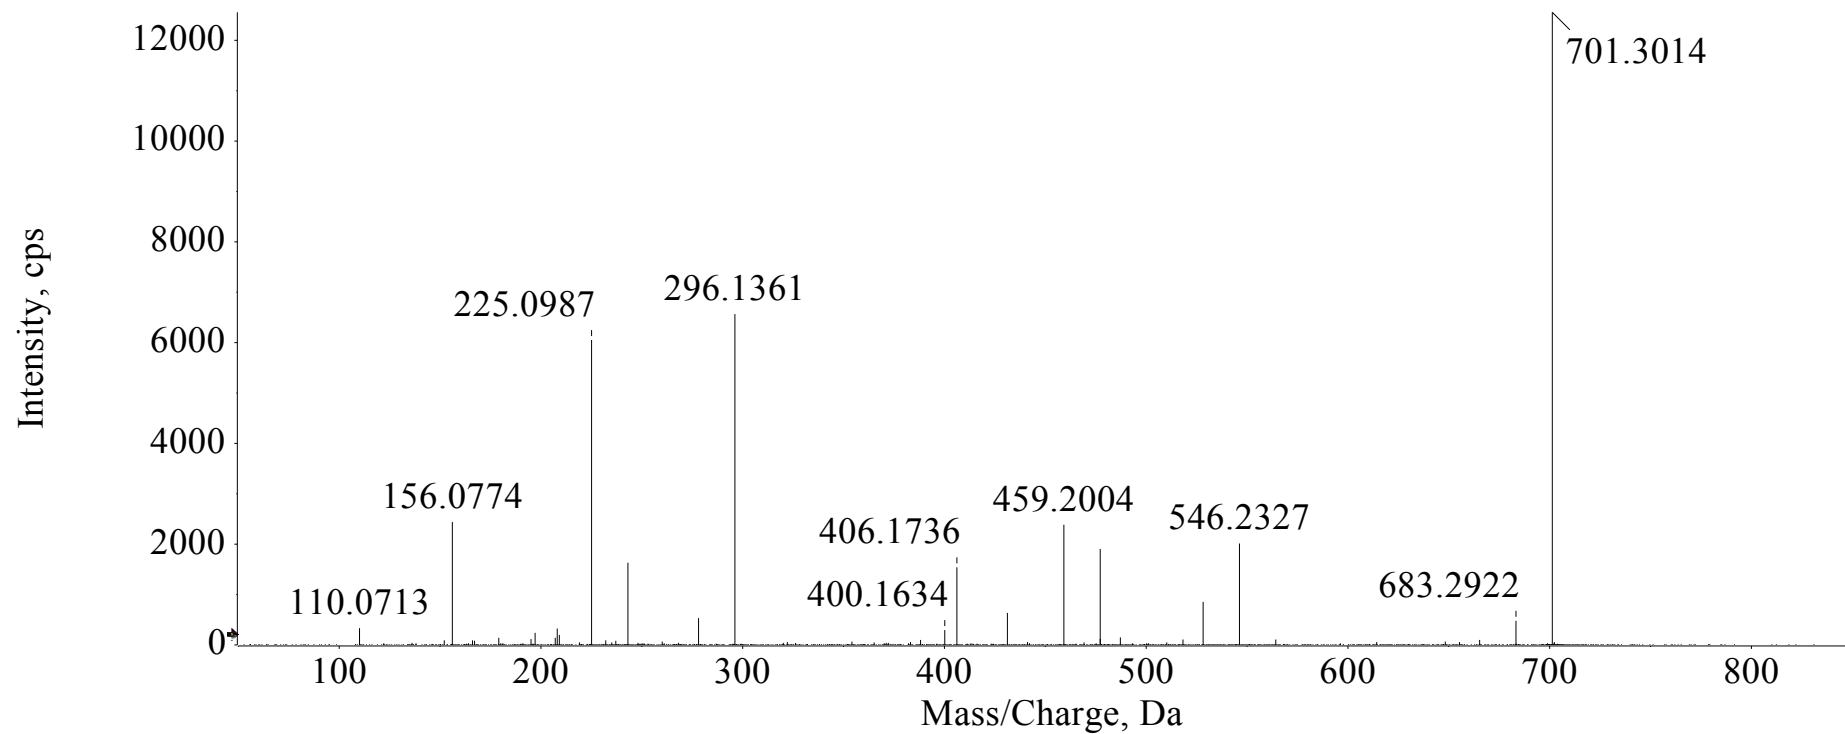

Supplement: c9ra01623f1.pdf [file c9ra01623f1.pdf]
